# Supplementary material for: Contrasting phytoplankton-zooplankton distributions observed through autonomous platforms, in-situ optical sensors and discrete sampling
Source: PLoS One. 2022 Sep 6;17(9):e0273874. doi: 10.1371/journal.pone.0273874 (PMC9447933; doi:10.1371/journal.pone.0273874)
Supplement: S1 File — (XLSX) [file pone.0273874.s005.xlsx]

## Sheet: AUV_box_B
latitude	longitude	depth (m)	temperature (°C)	salinity	chlorophyll (mg m-3)
62.3824	5.69375	0.03	11.724	32.364	0.542529
62.3824	5.69375	0.05	11.693	27.175	0.46593
62.3824	5.69375	0.05	11.6967	26.9352	0.4599
62.3824	5.69375	0.05	11.724	25.141	0.414779
62.3824	5.69375	0.0523423	11.7116	25.5962	0.4088
62.3824	5.69376	0.07	11.618	29.028	0.402361
62.3824	5.69376	0.0664635	11.6303	26.7769	0.4015
62.3824	5.69376	0.04	11.722	9.932	0.433729
62.3824	5.69376	0.03883	11.7219	12.4537	0.438
62.3824	5.69377	0.03	11.721	31.485	0.412216
62.3824	5.69377	0.0358559	11.7192	29.9434	0.4088
62.3824	5.69377	0.08	11.706	18.322	0.415239
62.3824	5.69377	0.0752847	11.708	19.5384	0.4161
62.3824	5.69377	0.04	11.723	28.641	0.364533
62.3824	5.69377	0.0423447	11.7182	29.0349	0.3577
62.3824	5.69377	0.06	11.682	32.001	0.38021
62.3824	5.69378	0.03	11.723	15.494	0.405811
62.3824	5.69377	0.03234	11.7231	17.4781	0.4088
62.3824	5.69377	0.05	11.724	32.452	0.389462
62.3824	5.69377	0.0511723	11.7137	32.3134	0.3869
62.3824	5.69378	0.06	11.636	31.27	0.412625
62.3824	5.69378	0.0635629	11.6462	28.964	0.4161
62.3824	5.69377	0.09	11.722	11.853	0.409654
62.3824	5.69378	0.08298	11.7222	14.2619	0.4088
62.3824	5.69379	0.03	11.724	32.442	0.415246
62.3824	5.69379	0.0358617	11.7205	32.2597	0.4161
62.3824	5.69379	0.08	11.694	30.887	0.422531
62.3824	5.69379	0.0740619	11.6978	30.0516	0.4234
62.3824	5.69379	0.03	11.726	23.853	0.436292
62.3824	5.69379	0.03117	11.7258	24.6055	0.438
62.3824	5.69379	0.04	11.724	30.285	0.425108
62.3824	5.69379	0.0470341	11.7088	29.9887	0.4234
62.3824	5.6938	0.1	11.594	27.758	0.433047
62.3824	5.6938	0.04	11.724	12.892	0.444019
62.3824	5.6938	0.04	11.7236	15.1269	0.4453
62.3824	5.6938	0.04	11.721	31.994	0.413071
62.3824	5.6938	0.0423423	11.7174	32.0281	0.4088
62.3824	5.6938	0.06	11.69	32.285	0.421677
62.3824	5.6938	0.0564635	11.6938	29.3904	0.4234
62.3824	5.69381	0.03	11.722	7.73	0.378279
62.3824	5.69381	0.03234	11.7224	10.6162	0.3723
62.3824	5.69381	0.05	11.725	32.398	0.410975
62.3824	5.69381	0.04883	11.7251	32.3568	0.4161
62.3824	5.69381	0.04	11.726	32.046	0.435438
62.3824	5.69381	0.03766	11.726	32.0937	0.438
62.3824	5.69381	0.02	11.726	32.454	0.450892
62.3824	5.69381	0.023517	11.7145	31.8558	0.4526
62.3824	5.69382	0.05	11.628	27.351	0.394718
62.3824	5.69382	0.0488124	11.6392	25.1139	0.3869
62.3824	5.69382	0.04	11.722	8.514	0.370785
62.3824	5.69383	0.03	11.724	32.162	0.352535
62.3824	5.69383	0.03234	11.7241	32.157	0.3504
62.3824	5.69383	0.05	11.725	32.119	0.38263
62.3824	5.69383	0.05468	11.7249	32.1575	0.3869
62.3824	5.69383	0.09	11.724	32.448	0.361116
62.3824	5.69383	0.08415	11.7244	32.4487	0.3577
62.3824	5.69381	0.04	11.727	32.454	0.364146
62.3824	5.69381	0.04468	11.727	32.4541	0.365
62.3824	5.69379	0.08	11.727	32.455	0.365
62.3824	5.69378	0.08	11.7269	32.4549	0.365
62.3824	5.69376	0.08	11.726	32.454	0.358554
62.3824	5.69376	0.09404	11.726	32.4541	0.3577
62.3824	5.69373	0.2	11.726	32.455	0.3577
62.3824	5.69373	0.21053	11.7264	32.4551	0.3577
62.3823	5.69371	0.29	11.729	32.456	0.344808
62.3823	5.69371	0.30989	11.7289	32.4558	0.3431
62.3823	5.69369	0.46	11.728	32.454	0.349546
62.3823	5.69367	0.62	11.729	32.455	0.356846
62.3823	5.69367	0.65978	11.729	32.4551	0.3577
62.3823	5.69368	0.96	11.729	32.456	0.383484
62.3823	5.69368	1.00329	11.7291	32.4559	0.3869
62.3823	5.69368	1.33	11.73	32.455	0.3869
62.3823	5.69368	1.37446	11.7301	32.4554	0.3869
62.3823	5.69369	1.71	11.731	32.458	0.380454
62.3823	5.69369	1.75797	11.7311	32.458	0.3796
62.3823	5.6937	2.12	11.732	32.458	0.411829
62.3823	5.6937	2.1785	11.7318	32.4576	0.4161
62.3823	5.69372	2.62	11.73	32.455	0.422546
62.3823	5.69372	2.68318	11.73	32.4551	0.4234
62.3822	5.69373	3.16	11.73	32.456	0.436292
62.3822	5.69373	3.22793	11.73	32.4559	0.438
62.3822	5.69373	3.74	11.73	32.455	0.463754
62.3822	5.69373	3.80726	11.73	32.4549	0.4672
62.3822	5.69373	4.31	11.73	32.454	0.483297
62.3822	5.69373	4.89	11.73	32.455	0.501547
62.3822	5.69373	4.95962	11.73	32.4551	0.5037
62.3822	5.69372	5.48	11.73	32.456	0.497261
62.3822	5.69372	5.54837	11.7301	32.4559	0.4964
62.3821	5.69372	6.06	11.731	32.455	0.522184
62.3821	5.69371	6.12669	11.7312	32.4551	0.5256
62.3821	5.69371	6.63	11.733	32.456	0.551384
62.3821	5.6937	6.69786	11.7334	32.4566	0.5548
62.3821	5.69369	7.21	11.736	32.461	0.593475
62.3821	5.69369	7.27793	11.7368	32.4615	0.5986
62.3821	5.69368	7.79	11.743	32.465	0.5986
62.3821	5.69368	7.85726	11.743	32.465	0.5986
62.3821	5.69367	8.36	11.743	32.465	0.605039
62.3821	5.69367	8.4249	11.7424	32.4648	0.6059
62.3821	5.69366	8.91	11.738	32.463	0.631654
62.382	5.69366	8.9749	11.7386	32.4635	0.6351
62.382	5.69366	9.46	11.743	32.467	0.628661
62.382	5.69365	9.99	11.749	32.467	0.621361
62.382	5.69365	10.0514	11.7515	32.4692	0.6205
62.382	5.69364	10.51	11.77	32.486	0.614061
62.382	5.69364	10.5714	11.7679	32.4842	0.6132
62.382	5.69363	11.03	11.752	32.471	0.645393
62.382	5.69363	11.0937	11.752	32.4711	0.6497
62.382	5.69362	11.57	11.752	32.472	0.636823
62.382	5.69362	11.629	11.7535	32.4724	0.6351
62.3819	5.69361	12.07	11.765	32.475	0.660854
62.3819	5.69361	12.1314	11.7682	32.4789	0.6643
62.3819	5.6936	12.59	11.792	32.508	0.657861
62.3819	5.6936	12.6478	11.7927	32.5079	0.657
62.3819	5.69359	13.08	11.798	32.507	0.663439
62.3819	5.69359	13.1378	11.7987	32.5076	0.6643
62.3819	5.69358	13.57	11.804	32.512	0.644984
62.3819	5.69358	13.6266	11.8044	32.5126	0.6424
62.3819	5.69358	14.05	11.807	32.517	0.645619
62.3819	5.69357	14.51	11.809	32.519	0.649269
62.3819	5.69357	14.5655	11.8091	32.519	0.6497
62.3818	5.69356	14.98	11.81	32.519	0.656139
62.3818	5.69356	15.0355	11.8094	32.519	0.657
62.3818	5.69355	15.45	11.805	32.519	0.669877
62.3818	5.69355	15.5031	11.8045	32.5177	0.6716
62.3818	5.69355	15.9	11.801	32.508	0.652284
62.3818	5.69354	15.9519	11.8014	32.5085	0.6497
62.3818	5.69354	16.34	11.804	32.512	0.636823
62.3818	5.69354	16.3943	11.8039	32.512	0.6351
62.3818	5.69353	16.8	11.803	32.512	0.641539
62.3818	5.69353	16.8519	11.8024	32.5111	0.6424
62.3818	5.69352	17.24	11.798	32.504	0.655277
62.3818	5.69352	17.2907	11.7989	32.5049	0.657
62.3817	5.69351	17.67	11.806	32.512	0.631246
62.3817	5.69351	17.7196	11.8062	32.5124	0.6278
62.3817	5.69351	18.09	11.808	32.515	0.647116
62.3817	5.6935	18.53	11.81	32.516	0.669016
62.3817	5.6935	18.5819	11.8104	32.5165	0.6716
62.3817	5.69349	18.97	11.813	32.52	0.665161
62.3817	5.69349	19.0207	11.813	32.5202	0.6643
62.3817	5.69349	19.4	11.813	32.522	0.677177
62.3817	5.69348	19.4507	11.8113	32.5216	0.6789
62.3817	5.69348	19.83	11.799	32.519	0.6789
62.3817	5.69348	19.8807	11.7983	32.5194	0.6789
62.3817	5.69347	20.26	11.793	32.522	0.6789
62.3817	5.69347	20.3107	11.7931	32.5221	0.6789
62.3816	5.69346	20.69	11.794	32.523	0.685339
62.3816	5.69346	20.7396	11.7942	32.5231	0.6862
62.3816	5.69346	21.11	11.796	32.524	0.6862
62.3816	5.69345	21.1596	11.7964	32.5241	0.6862
62.3816	5.69345	21.53	11.799	32.525	0.673323
62.3816	5.69345	21.5772	11.7994	32.5251	0.6716
62.3816	5.69344	21.93	11.802	32.526	0.684477
62.3816	5.69343	22.35	11.811	32.532	0.699077
62.3816	5.69343	22.3972	11.8112	32.5326	0.7008
62.3816	5.69343	22.75	11.813	32.537	0.694361
62.3816	5.69342	22.796	11.813	32.537	0.6935
62.3816	5.69342	23.14	11.813	32.537	0.687061
62.3816	5.69342	23.1884	11.8129	32.5371	0.6862
62.3815	5.69341	23.55	11.812	32.538	0.699077
62.3815	5.69341	23.5972	11.8119	32.538	0.7008
62.3815	5.6934	23.95	11.811	32.538	0.681484
62.3815	5.6934	23.9972	11.8112	32.5381	0.6789
62.3815	5.6934	24.35	11.813	32.539	0.691777
62.3815	5.6934	24.3972	11.8131	32.539	0.6935
62.3815	5.69339	24.75	11.814	32.539	0.6935
62.3815	5.69339	24.796	11.8142	32.5394	0.6935
62.3815	5.69338	25.14	11.816	32.542	0.680623
62.3815	5.69338	25.186	11.8188	32.5433	0.6789
62.3815	5.69338	25.53	11.84	32.553	0.685339
62.3815	5.69337	25.93	11.849	32.552	0.692639
62.3815	5.69337	25.9748	11.8498	32.5521	0.6935
62.3814	5.69336	26.31	11.856	32.553	0.706377
62.3814	5.69336	26.356	11.8569	32.5534	0.7081
62.3814	5.69336	26.7	11.864	32.556	0.688784
62.3814	5.69335	26.746	11.8636	32.5559	0.6862
62.3814	5.69335	27.09	11.861	32.555	0.705516
62.3814	5.69335	27.1348	11.8606	32.555	0.7081
62.3814	5.69334	27.47	11.858	32.555	0.714539
62.3814	5.69334	27.5148	11.8597	32.5554	0.7154
62.3814	5.69334	27.85	11.872	32.558	0.689646
62.3814	5.69333	27.8937	11.872	32.558	0.6862
62.3814	5.69333	28.22	11.872	32.558	0.724832
62.3814	5.69333	28.2648	11.8728	32.5582	0.73
62.3814	5.69332	28.6	11.879	32.56	0.717123
62.3814	5.69332	28.6437	11.8803	32.5608	0.7154
62.3813	5.69331	28.97	11.89	32.567	0.721839
62.3813	5.69331	29.34	11.898	32.57	0.729139
62.3813	5.69331	29.3848	11.9006	32.5706	0.73
62.3813	5.6933	29.72	11.92	32.575	0.762193
62.3813	5.6933	29.7637	11.9235	32.5769	0.7665
62.3813	5.6933	30.09	11.95	32.591	0.772939
62.3813	5.6933	30.1348	11.954	32.5925	0.7738
62.3813	5.69329	30.47	11.984	32.604	0.786677
62.3813	5.69329	30.5137	11.9901	32.6068	0.7884
62.3813	5.69328	30.84	12.036	32.628	0.781969
62.3813	5.69328	30.8852	12.0389	32.6318	0.7811
62.3813	5.69328	31.22	12.06	32.66	0.716787
62.3813	5.69328	31.2652	12.0561	32.6621	0.7081
62.3813	5.69327	31.6	12.027	32.678	0.66303
62.3813	5.69327	31.6437	12.0094	32.6811	0.657
62.3812	5.69326	31.97	11.878	32.704	0.637684
62.3812	5.69326	32.0148	11.8448	32.712	0.6351
62.3812	5.69326	32.35	11.597	32.772	0.6351
62.3812	5.69325	32.71	11.514	32.826	0.6351
62.3812	5.69325	32.7525	11.5079	32.8291	0.6351
62.3812	5.69325	33.07	11.462	32.852	0.602907
62.3812	5.69325	33.1113	11.4529	32.8565	0.5986
62.3812	5.69324	33.42	11.385	32.89	0.572846
62.3812	5.69324	33.4483	11.3715	32.896	0.5694
62.3812	5.69323	33.66	11.271	32.941	0.543646
62.3812	5.69323	33.6612	11.2691	32.9463	0.5402
62.3812	5.69323	33.67	11.255	32.986	0.533761
62.3812	5.69323	33.6464	11.2605	32.9846	0.5329
62.3812	5.69322	33.47	11.302	32.974	0.513584
62.3812	5.69322	33.4334	11.3062	32.9695	0.511
62.3811	5.69321	33.16	11.338	32.936	0.530316
62.3811	5.69321	33.1139	11.3412	32.9341	0.5329
62.3811	5.69321	32.77	11.365	32.92	0.539331
62.3811	5.69321	32.7201	11.3708	32.9186	0.5402
62.3811	5.6932	32.35	11.414	32.908	0.553077
62.3811	5.6932	31.91	11.467	32.882	0.567677
62.3811	5.69319	31.8557	11.478	32.8785	0.5694
62.3811	5.69319	31.45	11.56	32.852	0.601593
62.3811	5.69319	31.3968	11.5989	32.8459	0.6059
62.3811	5.69318	31	11.889	32.8	0.638057
62.3811	5.69318	30.9464	11.9042	32.7886	0.6424
62.3811	5.69318	30.55	12.017	32.704	0.674557
62.3811	5.69317	30.4964	12.0238	32.7003	0.6789
62.381	5.69317	30.1	12.074	32.673	0.73035
62.381	5.69317	30.0465	12.0714	32.6716	0.7373
62.381	5.69316	29.65	12.052	32.661	0.756594
62.381	5.69316	29.5965	12.0405	32.6542	0.7592
62.381	5.69315	29.2	11.955	32.604	0.752769
62.381	5.69315	29.1465	11.9514	32.6027	0.7519
62.381	5.69315	28.75	11.925	32.593	0.745469
62.381	5.69314	28.6976	11.9219	32.5907	0.7446
62.381	5.69314	28.31	11.899	32.574	0.718875
62.381	5.69313	27.87	11.884	32.564	0.689675
62.381	5.69313	27.8165	11.8832	32.5635	0.6862
62.381	5.69312	27.42	11.877	32.56	0.711954
62.381	5.69312	27.3669	11.8764	32.5596	0.7154
62.3809	5.69312	26.97	11.872	32.557	0.734716
62.3809	5.69311	26.918	11.8706	32.5565	0.7373
62.3809	5.69311	26.53	11.86	32.553	0.718006
62.3809	5.69311	26.4776	11.8595	32.5525	0.7154
62.3809	5.6931	26.09	11.856	32.549	0.721831
62.3809	5.6931	26.0388	11.8554	32.5489	0.7227
62.3809	5.6931	25.66	11.851	32.548	0.716269
62.3809	5.69309	25.6088	11.8493	32.5473	0.7154
62.3809	5.69309	25.23	11.837	32.542	0.708969
62.3809	5.69309	25.1788	11.8359	32.5413	0.7081
62.3809	5.69308	24.8	11.828	32.536	0.695237
62.3809	5.69308	24.7488	11.8276	32.536	0.6935
62.3809	5.69308	24.37	11.825	32.536	0.690284
62.3808	5.69307	23.94	11.824	32.534	0.686634
62.3808	5.69307	23.8876	11.8232	32.5338	0.6862
62.3808	5.69306	23.5	11.817	32.532	0.699063
62.3808	5.69306	23.4477	11.8165	32.532	0.7008
62.3808	5.69306	23.06	11.813	32.532	0.7008
62.3808	5.69306	23.0092	11.813	32.5319	0.7008
62.3808	5.69305	22.63	11.813	32.531	0.681506
62.3808	5.69305	22.5788	11.8112	32.5305	0.6789
62.3808	5.69304	22.2	11.798	32.527	0.698194
62.3808	5.69304	22.1488	11.7973	32.5265	0.7008
62.3808	5.69304	21.77	11.792	32.523	0.713663
62.3808	5.69303	21.7188	11.7919	32.5228	0.7154
62.3808	5.69303	21.34	11.791	32.521	0.683244
62.3808	5.69303	21.2888	11.7914	32.521	0.6789
62.3807	5.69302	20.91	11.794	32.521	0.691763
62.3807	5.69302	20.8612	11.7938	32.5208	0.6935
62.3807	5.69302	20.5	11.792	32.519	0.690284
62.3807	5.69301	20.08	11.79	32.516	0.686634
62.3807	5.69301	20.0288	11.7892	32.5158	0.6862
62.3807	5.693	19.65	11.783	32.514	0.679769
62.3807	5.693	19.6012	11.7828	32.5136	0.6789
62.3807	5.693	19.24	11.781	32.511	0.666037
62.3807	5.69299	19.1888	11.7809	32.5109	0.6643
62.3807	5.69299	18.81	11.78	32.51	0.690025
62.3807	5.69299	18.76	11.7799	32.51	0.6935
62.3807	5.69298	18.39	11.779	32.51	0.674206
62.3807	5.69298	18.3388	11.7789	32.5099	0.6716
62.3807	5.69298	17.96	11.778	32.509	0.710188
62.3807	5.69297	17.91	11.7779	32.5089	0.7154
62.3806	5.69297	17.54	11.777	32.508	0.689675
62.3806	5.69297	17.4901	11.7769	32.5078	0.6862
62.3806	5.69296	17.12	11.776	32.506	0.6862
62.3806	5.69296	16.7	11.777	32.506	0.6862
62.3806	5.69296	16.6512	11.7769	32.506	0.6862
62.3806	5.69295	16.29	11.776	32.506	0.6862
62.3806	5.69295	16.2412	11.7761	32.5059	0.6862
62.3806	5.69294	15.88	11.777	32.505	0.699063
62.3806	5.69294	15.8288	11.777	32.5049	0.7008
62.3806	5.69294	15.45	11.777	32.504	0.675075
62.3806	5.69294	15.4	11.7769	32.504	0.6716
62.3806	5.69293	15.03	11.776	32.504	0.684463
62.3806	5.69293	14.9788	11.7756	32.504	0.6862
62.3805	5.69292	14.6	11.773	32.504	0.673337
62.3805	5.69292	14.5476	11.7732	32.5038	0.6716
62.3805	5.69292	14.16	11.775	32.502	0.665169
62.3805	5.69292	14.11	11.7757	32.5018	0.6643
62.3805	5.69291	13.74	11.781	32.5	0.657869
62.3805	5.69291	13.6901	11.7818	32.5002	0.657
62.3805	5.6929	13.32	11.788	32.502	0.650561
62.3805	5.6929	12.9	11.788	32.498	0.643269
62.3805	5.6929	12.8512	11.7878	32.4981	0.6424
62.3805	5.69289	12.49	11.786	32.499	0.655263
62.3805	5.69289	12.44	11.7859	32.499	0.657
62.3805	5.69288	12.07	11.785	32.499	0.657
62.3805	5.69288	12.0212	11.7848	32.4983	0.657
62.3805	5.69288	11.66	11.783	32.493	0.650569
62.3805	5.69287	11.61	11.7832	32.4932	0.6497
62.3804	5.69287	11.24	11.785	32.495	0.643269
62.3804	5.69287	11.1912	11.7831	32.494	0.6424
62.3804	5.69286	10.83	11.769	32.487	0.661694
62.3804	5.69286	10.7788	11.7698	32.4869	0.6643
62.3804	5.69286	10.4	11.776	32.486	0.677163
62.3804	5.69286	10.3524	11.7765	32.4867	0.6789
62.3804	5.69285	10	11.78	32.492	0.666037
62.3804	5.69285	9.9524	11.78	32.4918	0.6643
62.3804	5.69284	9.6	11.78	32.49	0.6643
62.3804	5.69284	9.2	11.777	32.489	0.6643
62.3804	5.69284	9.1524	11.7766	32.4889	0.6643
62.3804	5.69283	8.8	11.774	32.488	0.657869
62.3804	5.69283	8.7524	11.7725	32.487	0.657
62.3803	5.69282	8.4	11.761	32.48	0.657
62.3803	5.69282	8.35121	11.7602	32.4785	0.657
62.3803	5.69282	7.99	11.754	32.467	0.657
62.3803	5.69282	7.9424	11.7539	32.4677	0.657
62.3803	5.69281	7.59	11.753	32.473	0.650569
62.3803	5.69281	7.5424	11.7513	32.4713	0.6497
62.3803	5.69281	7.19	11.739	32.459	0.636837
62.3803	5.6928	7.14121	11.7392	32.4589	0.6351
62.3803	5.6928	6.78	11.741	32.458	0.641531
62.3803	5.6928	6.73121	11.7412	32.4588	0.6424
62.3803	5.69279	6.37	11.743	32.465	0.635969
62.3803	5.69279	6.32121	11.7424	32.4639	0.6351
62.3803	5.69278	5.96	11.738	32.456	0.622237
62.3803	5.69278	5.56	11.745	32.466	0.607637
62.3803	5.69278	5.5124	11.744	32.4649	0.6059
62.3802	5.69277	5.16	11.737	32.457	0.618763
62.3802	5.69277	5.11359	11.7368	32.4566	0.6205
62.3802	5.69277	4.77	11.735	32.454	0.614069
62.3802	5.69277	4.72478	11.7354	32.4541	0.6132
62.3802	5.69276	4.39	11.738	32.455	0.555318
62.3802	5.69276	4.34597	11.7384	32.4555	0.5475
62.3802	5.69276	4.02	11.741	32.459	0.553931
62.3802	5.69276	3.97954	11.741	32.4591	0.5548
62.3802	5.69276	3.68	11.741	32.46	0.561231
62.3802	5.69276	3.63716	11.7408	32.4596	0.5621
62.3802	5.69276	3.32	11.739	32.457	0.542806
62.3802	5.69276	3.27597	11.739	32.4571	0.5402
62.3802	5.69277	2.95	11.739	32.458	0.520906
62.3802	5.69277	2.90478	11.7394	32.4579	0.5183
62.3802	5.69278	2.57	11.742	32.457	0.511869
62.3802	5.69279	2.18	11.74	32.459	0.504569
62.3802	5.69279	2.1324	11.7396	32.4585	0.5037
62.3801	5.69281	1.78	11.737	32.455	0.471544
62.3801	5.69281	1.73835	11.7366	32.4551	0.4672
62.3801	5.69283	1.43	11.734	32.456	0.473631
62.3801	5.69283	1.40144	11.7338	32.4555	0.4745
62.3801	5.69284	1.19	11.732	32.452	0.448775
62.3801	5.69285	1.16739	11.7321	32.452	0.4453
62.3801	5.69285	1	11.733	32.452	0.451731
62.3801	5.69285	0.9643	11.7329	32.4521	0.4526
62.3801	5.69285	0.7	11.732	32.453	0.420443
62.3801	5.69285	0.6643	11.7321	32.453	0.4161
62.3801	5.69285	0.4	11.733	32.453	0.409669
62.3801	5.69285	0.37858	11.7328	32.4529	0.4088
62.3801	5.69285	0.22	11.731	32.452	0.421663
62.3801	5.69285	0.19977	11.7304	32.4519	0.4234
62.3801	5.69285	0.05	11.726	32.451	0.420184
62.3801	5.69285	0.19	11.633	22.362	0.416538
62.3801	5.69285	0.191199	11.6441	22.989	0.4161
62.3801	5.69285	0.2	11.726	27.592	0.441825
62.3801	5.69285	0.19048	11.7262	28.1684	0.4453
62.3801	5.69284	0.12	11.728	32.436	0.438869
62.3801	5.69284	0.10929	11.7275	32.4312	0.438
62.3801	5.69284	0.03	11.724	32.396	0.418706
62.3801	5.69284	0.0454855	11.7149	31.5604	0.4161
62.3801	5.69284	0.16	11.648	25.381	0.396828
62.3801	5.69281	0.161199	11.6572	25.0928	0.3942
62.3801	5.69258	0.17	11.725	22.977	0.439219
62.3801	5.69258	0.16048	11.7252	24.0977	0.4453
62.3801	5.69258	0.09	11.727	32.395	0.432437
62.3801	5.69258	0.08881	11.7266	32.3799	0.4307
62.3801	5.69258	0.08	11.724	32.268	0.4307
62.3801	5.69258	0.07524	11.7232	32.2886	0.4307
62.3801	5.69259	0.04	11.717	32.441	0.427484
62.38	5.69258	0.07	11.72	32.452	0.423834
62.38	5.69258	0.0676176	11.7181	31.3656	0.4234
62.38	5.69258	0.05	11.704	23.332	0.397704
62.38	5.69258	0.05	11.7052	24.2883	0.3942
62.38	5.69258	0.05	11.714	31.309	0.452082
62.38	5.69258	0.05	11.7147	30.6369	0.4599
62.38	5.69258	0.05	11.72	25.661	0.447037
62.38	5.69258	0.05357	11.7185	26.4404	0.4453
62.38	5.69258	0.08	11.707	32.211	0.471025
62.38	5.69258	0.07524	11.709	32.0781	0.4745
62.38	5.69258	0.04	11.724	31.094	0.448775
62.38	5.69258	0.04833	11.724	31.2504	0.4453
62.38	5.69257	0.11	11.724	32.408	0.406712
62.38	5.69257	0.11119	11.7242	32.4124	0.4015
62.38	5.69256	0.12	11.726	32.445	0.407931
62.38	5.69255	0.11524	11.7264	32.4456	0.4088
62.38	5.69254	0.08	11.729	32.45	0.405584
62.38	5.69251	0.12	11.724	32.451	0.401934
62.38	5.6925	0.11524	11.7238	32.4509	0.4015
62.38	5.69248	0.08	11.722	32.45	0.4015
62.38	5.69247	0.0835664	11.7222	32.45	0.4015
62.38	5.69245	0.11	11.724	32.45	0.414377
62.38	5.69244	0.105275	11.7242	32.4498	0.4161
62.38	5.69242	0.07	11.726	32.448	0.409669
62.38	5.69241	0.07	11.7258	32.4482	0.4088
62.38	5.69239	0.07	11.724	32.45	0.395937
62.38	5.69238	0.07357	11.7244	32.4501	0.3942
62.38	5.69236	0.1	11.727	32.451	0.400631
62.3801	5.69235	0.10357	11.7268	32.4508	0.4015
62.3801	5.69233	0.13	11.725	32.449	0.4015
62.3801	5.69233	0.12524	11.7252	32.4491	0.4015
62.3801	5.69231	0.09	11.727	32.45	0.414363
62.3801	5.69231	0.09476	11.7268	32.45	0.4161
62.3801	5.69232	0.13	11.725	32.45	0.406453
62.3801	5.69231	0.12	11.729	32.451	0.395503
62.3801	5.69231	0.11643	11.7289	32.4514	0.3942
62.3801	5.69231	0.09	11.728	32.454	0.400631
62.3801	5.69231	0.11261	11.7284	32.4454	0.4015
62.3801	5.69233	0.28	11.731	32.382	0.395069
62.3801	5.69233	0.28357	11.7311	32.3903	0.3942
62.3802	5.69234	0.31	11.732	32.452	0.407063
62.3802	5.69235	0.27668	11.7319	32.452	0.4088
62.3802	5.69236	0.03	11.731	32.452	0.4088
62.3802	5.69236	0.03	11.7302	30.7362	0.4088
62.3802	5.6924	0.03	11.724	18.048	0.485888
62.3802	5.69241	0.0276	11.7194	17.1691	0.4964
62.3802	5.69246	0.01	11.686	10.724	1.23516
62.3802	5.69246	0.0124024	11.6792	11.5782	1.3359
62.3802	5.69249	0.03	11.629	17.835	0.540229
62.3802	5.69249	0.0396703	11.6336	16.2288	0.4307
62.3802	5.6925	0.11	11.667	4.547	0.427488
62.3802	5.69253	0.31	11.726	12.974	0.423834
62.3802	5.69253	0.31833	11.7265	15.2915	0.4234
62.3802	5.69254	0.38	11.73	32.449	0.429831
62.3802	5.69254	0.38833	11.73	32.4466	0.4307
62.3802	5.69259	0.45	11.73	32.429	0.437131
62.3802	5.69259	0.45595	11.7301	32.4319	0.438
62.3802	5.69262	0.5	11.731	32.453	0.431569
62.3802	5.69262	0.5	11.731	32.4532	0.4307
62.3802	5.69263	0.5	11.731	32.455	0.437131
62.3802	5.69264	0.50238	11.7311	32.4548	0.438
62.3802	5.69266	0.52	11.732	32.453	0.450863
62.3802	5.69266	0.52238	11.7321	32.453	0.4526
62.3802	5.69268	0.54	11.733	32.453	0.446169
62.3802	5.69268	0.54714	11.7325	32.453	0.4453
62.3802	5.6927	0.6	11.729	32.453	0.458163
62.3802	5.6927	0.61071	11.7291	32.453	0.4599
62.3802	5.69272	0.69	11.73	32.453	0.450253
62.3802	5.69274	0.84	11.729	32.452	0.439303
62.3802	5.69274	0.86261	11.7292	32.4521	0.438
62.3802	5.69274	1.03	11.731	32.453	0.438
62.3802	5.69273	1.05382	11.7311	32.453	0.438
62.3802	5.69272	1.23	11.732	32.453	0.463696
62.3802	5.69272	1.2612	11.7319	32.4529	0.4672
62.3802	5.69273	1.49	11.731	32.452	0.447928
62.3802	5.69273	1.52956	11.731	32.452	0.4453
62.3801	5.69272	1.82	11.731	32.452	0.483888
62.3801	5.69272	1.8605	11.7311	32.4519	0.4891
62.3801	5.69272	2.16	11.732	32.451	0.514796
62.3801	5.69271	2.2068	11.7321	32.4512	0.5183
62.3801	5.6927	2.55	11.733	32.453	0.531148
62.3801	5.6927	2.6016	11.7329	32.453	0.5329
62.3801	5.69268	2.98	11.732	32.453	0.539324
62.3801	5.69267	3.0316	11.7319	32.453	0.5402
62.3801	5.69265	3.41	11.731	32.453	0.553048
62.3801	5.69262	3.85	11.73	32.451	0.567648
62.3801	5.69262	3.9004	11.73	32.451	0.5694
62.3801	5.69259	4.27	11.73	32.451	0.5694
62.3801	5.69259	4.3204	11.7301	32.451	0.5694
62.3801	5.69256	4.69	11.731	32.451	0.595096
62.3801	5.69255	4.7404	11.7312	32.4514	0.5986
62.3801	5.69253	5.11	11.733	32.454	0.605024
62.3801	5.69252	5.1592	11.733	32.4539	0.6059
62.3801	5.6925	5.52	11.733	32.453	0.6059
62.3801	5.6925	5.5704	11.733	32.453	0.6059
62.3801	5.69248	5.94	11.733	32.453	0.618748
62.3801	5.69247	5.9916	11.7329	32.453	0.6205
62.3801	5.69245	6.37	11.732	32.453	0.594804
62.3801	5.69245	6.4228	11.7321	32.4531	0.5913
62.3801	5.69243	6.81	11.733	32.454	0.610572
62.3801	5.69243	6.864	11.7347	32.4546	0.6132
62.3801	5.69241	7.26	11.747	32.459	0.622836
62.3802	5.69238	7.71	11.748	32.46	0.633786
62.3802	5.69238	7.7652	11.7485	32.4612	0.6351
62.3802	5.69235	8.17	11.752	32.47	0.628676
62.3802	5.69235	8.2228	11.7528	32.4707	0.6278
62.3802	5.69232	8.61	11.759	32.476	0.6278
62.3802	5.69232	8.664	11.7597	32.476	0.6278
62.3802	5.69229	9.06	11.765	32.476	0.647072
62.3802	5.69229	9.1116	11.7661	32.4783	0.6497
62.3802	5.69226	9.49	11.774	32.495	0.668972
62.3802	5.69225	9.5392	11.7739	32.4951	0.6716
62.3802	5.69223	9.9	11.773	32.496	0.6716
62.3802	5.69222	9.9528	11.7728	32.4959	0.6716
62.3802	5.69219	10.34	11.771	32.495	0.658752
62.3802	5.69219	10.3928	11.7711	32.4952	0.657
62.3802	5.69216	10.78	11.772	32.497	0.657
62.3802	5.69215	10.8352	11.7724	32.4968	0.657
62.3802	5.69212	11.24	11.775	32.495	0.647364
62.3802	5.69209	11.69	11.777	32.495	0.636414
62.3802	5.69209	11.7452	11.777	32.4951	0.6351
62.3802	5.69206	12.15	11.777	32.496	0.647948
62.3802	5.69205	12.2064	11.7762	32.496	0.6497
62.3802	5.69202	12.62	11.77	32.496	0.656124
62.3802	5.69202	12.6728	11.7698	32.4964	0.657
62.3802	5.69199	13.06	11.768	32.499	0.657
62.3802	5.69198	13.1128	11.768	32.4989	0.657
62.3802	5.69195	13.5	11.768	32.498	0.682696
62.3802	5.69195	13.554	11.7681	32.4981	0.6862
62.3802	5.69192	13.95	11.769	32.499	0.673352
62.3802	5.69192	14.0016	11.7691	32.4991	0.6716
62.3802	5.69189	14.38	11.77	32.5	0.6716
62.3802	5.69188	14.4304	11.7704	32.5002	0.6716
62.3802	5.69185	14.8	11.773	32.502	0.658752
62.3802	5.69185	14.8516	11.7728	32.5019	0.657
62.3802	5.69182	15.23	11.771	32.501	0.666636
62.3802	5.69179	15.65	11.774	32.502	0.677586
62.3802	5.69178	15.7004	11.7741	32.502	0.6789
62.3802	5.69175	16.07	11.775	32.502	0.672476
62.3802	5.69175	16.118	11.7752	32.502	0.6716
62.3802	5.69172	16.47	11.777	32.502	0.678024
62.3802	5.69172	16.518	11.7777	32.5024	0.6789
62.3802	5.69169	16.87	11.783	32.505	0.685324
62.3802	5.69168	16.9192	11.7834	32.505	0.6862
62.3801	5.69166	17.28	11.786	32.505	0.679776
62.3801	5.69165	17.328	11.7864	32.5052	0.6789
62.3801	5.69162	17.68	11.789	32.507	0.691748
62.3801	5.69162	17.7292	11.7885	32.5071	0.6935
62.3801	5.69159	18.09	11.785	32.508	0.674228
62.3801	5.69159	18.138	11.7851	32.508	0.6716
62.3801	5.69156	18.49	11.786	32.508	0.690872
62.3801	5.69156	18.5368	11.7855	32.5078	0.6935
62.3801	5.69153	18.88	11.782	32.506	0.683864
62.3801	5.6915	19.28	11.78	32.507	0.672914
62.3801	5.69149	19.328	11.7812	32.5071	0.6716
62.3801	5.69147	19.68	11.79	32.508	0.697296
62.3801	5.69146	19.7268	11.7905	32.5084	0.7008
62.3801	5.69143	20.07	11.794	32.511	0.7008
62.3801	5.69143	20.1156	11.7941	32.5112	0.7008
62.3801	5.6914	20.45	11.795	32.513	0.7008
62.3801	5.6914	20.4968	11.7948	32.5129	0.7008
62.3801	5.69137	20.84	11.793	32.512	0.7008
62.3801	5.69137	20.8856	11.7932	32.5121	0.7008
62.3801	5.69134	21.22	11.795	32.513	0.681528
62.3801	5.69134	21.2668	11.7952	32.513	0.6789
62.3801	5.69131	21.61	11.797	32.513	0.704596
62.3801	5.69131	21.6568	11.797	32.5132	0.7081
62.3801	5.69128	22	11.797	32.515	0.7081
62.3801	5.69128	22.0456	11.798	32.5155	0.7081
62.3801	5.69125	22.38	11.805	32.519	0.704888
62.3801	5.69122	22.75	11.807	32.518	0.701238
62.3801	5.69122	22.798	11.8069	32.5184	0.7008
62.3801	5.69119	23.15	11.806	32.521	0.7008
62.3801	5.69119	23.1956	11.8062	32.5209	0.7008
62.3801	5.69116	23.53	11.808	32.52	0.694376
62.3801	5.69116	23.5756	11.8079	32.5201	0.6935
62.3801	5.69113	23.91	11.807	32.521	0.6935
62.3801	5.69113	23.9544	11.8074	32.5209	0.6935
62.3801	5.6911	24.28	11.81	32.52	0.719196
62.3801	5.6911	24.3256	11.8107	32.5205	0.7227
62.3801	5.69107	24.66	11.816	32.524	0.709852
62.3801	5.69107	24.7044	11.8164	32.5244	0.7081
62.3801	5.69104	25.03	11.819	32.527	0.7081
62.3801	5.69104	25.0744	11.8186	32.527	0.7081
62.3801	5.69101	25.4	11.816	32.527	0.701676
62.3801	5.69101	25.4432	11.8162	32.5268	0.7008
62.3801	5.69098	25.76	11.818	32.525	0.697588
62.3801	5.69095	26.13	11.821	32.528	0.693938
62.3801	5.69095	26.1744	11.8217	32.5282	0.6935
62.3801	5.69092	26.5	11.827	32.53	0.719196
62.3801	5.69092	26.5444	11.8268	32.5301	0.7227
62.3801	5.69089	26.87	11.825	32.531	0.7227
62.3801	5.69089	26.9144	11.8254	32.531	0.7227
62.3801	5.69086	27.24	11.828	32.531	0.697004
62.3801	5.69086	27.2856	11.8281	32.5312	0.6935
62.3801	5.69083	27.62	11.829	32.533	0.75774
62.3801	5.69083	27.6644	11.8296	32.5329	0.7665
62.3801	5.6908	27.99	11.834	32.532	0.721532
62.3801	5.6908	28.0332	11.8352	32.533	0.7154
62.3801	5.69078	28.35	11.844	32.54	0.708976
62.3801	5.69077	28.3932	11.8444	32.5402	0.7081
62.3801	5.69075	28.71	11.847	32.542	0.720948
62.3801	5.69074	28.7532	11.8465	32.5421	0.7227
62.3801	5.69072	29.07	11.843	32.543	0.7227
62.3801	5.69069	29.45	11.889	32.55	0.7227
62.3801	5.69068	29.4923	11.8935	32.553	0.7227
62.3801	5.69066	29.8	11.926	32.575	0.741972
62.3801	5.69065	29.8432	11.9328	32.5784	0.7446
62.3801	5.69063	30.16	11.983	32.603	0.77672
62.3801	5.69063	30.2044	11.9907	32.6061	0.7811
62.3801	5.6906	30.53	12.047	32.629	0.76185
62.3801	5.6906	30.5748	12.0506	32.6318	0.7592
62.3801	5.69057	30.9	12.077	32.652	0.746367
62.3801	5.69057	30.9424	12.049	32.6531	0.7446
62.3801	5.69054	31.25	11.846	32.661	0.693266
62.3801	5.69054	31.2935	11.8379	32.6655	0.6862
62.3801	5.69052	31.61	11.779	32.698	0.65408
62.3801	5.69051	31.6508	11.7719	32.6982	0.6497
62.3801	5.69049	31.95	11.72	32.7	0.68182
62.3801	5.69048	31.9932	11.7102	32.7044	0.6862
62.3801	5.69046	32.31	11.638	32.737	0.666928
62.3801	5.69043	32.66	11.555	32.808	0.645028
62.3801	5.69043	32.702	11.5508	32.8099	0.6424
62.3801	5.6904	33.01	11.52	32.824	0.623128
62.3801	5.6904	33.0532	11.508	32.8281	0.6205
62.3801	5.69038	33.37	11.42	32.858	0.594804
62.3801	5.69037	33.412	11.4051	32.8659	0.5913
62.3801	5.69035	33.72	11.296	32.924	0.572028
62.3801	5.69035	33.7644	11.2937	32.9278	0.5694
62.3801	5.69032	34.09	11.277	32.956	0.537316
62.3801	5.69032	34.1336	11.265	32.9573	0.5329
62.3801	5.69029	34.45	11.178	32.967	0.47515
62.3801	5.69029	34.4936	11.1647	32.9795	0.4672
62.3801	5.69027	34.81	11.068	33.07	0.454367
62.3801	5.69026	34.8524	11.0584	33.0733	0.4526
62.3801	5.69024	35.16	10.989	33.097	0.4526
62.3801	5.69024	35.2024	10.9813	33.1034	0.4526
62.3801	5.69021	35.51	10.925	33.15	0.4526
62.3801	5.69018	35.86	10.869	33.179	0.4526
62.3801	5.69018	35.9011	10.8575	33.1842	0.4526
62.3801	5.69016	36.2	10.774	33.222	0.465433
62.3801	5.69015	36.2424	10.7642	33.2319	0.4672
62.3801	5.69013	36.55	10.693	33.304	0.48645
62.3801	5.69012	36.5911	10.6851	33.3065	0.4891
62.3801	5.6901	36.89	10.628	33.325	0.463433
62.3801	5.6901	36.9323	10.6205	33.3411	0.4599
62.3801	5.69007	37.24	10.566	33.458	0.491983
62.3801	5.69007	37.2824	10.554	33.4651	0.4964
62.3801	5.69004	37.59	10.467	33.517	0.47715
62.3801	5.69004	37.6324	10.461	33.5208	0.4745
62.3801	5.69001	37.94	10.417	33.548	0.4745
62.3801	5.69001	37.9811	10.4014	33.5508	0.4745
62.3801	5.68998	38.28	10.288	33.571	0.448833
62.3801	5.68998	38.3224	10.2764	33.5781	0.4453
62.3801	5.68996	38.63	10.192	33.63	0.442092
62.3801	5.68993	38.97	10.053	33.68	0.438442
62.3801	5.68992	39.0111	10.0472	33.6828	0.438
62.3801	5.6899	39.31	10.005	33.703	0.412333
62.3801	5.6899	39.3524	9.99847	33.7054	0.4088
62.3801	5.68987	39.66	9.951	33.723	0.421633
62.3801	5.68987	39.7011	9.93696	33.7248	0.4234
62.3801	5.68984	40	9.835	33.738	0.397733
62.3801	5.68984	40.0411	9.8206	33.7441	0.3942
62.3801	5.68981	40.34	9.716	33.788	0.407033
62.3801	5.68981	40.3811	9.70838	33.7908	0.4088
62.3801	5.68978	40.68	9.653	33.811	0.363883
62.3801	5.68978	40.7211	9.64247	33.8123	0.3577
62.3801	5.68976	41.02	9.566	33.822	0.370533
62.3801	5.68975	41.0611	9.5608	33.8242	0.3723
62.3801	5.68973	41.36	9.523	33.84	0.35305
62.3801	5.68972	41.4011	9.51029	33.8424	0.3504
62.3801	5.6897	41.7	9.418	33.86	0.337567
62.3801	5.68967	42.05	9.112	33.911	0.322967
62.3801	5.68967	42.0924	9.11091	33.9184	0.3212
62.3801	5.68964	42.4	9.103	33.972	0.308367
62.3801	5.68964	42.4436	9.10082	33.9719	0.3066
62.3801	5.68961	42.76	9.085	33.971	0.319433
62.3801	5.68961	42.7999	9.08319	33.9714	0.3212
62.3801	5.68959	43.09	9.07	33.974	0.289117
62.3801	5.68958	43.1311	9.06443	33.9753	0.2847
62.3801	5.68956	43.43	9.024	33.985	0.2847
62.3801	5.68955	43.4711	9.01964	33.9872	0.2847
62.3801	5.68953	43.77	8.988	34.003	0.278283
62.3801	5.68953	43.8099	8.98268	34.0047	0.2774
62.3801	5.6895	44.1	8.944	34.017	0.283817
62.3801	5.6895	44.1411	8.93759	34.0182	0.2847
62.3801	5.68947	44.44	8.891	34.027	0.2847
62.3801	5.68947	44.4799	8.88834	34.0298	0.2847
62.3801	5.68945	44.77	8.869	34.05	0.275075
62.3801	5.68942	45.11	8.856	34.054	0.264125
62.3801	5.68941	45.1487	8.85055	34.0552	0.2628
62.3801	5.68939	45.43	8.811	34.064	0.269217
62.3801	5.68939	45.4687	8.80689	34.0663	0.2701
62.3801	5.68936	45.75	8.777	34.083	0.25085
62.3801	5.68936	45.7899	8.76647	34.0847	0.2482
62.3801	5.68933	46.08	8.69	34.097	0.22895
62.3801	5.68933	46.1199	8.68395	34.101	0.2263
62.38	5.68931	46.41	8.64	34.13	0.213467
62.38	5.6893	46.4499	8.63322	34.1312	0.2117
62.38	5.68928	46.74	8.584	34.14	0.2117
62.38	5.68928	46.7799	8.55363	34.1493	0.2117
62.38	5.68925	47.07	8.333	34.217	0.166783
62.38	5.68925	47.1111	8.32356	34.2278	0.1606
62.38	5.68922	47.41	8.255	34.306	0.186267
62.38	5.68922	47.4499	8.24883	34.309	0.1898
62.38	5.68919	47.74	8.204	34.331	0.173758
62.38	5.68917	47.98	8.035	34.386	0.155508
62.38	5.68916	47.9824	8.03331	34.3936	0.1533
62.38	5.68914	48	8.021	34.449	0.146883
62.38	5.68913	47.9782	8.02765	34.4483	0.146
62.38	5.68911	47.82	8.076	34.443	0.152417
62.38	5.6891	47.7837	8.09088	34.4349	0.1533
62.38	5.68908	47.52	8.199	34.376	0.1533
62.38	5.68907	47.474	8.20578	34.3715	0.1533
62.38	5.68905	47.14	8.255	34.339	0.159717
62.38	5.68904	47.0904	8.26032	34.3369	0.1606
62.38	5.68902	46.73	8.299	34.322	0.167017
62.38	5.68901	46.6768	8.3082	34.3176	0.1679
62.38	5.68898	46.29	8.375	34.286	0.180733
62.38	5.68898	46.2368	8.39714	34.2802	0.1825
62.38	5.68895	45.85	8.558	34.238	0.214583
62.38	5.68895	45.7955	8.56599	34.2288	0.219
62.38	5.68892	45.4	8.624	34.162	0.225417
62.38	5.68889	44.94	8.809	34.108	0.232717
62.38	5.68889	44.8868	8.8159	34.103	0.2336
62.38	5.68886	44.5	8.866	34.067	0.2336
62.38	5.68886	44.4468	8.86782	34.0653	0.2336
62.38	5.68883	44.06	8.881	34.053	0.25285
62.38	5.68883	44.0055	8.88608	34.0523	0.2555
62.38	5.6888	43.61	8.923	34.047	0.268333
62.38	5.6888	43.5579	8.93342	34.0449	0.2701
62.38	5.68877	43.18	9.009	34.03	0.282919
62.38	5.68876	43.1276	9.0257	34.0231	0.2847
62.38	5.68874	42.75	9.146	33.973	0.30395
62.38	5.68873	42.6955	9.18	33.9665	0.3066
62.38	5.68871	42.3	9.427	33.919	0.332267
62.38	5.6887	42.2468	9.43644	33.9122	0.3358
62.38	5.68868	41.86	9.505	33.863	0.342217
62.38	5.68867	41.8068	9.51432	33.8605	0.3431
62.38	5.68865	41.42	9.582	33.842	0.349517
62.38	5.68862	40.98	9.705	33.811	0.356817
62.38	5.68861	40.9268	9.71795	33.8079	0.3577
62.38	5.68859	40.54	9.812	33.785	0.37695
62.38	5.68858	40.4868	9.81926	33.781	0.3796
62.38	5.68856	40.1	9.872	33.752	0.392433
62.38	5.68856	40.048	9.87527	33.751	0.3942
62.38	5.68853	39.67	9.899	33.744	0.37495
62.38	5.68853	39.618	9.9082	33.7434	0.3723
62.38	5.6885	39.24	9.975	33.739	0.39155
62.38	5.6885	39.1868	9.98649	33.7361	0.3942
62.38	5.68847	38.8	10.07	33.715	0.419867
62.38	5.68847	38.7492	10.0976	33.7109	0.4234
62.38	5.68844	38.38	10.298	33.681	0.44265
62.38	5.68844	38.3292	10.3102	33.6691	0.4453
62.38	5.68841	37.96	10.399	33.583	0.46455
62.38	5.68841	37.9092	10.4187	33.579	0.4672
62.38	5.68838	37.54	10.562	33.55	0.460783
62.38	5.68835	37.12	10.635	33.412	0.453483
62.38	5.68835	37.0692	10.6396	33.4033	0.4526
62.38	5.68832	36.7	10.673	33.34	0.446183
62.38	5.68832	36.6492	10.6809	33.3364	0.4453
62.38	5.68829	36.28	10.738	33.31	0.458133
62.38	5.68829	36.2268	10.7462	33.3021	0.4599
62.38	5.68826	35.84	10.806	33.245	0.44065
62.38	5.68826	35.7892	10.8088	33.2427	0.438
62.38	5.68823	35.42	10.829	33.226	0.438
62.38	5.68823	35.368	10.8326	33.2247	0.438
62.38	5.68821	34.99	10.859	33.215	0.431583
62.38	5.6882	34.938	10.869	33.2128	0.4307
62.38	5.68818	34.56	10.942	33.197	0.44995
62.38	5.68817	34.5091	10.9625	33.1832	0.4526
62.38	5.68815	34.14	11.111	33.083	0.459009
62.38	5.68814	34.0888	11.1203	33.0758	0.4599
62.38	5.68812	33.72	11.187	33.024	0.466309
62.38	5.68809	33.29	11.252	32.988	0.473617
62.38	5.68809	33.2368	11.2671	32.9823	0.4745
62.38	5.68806	32.85	11.377	32.941	0.525834
62.38	5.68806	32.798	11.3881	32.9345	0.5329
62.38	5.68803	32.42	11.469	32.887	0.577817
62.38	5.68803	32.368	11.4777	32.8823	0.584
62.38	5.68801	31.99	11.541	32.848	0.584
62.38	5.688	31.938	11.5472	32.8433	0.584
62.38	5.68798	31.56	11.592	32.809	0.616084
62.38	5.68797	31.5092	11.5971	32.8059	0.6205
62.38	5.68795	31.14	11.634	32.783	0.652584
62.38	5.68795	31.0892	11.648	32.7776	0.657
62.38	5.68792	30.72	11.75	32.738	0.689083
62.38	5.68792	30.668	11.7704	32.731	0.6935
62.38	5.68789	30.29	11.919	32.68	0.744834
62.38	5.68789	30.2379	11.9339	32.6744	0.7519
62.38	5.68786	29.86	12.042	32.634	0.764719
62.38	5.68783	29.44	11.999	32.626	0.779333
62.38	5.68783	29.3891	11.9912	32.6209	0.7811
62.38	5.6878	29.02	11.935	32.584	0.761872
62.38	5.6878	28.9688	11.9262	32.581	0.7592
62.38	5.68777	28.6	11.863	32.559	0.752783
62.38	5.68777	28.548	11.8611	32.5571	0.7519
62.38	5.68775	28.17	11.847	32.543	0.719816
62.38	5.68774	28.1191	11.8465	32.5424	0.7154
62.38	5.68772	27.75	11.843	32.538	0.7154
62.38	5.68771	27.7	11.8425	32.5379	0.7154
62.38	5.68769	27.34	11.839	32.537	0.708983
62.38	5.68768	27.2904	11.8379	32.536	0.7081
62.38	5.68766	26.93	11.83	32.529	0.7081
62.38	5.68765	26.8804	11.8293	32.5289	0.7081
62.38	5.68763	26.52	11.824	32.528	0.695267
62.38	5.68763	26.4704	11.8242	32.5276	0.6935
62.38	5.6876	26.11	11.826	32.525	0.699917
62.38	5.68757	25.69	11.821	32.524	0.707217
62.38	5.68757	25.6416	11.8197	32.523	0.7081
62.38	5.68754	25.29	11.81	32.516	0.714517
62.38	5.68754	25.2391	11.8099	32.5162	0.7154
62.38	5.68751	24.87	11.809	32.518	0.702581
62.38	5.68751	24.8212	11.8084	32.5175	0.7008
62.38	5.68749	24.47	11.804	32.514	0.713633
62.38	5.68748	24.4192	11.8051	32.5147	0.7154
62.38	5.68746	24.05	11.813	32.52	0.702567
62.38	5.68745	24.0016	11.8118	32.5193	0.7008
62.38	5.68743	23.65	11.803	32.514	0.7008
62.38	5.68743	23.5991	11.8024	32.5136	0.7008
62.38	5.6874	23.23	11.798	32.511	0.694391
62.38	5.6874	23.18	11.7981	32.511	0.6935
62.38	5.68737	22.82	11.799	32.511	0.706319
62.38	5.68737	22.77	11.7981	32.5105	0.7081
62.38	5.68734	22.41	11.792	32.507	0.701683
62.38	5.68732	22.01	11.789	32.506	0.694391
62.38	5.68731	21.96	11.789	32.5059	0.6935
62.38	5.68729	21.6	11.789	32.505	0.699909
62.38	5.68728	21.5512	11.7891	32.5052	0.7008
62.38	5.68726	21.2	11.79	32.507	0.68155
62.38	5.68726	21.1503	11.7893	32.5069	0.6789
62.38	5.68723	20.79	11.784	32.506	0.6789
62.38	5.68723	20.7412	11.7829	32.505	0.6789
62.38	5.6872	20.39	11.775	32.498	0.6789
62.38	5.6872	20.34	11.7751	32.4982	0.6789
62.38	5.68717	19.98	11.776	32.5	0.685309
62.38	5.68717	19.93	11.7761	32.5	0.6862
62.38	5.68715	19.57	11.777	32.5	0.673381
62.38	5.68714	19.52	11.7765	32.4995	0.6716
62.38	5.68712	19.16	11.773	32.496	0.690828
62.38	5.68711	19.1112	11.7729	32.4959	0.6935
62.38	5.68709	18.76	11.772	32.495	0.687091
62.38	5.68706	18.35	11.771	32.495	0.679791
62.38	5.68706	18.3012	11.7709	32.495	0.6789
62.3799	5.68703	17.95	11.77	32.495	0.659672
62.3799	5.68703	17.8988	11.7701	32.495	0.657
62.3799	5.687	17.53	11.771	32.495	0.689047
62.3799	5.687	17.48	11.7711	32.4951	0.6935
62.3799	5.68697	17.12	11.772	32.496	0.661453
62.3799	5.68697	17.07	11.7719	32.4959	0.657
62.3799	5.68695	16.71	11.771	32.495	0.669819
62.3799	5.68694	16.6588	11.7706	32.4948	0.6716
62.3799	5.68692	16.29	11.768	32.493	0.6716
62.3799	5.68691	16.2412	11.768	32.493	0.6716
62.3799	5.68689	15.89	11.768	32.493	0.665191
62.3799	5.68688	15.8388	11.7678	32.4929	0.6643
62.3799	5.68686	15.47	11.766	32.492	0.677119
62.3799	5.68686	15.4188	11.766	32.492	0.6789
62.3799	5.68683	15.05	11.766	32.492	0.672491
62.3799	5.6868	14.64	11.766	32.489	0.665191
62.3799	5.6868	14.5888	11.766	32.4891	0.6643
62.3799	5.68677	14.22	11.766	32.49	0.670717
62.3799	5.68677	14.1691	11.7661	32.4899	0.6716
62.3799	5.68675	13.8	11.767	32.489	0.658781
62.3799	5.68674	13.75	11.7671	32.4886	0.657
62.3799	5.68672	13.39	11.768	32.486	0.663409
62.3799	5.68671	13.3388	11.7678	32.4859	0.6643
62.3799	5.68669	12.97	11.766	32.485	0.677119
62.3799	5.68668	12.9212	11.7658	32.4845	0.6789
62.3799	5.68666	12.57	11.764	32.481	0.672491
62.3799	5.68666	12.5212	11.764	32.4808	0.6716
62.3799	5.68663	12.17	11.764	32.479	0.645962
62.3799	5.68663	12.1212	11.7622	32.4764	0.6424
62.3799	5.6866	11.77	11.749	32.458	0.635991
62.3799	5.6866	11.7212	11.7478	32.4575	0.6351
62.3799	5.68657	11.37	11.739	32.454	0.6351
62.3799	5.68655	10.96	11.74	32.451	0.6351
62.3799	5.68654	10.91	11.74	32.4516	0.6351
62.3799	5.68652	10.55	11.74	32.456	0.641509
62.3799	5.68651	10.5012	11.7404	32.4559	0.6424
62.3799	5.68649	10.15	11.743	32.455	0.623172
62.3799	5.68649	10.1024	11.7426	32.4552	0.6205
62.3799	5.68646	9.76	11.74	32.457	0.6205
62.3799	5.68646	9.70876	11.7399	32.4566	0.6205
62.3799	5.68643	9.34	11.739	32.454	0.626909
62.3799	5.68643	9.2912	11.7386	32.4538	0.6278
62.3799	5.6864	8.94	11.736	32.452	0.647028
62.3799	5.6864	8.88998	11.7356	32.4516	0.6497
62.3799	5.68638	8.53	11.733	32.449	0.611244
62.3799	5.68637	8.47876	11.7328	32.4488	0.6059
62.3799	5.68635	8.11	11.731	32.447	0.625128
62.3799	5.68634	8.05998	11.7311	32.447	0.6278
62.3799	5.68632	7.7	11.732	32.447	0.634209
62.3799	5.68629	7.29	11.732	32.447	0.641509
62.3799	5.68629	7.23876	11.7319	32.447	0.6424
62.3799	5.68626	6.87	11.731	32.447	0.616762
62.3799	5.68626	6.8212	11.7309	32.4468	0.6132
62.3799	5.68624	6.47	11.73	32.445	0.619609
62.3799	5.68623	6.41876	11.7302	32.445	0.6205
62.3799	5.68621	6.05	11.732	32.445	0.614091
62.3799	5.6862	6.0012	11.732	32.4452	0.6132
62.3799	5.68618	5.65	11.732	32.447	0.6132
62.3799	5.68618	5.59998	11.732	32.4469	0.6132
62.3799	5.68615	5.24	11.732	32.446	0.6132
62.3799	5.68615	5.18876	11.732	32.4461	0.6132
62.3799	5.68612	4.82	11.732	32.447	0.568334
62.3799	5.68612	4.76876	11.7319	32.4469	0.5621
62.3799	5.6861	4.4	11.731	32.446	0.555691
62.3799	5.68609	4.35242	11.7308	32.4462	0.5548
62.3799	5.68607	4.01	11.729	32.448	0.545186
62.3799	5.68604	3.64	11.731	32.445	0.534236
62.3799	5.68604	3.5912	11.731	32.4452	0.5329
62.3799	5.68601	3.24	11.731	32.447	0.494444
62.3799	5.68601	3.18998	11.7303	32.4466	0.4891
62.3799	5.68598	2.83	11.725	32.444	0.476281
62.3799	5.68598	2.77998	11.725	32.4439	0.4745
62.3799	5.68596	2.42	11.725	32.443	0.455272
62.3799	5.68595	2.37852	11.7252	32.4431	0.4526
62.3799	5.68593	2.08	11.727	32.444	0.433372
62.3799	5.68593	2.03364	11.7274	32.444	0.4307
62.3799	5.68591	1.7	11.73	32.444	0.437109
62.3799	5.68591	1.6573	11.7293	32.444	0.438
62.3799	5.68589	1.35	11.724	32.444	0.405953
62.3799	5.68589	1.31096	11.7238	32.444	0.4015
62.3799	5.68587	1.03	11.722	32.444	0.407909
62.3799	5.68587	0.99828	11.7222	32.4439	0.4088
62.3799	5.68586	0.77	11.724	32.443	0.405595
62.3799	5.68585	0.55	11.724	32.443	0.401945
62.3799	5.68585	0.5195	11.7239	32.4431	0.4015
62.3799	5.68585	0.3	11.723	32.444	0.388681
62.3799	5.68584	0.28292	11.7231	32.4439	0.3869
62.3798	5.68584	0.16	11.724	32.443	0.406128
62.3798	5.68584	0.14292	11.7242	32.443	0.4088
62.3798	5.68583	0.02	11.726	32.443	0.428028
62.3798	5.68583	0.0261	11.7259	32.4431	0.4307
62.3798	5.68583	0.07	11.725	32.444	0.385834
62.3798	5.68583	0.06878	11.7249	32.4441	0.3796
62.3798	5.68582	0.06	11.724	32.445	0.3796
62.3798	5.68582	0.05756	11.7244	32.4449	0.3796
62.3799	5.68576	0.04	11.727	32.444	0.373191
62.3799	5.68576	0.0497796	11.7225	30.5147	0.3723
62.3799	5.68576	0.12	11.69	16.662	0.35951
62.3799	5.68576	0.117525	11.6941	18.1062	0.3577
62.3799	5.68575	0.1	11.723	28.332	0.376928
62.3799	5.68575	0.05	11.725	32.282	0.398828
62.3799	5.68575	0.04756	11.725	32.3016	0.4015
62.3799	5.68575	0.03	11.725	32.443	0.4015
62.3799	5.68575	0.03854	11.7249	30.8951	0.4015
62.3799	5.68575	0.1	11.724	19.755	0.4015
62.3799	5.68575	0.09146	11.7242	21.3016	0.4015
62.3799	5.68576	0.03	11.726	32.432	0.4015
62.3799	5.68576	0.03366	11.7258	32.4326	0.4015
62.3799	5.68575	0.06	11.724	32.437	0.414319
62.3799	5.68575	0.05756	11.7244	32.438	0.4161
62.3799	5.68575	0.04	11.727	32.445	0.454556
62.3799	5.68575	0.04244	11.7269	32.4407	0.4599
62.3799	5.68575	0.06	11.726	32.41	0.408625
62.3799	5.68575	0.06122	11.725	32.413	0.4015
62.3799	5.68575	0.07	11.718	32.435	0.439956
62.3799	5.68575	0.06756	11.7182	32.4357	0.4453
62.3799	5.68575	0.05	11.72	32.441	0.432481
62.3799	5.68575	0.02	11.723	32.444	0.417881
62.3799	5.68575	0.02244	11.7228	32.4439	0.4161
62.3799	5.68575	0.04	11.721	32.443	0.435328
62.3799	5.68575	0.0375576	11.721	32.4434	0.438
62.3799	5.68575	0.02	11.721	32.446	0.418794
62.3799	5.68575	0.0261562	11.716	29.5212	0.4161
62.3799	5.68575	0.07	11.68	8.691	0.435284
62.3799	5.68575	0.0638124	11.6854	10.8517	0.438
62.3799	5.68575	0.02	11.724	26.151	0.418772
62.3799	5.68575	0.0370971	11.7223	26.2392	0.4161
62.3799	5.68575	0.16	11.71	26.873	0.409698
62.3799	5.68575	0.156314	11.7116	27.5397	0.4088
62.3799	5.68576	0.13	11.723	32.299	0.415209
62.3799	5.68576	0.117788	11.7231	32.3151	0.4161
62.3799	5.68575	0.03	11.724	32.431	0.403296
62.3799	5.68575	0.03615	11.7228	31.2963	0.4015
62.3799	5.68575	0.08	11.714	23.206	0.4015
62.3799	5.68576	0.07	11.722	32.33	0.4015
62.3799	5.68576	0.07244	11.722	32.3368	0.4015
62.3799	5.68576	0.09	11.722	32.386	0.388681
62.3799	5.68576	0.09	11.722	32.393	0.3869
62.3799	5.68576	0.09	11.722	32.443	0.399719
62.3799	5.68576	0.0839	11.722	32.443	0.4015
62.3799	5.68576	0.04	11.722	32.443	0.407909
62.3799	5.68576	0.0473347	11.7136	32.2267	0.4088
62.3799	5.68577	0.1	11.653	30.674	0.415195
62.3799	5.68577	0.0987612	11.6614	27.9324	0.4161
62.3799	5.68577	0.09	11.721	8.542	0.4161
62.3799	5.68577	0.08877	11.7212	11.4797	0.4161
62.3799	5.68577	0.08	11.723	32.426	0.4161
62.3799	5.68577	0.07385	11.7226	32.3973	0.4161
62.3799	5.68577	0.03	11.72	32.193	0.377687
62.3799	5.68577	0.0336863	11.7201	32.222	0.3723
62.3799	5.68577	0.06	11.721	32.429	0.385119
62.3799	5.68577	0.05	11.719	32.444	0.399704
62.3799	5.68577	0.05	11.7196	32.444	0.4015
62.3799	5.68577	0.05	11.724	32.444	0.395098
62.3799	5.68577	0.0586186	11.71	31.0447	0.3942
62.3799	5.68578	0.12	11.61	21.079	0.375016
62.3799	5.68578	0.12	11.624	20.5437	0.3723
62.3799	5.68577	0.12	11.723	16.758	0.404311
62.3799	5.68577	0.11385	11.7231	18.6873	0.4088
62.3799	5.68577	0.07	11.724	32.443	0.383192
62.3799	5.68577	0.07369	11.724	32.4371	0.3796
62.3799	5.68576	0.1	11.724	32.395	0.360394
62.3799	5.68575	0.10492	11.724	32.3996	0.3577
62.3799	5.68574	0.14	11.724	32.432	0.3577
62.3799	5.68573	0.13385	11.7242	32.4336	0.3577
62.3799	5.68571	0.09	11.726	32.445	0.370504
62.3799	5.68571	0.09615	11.726	32.445	0.3723
62.3799	5.68569	0.14	11.726	32.445	0.369099
62.3799	5.68566	0.15	11.728	32.447	0.365449
62.3799	5.68566	0.15	11.728	32.4468	0.365
62.3799	5.68564	0.15	11.728	32.445	0.358598
62.3799	5.68564	0.15861	11.7276	32.445	0.3577
62.3799	5.68561	0.22	11.725	32.445	0.364102
62.3799	5.68561	0.22738	11.7251	32.4449	0.365
62.3799	5.6856	0.28	11.726	32.444	0.371402
62.3799	5.6856	0.30337	11.7256	32.4441	0.3723
62.3799	5.68558	0.47	11.723	32.445	0.359496
62.3799	5.68558	0.50813	11.7231	32.4448	0.3577
62.3799	5.68558	0.78	11.724	32.443	0.38971
62.3799	5.68558	0.83166	11.724	32.4431	0.3942
62.3799	5.68557	1.2	11.724	32.444	0.400602
62.3799	5.68557	1.24797	11.7242	32.444	0.4015
62.3799	5.68557	1.59	11.726	32.444	0.427108
62.3799	5.68558	1.64535	11.7261	32.444	0.4307
62.38	5.68558	2.04	11.727	32.444	0.4307
62.38	5.6856	2.51	11.725	32.443	0.4307
62.38	5.68561	2.57027	11.7252	32.4431	0.4307
62.38	5.68563	3	11.727	32.444	0.443504
62.38	5.68563	3.06027	11.7271	32.444	0.4453
62.38	5.68566	3.49	11.728	32.444	0.464506
62.38	5.68566	3.55642	11.7279	32.444	0.4672
62.38	5.68569	4.03	11.727	32.444	0.480004
62.38	5.68569	4.09642	11.727	32.4439	0.4818
62.38	5.68572	4.57	11.727	32.443	0.488202
62.38	5.68573	4.63765	11.7271	32.4432	0.4891
62.38	5.68575	5.12	11.728	32.445	0.540317
62.38	5.68575	5.18273	11.7279	32.4449	0.5475
62.38	5.68577	5.63	11.727	32.444	0.541098
62.38	5.68577	5.68781	11.727	32.444	0.5402
62.3801	5.68578	6.1	11.727	32.444	0.546602
62.3801	5.68578	6.15166	11.727	32.444	0.5475
62.3801	5.68579	6.52	11.727	32.444	0.566706
62.3801	5.68579	6.95	11.726	32.443	0.588606
62.3801	5.68579	7.00904	11.7261	32.4432	0.5913
62.3801	5.68579	7.43	11.727	32.445	0.572094
62.3801	5.68579	7.49642	11.7271	32.445	0.5694
62.3801	5.68578	7.97	11.728	32.445	0.575802
62.3801	5.68578	8.04134	11.7279	32.445	0.5767
62.3801	5.68578	8.55	11.727	32.445	0.570298
62.3801	5.68578	8.61765	11.727	32.4449	0.5694
62.3802	5.68577	9.1	11.727	32.444	0.588606
62.3802	5.68577	9.16526	11.7277	32.4441	0.5913
62.3802	5.68577	9.63	11.733	32.445	0.5913
62.3802	5.68577	9.69324	11.7337	32.446	0.5913
62.3802	5.68577	10.14	11.739	32.453	0.60409
62.3802	5.68577	10.2057	11.7399	32.4539	0.6059
62.3802	5.68577	10.67	11.746	32.46	0.631479
62.3802	5.68577	10.7394	11.7456	32.4599	0.6351
62.3802	5.68577	11.23	11.743	32.459	0.619095
62.3803	5.68577	11.77	11.742	32.457	0.600863
62.3803	5.68577	11.8332	11.7425	32.4572	0.5986
62.3803	5.68578	12.28	11.746	32.459	0.5986
62.3803	5.68578	12.3445	11.747	32.4601	0.5986
62.3803	5.68578	12.8	11.754	32.468	0.604995
62.3803	5.68578	12.862	11.754	32.4679	0.6059
62.3803	5.68578	13.3	11.754	32.467	0.599505
62.3803	5.68578	13.3595	11.7544	32.4672	0.5986
62.3803	5.68578	13.78	11.757	32.469	0.617784
62.3803	5.68578	13.8408	11.7574	32.4695	0.6205
62.3803	5.68578	14.27	11.76	32.473	0.614105
62.3803	5.68578	14.3319	11.7606	32.4742	0.6132
62.3804	5.68578	14.77	11.765	32.483	0.626004
62.3804	5.68578	14.8279	11.7651	32.4831	0.6278
62.3804	5.68578	15.24	11.766	32.484	0.64059
62.3804	5.68578	15.2995	11.7661	32.4842	0.6424
62.3804	5.68578	15.72	11.767	32.486	0.632797
62.3804	5.68578	16.2	11.767	32.488	0.621858
62.3804	5.68578	16.2582	11.7671	32.4886	0.6205
62.3804	5.68578	16.67	11.768	32.493	0.652511
62.3804	5.68578	16.7278	11.768	32.493	0.657
62.3804	5.68578	17.14	11.768	32.493	0.657
62.3804	5.68578	17.1978	11.7681	32.493	0.657
62.3805	5.68578	17.61	11.769	32.493	0.657
62.3805	5.68578	17.6654	11.7691	32.4932	0.657
62.3805	5.68578	18.06	11.77	32.495	0.650598
62.3805	5.68578	18.1166	11.7704	32.4954	0.6497
62.3805	5.68578	18.52	11.773	32.498	0.6497
62.3805	5.68578	18.5758	11.7731	32.4981	0.6497
62.3805	5.68578	18.97	11.774	32.499	0.668884
62.3805	5.68578	19.027	11.774	32.4988	0.6716
62.3805	5.68578	19.43	11.774	32.497	0.65881
62.3805	5.68578	19.4857	11.7744	32.4972	0.657
62.3805	5.68578	19.88	11.777	32.499	0.657
62.3806	5.68578	20.33	11.777	32.5	0.657
62.3806	5.68578	20.3833	11.7771	32.5004	0.657
62.3806	5.68578	20.76	11.778	32.503	0.657
62.3806	5.68578	20.8129	11.7781	32.5029	0.657
62.3806	5.68578	21.19	11.779	32.502	0.663395
62.3806	5.68578	21.2446	11.7792	32.5021	0.6643
62.3806	5.68578	21.63	11.781	32.503	0.67709
62.3806	5.68578	21.6833	11.7814	32.5031	0.6789
62.3806	5.68578	22.06	11.784	32.504	0.672505
62.3806	5.68578	22.1133	11.7845	32.5045	0.6716
62.3806	5.68578	22.49	11.788	32.508	0.684404
62.3806	5.68578	22.5429	11.7881	32.508	0.6862
62.3806	5.68578	22.92	11.789	32.508	0.692602
62.3806	5.68578	22.9729	11.7891	32.5081	0.6935
62.3807	5.68578	23.35	11.79	32.509	0.655087
62.3807	5.68578	23.4017	11.7901	32.5091	0.6497
62.3807	5.68578	23.77	11.791	32.51	0.662504
62.3807	5.68578	24.19	11.795	32.51	0.67709
62.3807	5.68578	24.2408	11.7959	32.5106	0.6789
62.3807	5.68578	24.6	11.802	32.515	0.69169
62.3807	5.68578	24.6508	11.8029	32.5155	0.6935
62.3807	5.68578	25.01	11.809	32.519	0.699902
62.3807	5.68578	25.0592	11.8096	32.5196	0.7008
62.3807	5.68578	25.41	11.814	32.524	0.71359
62.3807	5.68578	25.4608	11.8141	32.524	0.7154
62.3807	5.68578	25.82	11.815	32.524	0.709005
62.3807	5.68578	25.8683	11.8156	32.5242	0.7081
62.3808	5.68578	26.21	11.82	32.526	0.714502
62.3808	5.68578	26.2604	11.8202	32.5261	0.7154
62.3808	5.68578	26.62	11.822	32.527	0.689792
62.3808	5.68578	26.6692	11.8226	32.5274	0.6862
62.3808	5.68578	27.02	11.827	32.53	0.692595
62.3808	5.68578	27.0683	11.8274	32.5301	0.6935
62.3808	5.68578	27.41	11.83	32.531	0.696701
62.3808	5.68578	27.81	11.836	32.534	0.700351
62.3808	5.68578	27.8592	11.8367	32.5344	0.7008
62.3808	5.68578	28.21	11.842	32.537	0.707202
62.3808	5.68578	28.258	11.8445	32.5382	0.7081
62.3808	5.68578	28.6	11.862	32.547	0.727306
62.3808	5.68578	28.6492	11.8648	32.5487	0.73
62.3809	5.68578	29	11.885	32.561	0.755608
62.3809	5.68578	29.048	11.8904	32.5636	0.7592
62.3809	5.68578	29.39	11.929	32.582	0.733592
62.3809	5.68578	29.4392	11.9247	32.5853	0.73
62.3809	5.68578	29.79	11.894	32.609	0.749206
62.3809	5.68578	29.8404	11.8874	32.6099	0.7519
62.3809	5.68579	30.2	11.84	32.616	0.713487
62.3809	5.68579	30.248	11.8315	32.6219	0.7081
62.3809	5.68579	30.59	11.771	32.664	0.7081
62.3809	5.68579	30.6392	11.7642	32.6694	0.7081
62.3809	5.68579	30.99	11.716	32.708	0.711301
62.3809	5.68579	31.37	11.669	32.733	0.714951
62.381	5.68579	31.4192	11.6513	32.7417	0.7154
62.381	5.68579	31.77	11.525	32.804	0.664183
62.381	5.68579	31.818	11.515	32.8102	0.657
62.381	5.68579	32.16	11.444	32.854	0.586577
62.381	5.68579	32.2067	11.4363	32.8589	0.5767
62.381	5.68579	32.54	11.381	32.894	0.563896
62.381	5.68579	32.5867	11.3744	32.8976	0.5621
62.381	5.68579	32.92	11.327	32.923	0.549296
62.381	5.68579	32.9668	11.3232	32.9257	0.5475
62.381	5.68579	33.3	11.296	32.945	0.528316
62.381	5.68579	33.3459	11.2838	32.9488	0.5256
62.381	5.68579	33.67	11.198	32.976	0.500021
62.381	5.68579	33.7159	11.1854	32.9829	0.4964
62.381	5.68579	34.04	11.096	33.032	0.470821
62.381	5.68579	34.0871	11.095	33.0363	0.4672
62.3811	5.68579	34.42	11.088	33.067	0.464003
62.3811	5.68579	34.79	11.048	33.075	0.460353
62.3811	5.68579	34.8359	11.0207	33.0849	0.4599
62.3811	5.68579	35.16	10.828	33.155	0.453505
62.3811	5.68579	35.2059	10.8247	33.1643	0.4526
62.3811	5.68579	35.53	10.801	33.23	0.446205
62.3811	5.68579	35.5759	10.7995	33.231	0.4453
62.3811	5.68579	35.9	10.789	33.238	0.4453
62.3811	5.68579	35.9446	10.7874	33.2389	0.4453
62.3811	5.68579	36.26	10.776	33.245	0.451695
62.3811	5.68579	36.3046	10.7712	33.2459	0.4526
62.3811	5.68579	36.62	10.737	33.252	0.433416
62.3811	5.68579	36.6646	10.7306	33.257	0.4307
62.3812	5.68579	36.98	10.685	33.292	0.469113
62.3812	5.68579	37.0256	10.6834	33.2968	0.4745
62.3812	5.68579	37.35	10.672	33.331	0.468105
62.3812	5.68579	37.3946	10.6725	33.3338	0.4672
62.3812	5.68579	37.71	10.676	33.354	0.483205
62.3812	5.68579	38.06	10.573	33.464	0.501455
62.3812	5.68579	38.1043	10.5531	33.4746	0.5037
62.3812	5.68579	38.42	10.411	33.55	0.49091
62.3812	5.68579	38.4622	10.3853	33.5573	0.4891
62.3812	5.68579	38.76	10.204	33.609	0.469916
62.3812	5.68579	38.8022	10.1852	33.6189	0.4672
62.3812	5.68579	39.1	10.052	33.689	0.435226
62.3812	5.68579	39.1434	10.0323	33.692	0.4307
62.3812	5.68579	39.45	9.893	33.713	0.417896
62.3812	5.68579	39.4918	9.88144	33.7189	0.4161
62.3813	5.68579	39.79	9.799	33.761	0.403296
62.3813	5.68579	39.8319	9.79789	33.7622	0.4015
62.3813	5.68579	40.13	9.79	33.771	0.395105
62.3813	5.68579	40.1734	9.78988	33.7711	0.3942
62.3813	5.68579	40.48	9.789	33.772	0.3942
62.3813	5.68579	40.5234	9.78664	33.7721	0.3942
62.3813	5.68579	40.83	9.77	33.773	0.3942
62.3813	5.68579	41.17	9.738	33.782	0.3942
62.3813	5.68579	41.2134	9.7163	33.7845	0.3942
62.3813	5.68579	41.52	9.563	33.802	0.362226
62.3813	5.68579	41.5646	9.53897	33.8107	0.3577
62.3813	5.68579	41.88	9.369	33.872	0.338494
62.3813	5.68579	41.9231	9.35201	33.8762	0.3358
62.3814	5.68579	42.23	9.231	33.906	0.316616
62.3814	5.68579	42.2746	9.21959	33.9118	0.3139
62.3814	5.68579	42.59	9.139	33.953	0.307505
62.3814	5.68579	42.6334	9.13404	33.9552	0.3066
62.3814	5.68579	42.94	9.099	33.971	0.300205
62.3814	5.68579	42.9846	9.09317	33.9724	0.2993
62.3814	5.68579	43.3	9.052	33.982	0.2993
62.3814	5.68579	43.3446	9.04431	33.9841	0.2993
62.3814	5.68579	43.66	8.99	33.999	0.273721
62.3814	5.68579	43.7034	8.98553	34.0017	0.2701
62.3814	5.68579	44.01	8.954	34.021	0.273294
62.3814	5.68579	44.36	8.904	34.039	0.276947
62.3814	5.68579	44.4034	8.89966	34.0402	0.2774
62.3814	5.68579	44.71	8.869	34.049	0.258216
62.3814	5.68579	44.7522	8.86454	34.0502	0.2555
62.3815	5.68579	45.05	8.833	34.059	0.261895
62.3815	5.68579	45.0922	8.82816	34.061	0.2628
62.3815	5.68579	45.39	8.794	34.075	0.25001
62.3815	5.68579	45.4334	8.78135	34.0762	0.2482
62.3815	5.68579	45.74	8.692	34.085	0.229016
62.3815	5.68579	45.7834	8.66993	34.0962	0.2263
62.3815	5.68579	46.09	8.514	34.175	0.200721
62.3815	5.68579	46.1334	8.50098	34.1812	0.1971
62.3815	5.68579	46.44	8.409	34.225	0.190705
62.3815	5.68579	46.4834	8.39858	34.2303	0.1898
62.3815	5.68579	46.79	8.325	34.268	0.157826
62.3815	5.68579	46.8322	8.30144	34.2743	0.1533
62.3815	5.68579	47.13	8.135	34.319	0.1533
62.3815	5.68579	47.48	8.075	34.416	0.1533
62.3815	5.68579	47.5246	8.07438	34.4174	0.1533
62.3816	5.68579	47.84	8.07	34.427	0.146905
62.3816	5.68579	47.8822	8.06864	34.4272	0.146
62.3816	5.68579	48.18	8.059	34.429	0.139605
62.3816	5.68579	48.2222	8.05838	34.4292	0.1387
62.3816	5.68579	48.52	8.054	34.431	0.1387
62.3816	5.68579	48.5609	8.05177	34.4314	0.1387
62.3816	5.6858	48.85	8.036	34.434	0.12591
62.3816	5.6858	48.881	8.03476	34.4349	0.1241
62.3816	5.6858	49.1	8.026	34.441	0.11131
62.3816	5.6858	49.1223	8.02377	34.4414	0.1095
62.3816	5.6858	49.28	8.008	34.444	0.141474
62.3816	5.6858	49.2961	8.00738	34.4447	0.146
62.3816	5.6858	49.41	8.003	34.45	0.114026
62.3816	5.6858	49.4125	8.00213	34.4502	0.1095
62.3817	5.6858	49.43	7.996	34.452	0.115895
62.3817	5.6858	49.27	8.001	34.454	0.123195
62.3817	5.6858	49.2328	8.00187	34.4536	0.1241
62.3817	5.6858	48.97	8.008	34.451	0.130495
62.3817	5.6858	48.9241	8.01172	34.45	0.1314
62.3817	5.6858	48.6	8.038	34.443	0.150584
62.3817	5.6858	48.5479	8.03998	34.4419	0.1533
62.3817	5.6858	48.18	8.054	34.434	0.14051
62.3817	5.6858	48.1267	8.05524	34.4336	0.1387
62.3817	5.6858	47.75	8.064	34.431	0.1387
62.3817	5.6858	47.6979	8.06611	34.4303	0.1387
62.3817	5.6858	47.33	8.081	34.425	0.132305
62.3817	5.6858	47.2754	8.09092	34.422	0.1314
62.3818	5.6858	46.89	8.161	34.401	0.156979
62.3818	5.6858	46.8354	8.19237	34.3938	0.1606
62.3818	5.68579	46.45	8.414	34.343	0.17339
62.3818	5.68579	46.3967	8.43347	34.3246	0.1752
62.3818	5.68579	46.02	8.571	34.195	0.197582
62.3818	5.68579	45.58	8.761	34.149	0.223132
62.3818	5.68579	45.5254	8.76956	34.1391	0.2263
62.3818	5.6858	45.14	8.83	34.069	0.23909
62.3818	5.6858	45.0842	8.83521	34.0679	0.2409
62.3818	5.6858	44.69	8.872	34.06	0.247295
62.3818	5.6858	44.6354	8.87473	34.0588	0.2482
62.3818	5.6858	44.25	8.894	34.05	0.267384
62.3818	5.6858	44.1942	8.90132	34.0484	0.2701
62.3819	5.6858	43.8	8.953	34.037	0.2701
62.3819	5.6858	43.7454	8.95722	34.0344	0.2701
62.3819	5.6858	43.36	8.987	34.016	0.2701
62.3819	5.6858	43.3067	8.99407	34.014	0.2701
62.3819	5.6858	42.93	9.044	34	0.295679
62.3819	5.6858	42.8779	9.05789	33.9981	0.2993
62.3819	5.6858	42.51	9.156	33.985	0.31209
62.3819	5.6858	42.4592	9.17398	33.9784	0.3139
62.3819	5.6858	42.1	9.301	33.932	0.317097
62.3819	5.6858	41.69	9.49	33.908	0.320747
62.3819	5.6858	41.6404	9.521	33.8989	0.3212
62.3819	5.6858	41.29	9.74	33.835	0.359569
62.3819	5.6858	41.2379	9.74434	33.8272	0.365
62.382	5.6858	40.87	9.775	33.772	0.390579
62.382	5.6858	40.8192	9.77698	33.7721	0.3942
62.382	5.6858	40.46	9.791	33.773	0.387805
62.382	5.6858	40.4067	9.79187	33.7726	0.3869
62.382	5.6858	40.03	9.798	33.77	0.3869
62.382	5.6858	39.9779	9.7985	33.7698	0.3869
62.382	5.6858	39.61	9.802	33.768	0.393295
62.382	5.6858	39.5567	9.81688	33.7682	0.3942
62.382	5.6858	39.18	9.922	33.77	0.419779
62.382	5.6858	39.1267	9.96862	33.7609	0.4234
62.382	5.6858	38.75	10.298	33.697	0.455374
62.382	5.6858	38.6967	10.311	33.6834	0.4599
62.382	5.6858	38.32	10.403	33.587	0.469492
62.382	5.6858	37.89	10.482	33.568	0.480442
62.382	5.6858	37.8379	10.5103	33.5618	0.4818
62.3821	5.6858	37.47	10.71	33.518	0.513774
62.3821	5.6858	37.4179	10.7076	33.5	0.5183
62.3821	5.6858	37.05	10.691	33.373	0.486326
62.3821	5.6858	36.9992	10.6947	33.367	0.4818
62.3821	5.6858	36.64	10.721	33.325	0.4818
62.3821	5.6858	36.5892	10.7307	33.3173	0.4818
62.3821	5.6858	36.23	10.799	33.263	0.430642
62.3821	5.6858	36.1804	10.806	33.2569	0.4234
62.3821	5.6858	35.83	10.855	33.214	0.455337
62.3821	5.6858	35.7812	10.8614	33.2096	0.4599
62.3821	5.6858	35.44	10.906	33.179	0.453513
62.3821	5.6858	35.39	10.9115	33.1758	0.4526
62.3821	5.6858	35.04	10.95	33.153	0.439825
62.3821	5.6858	34.9888	10.956	33.1512	0.438
62.3822	5.6858	34.63	10.998	33.139	0.453969
62.3822	5.6858	34.24	11.233	33.078	0.472219
62.3822	5.6858	34.1888	11.2404	33.0634	0.4745
62.3822	5.6858	33.83	11.292	32.961	0.519264
62.3822	5.6858	33.7792	11.2952	32.958	0.5256
62.3822	5.68581	33.42	11.318	32.937	0.531995
62.3822	5.68581	33.3692	11.3315	32.9348	0.5329
62.3822	5.68581	33.01	11.427	32.919	0.558479
62.3822	5.68581	32.9591	11.4352	32.9123	0.5621
62.3822	5.68581	32.6	11.493	32.865	0.594037
62.3822	5.68581	32.5487	11.4966	32.863	0.5986
62.3822	5.68581	32.19	11.522	32.849	0.617763
62.3822	5.68581	32.1412	11.5363	32.8459	0.6205
62.3822	5.68581	31.8	11.636	32.824	0.665212
62.3823	5.68581	31.7488	11.6462	32.817	0.6716
62.3823	5.68581	31.39	11.718	32.768	0.697179
62.3823	5.68581	31.3404	11.721	32.7651	0.7008
62.3823	5.6858	30.99	11.742	32.745	0.707187
62.3823	5.6858	30.59	11.842	32.691	0.714495
62.3823	5.6858	30.5404	11.8527	32.6824	0.7154
62.3823	5.6858	30.19	11.928	32.622	0.696216
62.3823	5.6858	30.1416	11.9242	32.6159	0.6935
62.3823	5.6858	29.8	11.897	32.573	0.71905
62.3823	5.6858	29.75	11.8931	32.5704	0.7227
62.3823	5.6858	29.4	11.866	32.552	0.741862
62.3823	5.6858	29.3487	11.8645	32.5511	0.7446
62.3823	5.6858	28.99	11.854	32.545	0.738212
62.3823	5.6858	28.9413	11.8523	32.5444	0.7373
62.3824	5.6858	28.6	11.84	32.54	0.718116
62.3824	5.6858	28.5504	11.8386	32.5393	0.7154
62.3824	5.68581	28.2	11.829	32.534	0.709013
62.3824	5.68581	28.1487	11.829	32.5337	0.7081
62.3824	5.68581	27.79	11.829	32.532	0.727263
62.3824	5.68581	27.74	11.8281	32.5316	0.73
62.3824	5.68581	27.39	11.822	32.529	0.720408
62.3824	5.68581	26.98	11.816	32.525	0.709469
62.3824	5.68581	26.9288	11.8156	32.525	0.7081
62.3824	5.68581	26.57	11.813	32.525	0.720875
62.3824	5.68581	26.5212	11.8127	32.5245	0.7227
62.3824	5.68581	26.18	11.811	32.521	0.716312
62.3824	5.68581	26.13	11.8111	32.5213	0.7154
62.3825	5.68581	25.78	11.812	32.523	0.7154
62.3825	5.68581	25.7312	11.8119	32.5231	0.7154
62.3825	5.68581	25.39	11.811	32.524	0.68985
62.3825	5.68581	25.3388	11.8099	32.5237	0.6862
62.3825	5.68581	24.98	11.802	32.522	0.698975
62.3825	5.68581	24.9312	11.8015	32.5215	0.7008
62.3825	5.68581	24.59	11.798	32.518	0.7008
62.3825	5.68581	24.54	11.7978	32.5176	0.7008
62.3825	5.68581	24.19	11.796	32.515	0.713575
62.3825	5.68581	24.14	11.7959	32.5149	0.7154
62.3825	5.68581	23.79	11.795	32.514	0.724981
62.3825	5.68581	23.39	11.795	32.514	0.735931
62.3825	5.68581	23.3412	11.7945	32.514	0.7373
62.3825	5.68581	23	11.791	32.514	0.71175
62.3825	5.68581	22.9513	11.791	32.5139	0.7081
62.3826	5.68581	22.61	11.791	32.513	0.720875
62.3826	5.68581	22.56	11.7906	32.5127	0.7227
62.3826	5.68581	22.21	11.788	32.511	0.703538
62.3826	5.68581	22.16	11.7875	32.5108	0.7008
62.3826	5.68581	21.81	11.784	32.509	0.7008
62.3826	5.68581	21.76	11.784	32.5087	0.7008
62.3826	5.68581	21.41	11.784	32.507	0.713575
62.3826	5.68581	21.3612	11.7839	32.507	0.7154
62.3826	5.68581	21.02	11.783	32.507	0.702625
62.3826	5.68581	20.9713	11.7829	32.5067	0.7008
62.3826	5.68581	20.63	11.782	32.505	0.713575
62.3826	5.68581	20.58	11.7819	32.5048	0.7154
62.3826	5.68581	20.23	11.781	32.503	0.718594
62.3826	5.68581	19.84	11.782	32.5	0.722244
62.3827	5.68581	19.79	11.7821	32.5	0.7227
62.3827	5.68581	19.44	11.783	32.5	0.69715
62.3827	5.68581	19.39	11.7831	32.5	0.6935
62.3827	5.68581	19.04	11.784	32.5	0.661563
62.3827	5.68581	18.99	11.7841	32.5001	0.657
62.3827	5.68581	18.64	11.785	32.501	0.695325
62.3827	5.68581	18.59	11.7856	32.501	0.7008
62.3827	5.68581	18.24	11.79	32.501	0.694412
62.3827	5.68581	18.19	11.7904	32.5009	0.6935
62.3827	5.68581	17.84	11.793	32.5	0.674337
62.3827	5.68581	17.7913	11.7931	32.5	0.6716
62.3827	5.68581	17.45	11.794	32.5	0.690762
62.3827	5.68581	17.4013	11.794	32.4999	0.6935
62.3827	5.68581	17.06	11.794	32.499	0.674337
62.3827	5.68581	17.01	11.7939	32.4988	0.6716
62.3828	5.68581	16.66	11.793	32.497	0.658825
62.3828	5.68581	16.26	11.793	32.496	0.644225
62.3828	5.68581	16.2087	11.789	32.4948	0.6424
62.3828	5.68581	15.85	11.761	32.486	0.648787
62.3828	5.68581	15.7988	11.7592	32.4832	0.6497
62.3828	5.68581	15.44	11.747	32.464	0.668862
62.3828	5.68581	15.3875	11.7481	32.4648	0.6716
62.3828	5.68581	15.02	11.756	32.47	0.639663
62.3828	5.68581	14.9688	11.7568	32.4699	0.6351
62.3828	5.68581	14.61	11.762	32.469	0.641488
62.3828	5.68581	14.5587	11.763	32.4695	0.6424
62.3828	5.68581	14.2	11.77	32.473	0.661563
62.3828	5.68581	14.1487	11.7709	32.4742	0.6643
62.3828	5.68581	13.79	11.777	32.483	0.63875
62.3828	5.68581	13.7363	11.778	32.4831	0.6351
62.3829	5.68581	13.36	11.785	32.484	0.647875
62.3829	5.68581	13.3087	11.7848	32.4844	0.6497
62.3829	5.68581	12.95	11.783	32.487	0.640119
62.3829	5.68581	12.53	11.791	32.489	0.629169
62.3829	5.68581	12.4787	11.791	32.4898	0.6278
62.3829	5.68581	12.12	11.791	32.495	0.634188
62.3829	5.68581	12.0687	11.7912	32.4949	0.6351
62.3829	5.68581	11.71	11.793	32.494	0.647875
62.3829	5.68581	11.6587	11.7931	32.4944	0.6497
62.3829	5.68581	11.3	11.794	32.497	0.636925
62.3829	5.68581	11.2487	11.7941	32.497	0.6351
62.3829	5.68581	10.89	11.795	32.497	0.6351
62.3829	5.68581	10.8413	11.7945	32.4969	0.6351
62.383	5.68581	10.5	11.791	32.496	0.654263
62.383	5.68581	10.4512	11.7882	32.4943	0.657
62.383	5.68581	10.11	11.769	32.482	0.63145
62.383	5.68581	10.0612	11.7679	32.4811	0.6278
62.383	5.68581	9.72	11.76	32.475	0.6278
62.383	5.68581	9.67125	11.7576	32.4725	0.6278
62.383	5.68582	9.33	11.741	32.455	0.630994
62.383	5.68582	8.92	11.741	32.456	0.634644
62.383	5.68582	8.86875	11.7398	32.4547	0.6351
62.383	5.68582	8.51	11.731	32.446	0.60955
62.383	5.68582	8.45875	11.7309	32.4459	0.6059
62.383	5.68582	8.1	11.73	32.445	0.593125
62.383	5.68582	8.05	11.7304	32.445	0.5913
62.383	5.68582	7.7	11.733	32.445	0.604075
62.383	5.68582	7.65125	11.733	32.4451	0.6059
62.3831	5.68582	7.31	11.733	32.446	0.612288
62.3831	5.68582	7.26125	11.7329	32.4461	0.6132
62.3831	5.68582	6.92	11.732	32.447	0.600425
62.3831	5.68582	6.86875	11.732	32.447	0.5986
62.3831	5.68582	6.51	11.732	32.447	0.604987
62.3831	5.68582	6.46125	11.732	32.4469	0.6059
62.3831	5.68582	6.12	11.732	32.446	0.593125
62.3831	5.68582	6.07125	11.7317	32.446	0.5913
62.3831	5.68582	5.73	11.73	32.446	0.600881
62.3831	5.68582	5.32	11.731	32.446	0.611831
62.3831	5.68582	5.26875	11.7311	32.4462	0.6132
62.3831	5.68582	4.91	11.732	32.448	0.632363
62.3831	5.68582	4.8575	11.7319	32.4479	0.6351
62.3831	5.68582	4.49	11.731	32.447	0.615938
62.3831	5.68582	4.44	11.731	32.447	0.6132
62.3832	5.68582	4.09	11.731	32.447	0.600425
62.3832	5.68582	4.0425	11.7309	32.4471	0.5986
62.3832	5.68582	3.71	11.73	32.448	0.604987
62.3832	5.68582	3.66	11.7302	32.448	0.6059
62.3832	5.68582	3.31	11.732	32.448	0.6059
62.3832	5.68582	3.25875	11.732	32.4481	0.6059
62.3832	5.68582	2.9	11.732	32.449	0.599512
62.3832	5.68582	2.85	11.7316	32.4487	0.5986
62.3832	5.68582	2.5	11.729	32.447	0.585825
62.3832	5.68582	2.45125	11.7293	32.4471	0.584
62.3832	5.68582	2.11	11.731	32.448	0.584
62.3832	5.68582	1.68	11.731	32.446	0.584
62.3832	5.68582	1.63	11.731	32.446	0.584
62.3833	5.68582	1.28	11.731	32.446	0.564837
62.3833	5.68582	1.24125	11.7309	32.4459	0.5621
62.3833	5.68582	0.97	11.73	32.445	0.53655
62.3833	5.68582	0.93875	11.7299	32.4453	0.5329
62.3833	5.68582	0.72	11.729	32.447	0.526513
62.3833	5.68582	0.69375	11.7286	32.4468	0.5256
62.3833	5.68582	0.51	11.726	32.445	0.50005
62.3833	5.68582	0.4875	11.7263	32.4453	0.4964
62.3833	5.68582	0.33	11.728	32.447	0.528337
62.3833	5.68582	0.3225	11.7281	32.4469	0.5329
62.3833	5.68582	0.27	11.729	32.446	0.494575
62.3833	5.68582	0.27375	11.7287	32.4462	0.4891
62.3833	5.68582	0.3	11.727	32.448	0.495488
62.3833	5.68582	0.3225	11.7272	32.4481	0.4964
62.3833	5.68582	0.48	11.729	32.449	0.515562
62.3833	5.68582	0.62	11.727	32.446	0.537462
62.3834	5.68582	0.65	11.727	32.4462	0.5402
62.3834	5.68582	0.86	11.727	32.448	0.527425
62.3834	5.68582	0.895	11.7274	32.448	0.5256
62.3834	5.68582	1.14	11.73	32.448	0.55115
62.3834	5.68582	1.1725	11.73	32.4477	0.5548
62.3834	5.68582	1.4	11.73	32.446	0.561187
62.3834	5.68582	1.43	11.7301	32.4461	0.5621
62.3834	5.68582	1.64	11.731	32.447	0.58765
62.3834	5.68582	1.67368	11.7312	32.4472	0.5913
62.3834	5.68582	1.91	11.733	32.449	0.5913
62.3834	5.68582	1.94328	11.733	32.449	0.5913
62.3834	5.68582	2.18	11.733	32.449	0.610463
62.3834	5.68582	2.21625	11.7327	32.449	0.6132
62.3834	5.68582	2.47	11.731	32.449	0.581262
62.3834	5.68582	2.50875	11.731	32.4487	0.5767
62.3834	5.68582	2.78	11.731	32.447	0.599056
62.3835	5.68582	3.09	11.734	32.449	0.624606
62.3835	5.68582	3.125	11.7342	32.4491	0.6278
62.3835	5.68582	3.37	11.736	32.45	0.6278
62.3835	5.68582	3.4025	11.736	32.4502	0.6278
62.3835	5.68583	3.63	11.736	32.452	0.634188
62.3835	5.68583	3.665	11.7356	32.4521	0.6351
62.3835	5.68583	3.91	11.733	32.453	0.622325
62.3835	5.68583	3.94875	11.7331	32.4528	0.6205
62.3835	5.68582	4.22	11.734	32.451	0.626887
62.3835	5.68583	4.25875	11.7344	32.4513	0.6278
62.3835	5.68583	4.53	11.737	32.453	0.640575
62.3835	5.68583	4.56875	11.737	32.4531	0.6424
62.3835	5.68583	4.84	11.737	32.454	0.636013
62.3835	5.68583	4.87754	11.7367	32.4539	0.6351
62.3835	5.68583	5.14	11.735	32.453	0.62872
62.3835	5.68583	5.17654	11.7349	32.4526	0.6278
62.3836	5.68583	5.43	11.734	32.45	0.62461
62.3836	5.68583	5.73	11.733	32.45	0.620956
62.3836	5.68583	5.77125	11.733	32.4496	0.6205
62.3836	5.68583	6.06	11.733	32.447	0.601337
62.3836	5.68583	6.09879	11.7331	32.4474	0.5986
62.3836	5.68583	6.37	11.734	32.45	0.61136
62.3836	5.68583	6.40906	11.7345	32.4509	0.6132
62.3836	5.68583	6.68	11.738	32.457	0.657861
62.3836	5.68583	6.72028	11.7371	32.4559	0.6643
62.3836	5.68583	7	11.731	32.448	0.625975
62.3836	5.68583	7.04125	11.731	32.4479	0.6205
62.3836	5.68583	7.33	11.731	32.447	0.6205
62.3836	5.68583	7.37	11.7311	32.4466	0.6205
62.3836	5.68583	7.65	11.732	32.444	0.626887
62.3836	5.68583	7.68875	11.7321	32.4445	0.6278
62.3836	5.68583	7.96	11.733	32.448	0.6278
62.3837	5.68583	7.99879	11.733	32.4481	0.6278
62.3837	5.68583	8.27	11.733	32.449	0.61823
62.3837	5.68583	8.59	11.733	32.448	0.60728
62.3837	5.68583	8.63032	11.7331	32.448	0.6059
62.3837	5.68583	8.91	11.734	32.448	0.631421
62.3837	5.68583	8.95032	11.7343	32.4485	0.6351
62.3837	5.68583	9.23	11.736	32.452	0.62872
62.3837	5.68583	9.27032	11.7357	32.4519	0.6278
62.3837	5.68583	9.55	11.734	32.451	0.6278
62.3837	5.68583	9.59032	11.7343	32.4507	0.6278
62.3837	5.68583	9.87	11.736	32.449	0.61504
62.3837	5.68583	9.91032	11.7357	32.4493	0.6132
62.3837	5.68583	10.19	11.734	32.451	0.61958
62.3837	5.68583	10.2316	11.734	32.4511	0.6205
62.3837	5.68583	10.52	11.734	32.452	0.63326
62.3838	5.68583	10.5628	11.7339	32.4515	0.6351
62.3838	5.68583	10.86	11.733	32.448	0.615959
62.3838	5.68583	10.9028	11.7333	32.4484	0.6132
62.3838	5.68583	11.2	11.735	32.451	0.61639
62.3838	5.68583	11.54	11.736	32.452	0.62004
62.3838	5.68583	11.5816	11.7359	32.4517	0.6205
62.3838	5.68583	11.87	11.735	32.45	0.6205
62.3838	5.68583	11.9116	11.7354	32.4503	0.6205
62.3838	5.68583	12.2	11.738	32.452	0.60774
62.3838	5.68583	12.2403	11.7379	32.452	0.6059
62.3838	5.68583	12.52	11.737	32.452	0.61866
62.3838	5.68583	12.5616	11.7376	32.4526	0.6205
62.3838	5.68583	12.85	11.742	32.457	0.62688
62.3838	5.68583	12.8903	11.7423	32.4573	0.6278
62.3838	5.68583	13.17	11.744	32.459	0.62142
62.3839	5.68583	13.2141	11.7437	32.4587	0.6205
62.3839	5.68583	13.52	11.742	32.457	0.639641
62.3839	5.68583	13.5628	11.7433	32.4578	0.6424
62.3839	5.68583	13.86	11.752	32.463	0.63602
62.3839	5.68583	13.9016	11.7519	32.4635	0.6351
62.3839	5.68583	14.19	11.751	32.467	0.62872
62.3839	5.68583	14.51	11.751	32.463	0.62142
62.3839	5.68583	14.5491	11.7521	32.4636	0.6205
62.3839	5.68583	14.82	11.76	32.468	0.646021
62.3839	5.68583	14.8578	11.7601	32.4685	0.6497
62.3839	5.68583	15.12	11.761	32.472	0.6497
62.3839	5.68583	15.1603	11.7623	32.4728	0.6497
62.3839	5.68583	15.44	11.771	32.478	0.687981
62.3839	5.68583	15.4803	11.7739	32.4805	0.6935
62.384	5.68583	15.76	11.794	32.498	0.655219
62.384	5.68583	15.8028	11.7936	32.4985	0.6497
62.384	5.68583	16.1	11.791	32.502	0.66246
62.384	5.68583	16.1416	11.7886	32.5	0.6643
62.384	5.68583	16.43	11.772	32.486	0.67068
62.384	5.68583	16.4703	11.7753	32.488	0.6716
62.384	5.68583	16.75	11.798	32.502	0.6716
62.384	5.68583	16.7878	11.7998	32.5034	0.6716
62.384	5.68583	17.05	11.812	32.513	0.6716
62.384	5.68583	17.38	11.816	32.518	0.6716
62.384	5.68583	17.4228	11.8164	32.5183	0.6716
62.384	5.68583	17.72	11.819	32.52	0.68436
62.384	5.68583	17.7603	11.8189	32.5199	0.6862
62.384	5.68583	18.04	11.818	32.519	0.660679
62.384	5.68583	18.0828	11.818	32.5193	0.657
62.3841	5.68583	18.38	11.818	32.521	0.66338
62.3841	5.68583	18.4241	11.8181	32.521	0.6643
62.3841	5.68583	18.73	11.819	32.521	0.683441
62.3841	5.68583	18.7716	11.8189	32.521	0.6862
62.3841	5.68583	19.06	11.818	32.521	0.6862
62.3841	5.68583	19.1028	11.8181	32.5214	0.6862
62.3841	5.68583	19.4	11.819	32.524	0.69258
62.3841	5.68583	19.4415	11.819	32.524	0.6935
62.3841	5.68583	19.73	11.819	32.524	0.680725
62.3841	5.68583	19.7725	11.8188	32.5241	0.6789
62.3841	5.68583	20.07	11.817	32.525	0.675703
62.3841	5.68583	20.41	11.811	32.525	0.672053
62.3841	5.68583	20.4534	11.81	32.5248	0.6716
62.3841	5.68583	20.76	11.803	32.523	0.68439
62.3841	5.68583	20.8022	11.8025	32.523	0.6862
62.3842	5.68583	21.1	11.799	32.523	0.692595
62.3842	5.68583	21.1422	11.7989	32.523	0.6935
62.3842	5.68583	21.44	11.798	32.523	0.70626
62.3842	5.68583	21.4828	11.7981	32.5231	0.7081
62.3842	5.68584	21.78	11.799	32.524	0.71448
62.3842	5.68584	21.8228	11.7991	32.5241	0.7154
62.3842	5.68584	22.12	11.8	32.525	0.72178
62.3842	5.68584	22.1628	11.8003	32.5251	0.7227
62.3842	5.68584	22.46	11.802	32.526	0.70994
62.3842	5.68584	22.5041	11.802	32.5264	0.7081
62.3842	5.68584	22.81	11.802	32.529	0.71448
62.3842	5.68584	22.8528	11.8025	32.5294	0.7154
62.3842	5.68584	23.15	11.806	32.532	0.71859
62.3843	5.68584	23.49	11.808	32.538	0.72224
62.3843	5.68584	23.5328	11.8084	32.5384	0.7227
62.3843	5.68583	23.83	11.811	32.541	0.72908
62.3843	5.68583	23.8741	11.8115	32.5414	0.73
62.3843	5.68583	24.18	11.815	32.544	0.698099
62.3843	5.68583	24.2241	11.8153	32.5443	0.6935
62.3843	5.68583	24.53	11.817	32.546	0.731781
62.3843	5.68583	24.5728	11.8174	32.546	0.7373
62.3843	5.68583	24.87	11.82	32.546	0.718159
62.3843	5.68583	24.9141	11.8201	32.5463	0.7154
62.3843	5.68583	25.22	11.821	32.548	0.689879
62.3843	5.68583	25.2641	11.8213	32.5484	0.6862
62.3843	5.68583	25.57	11.823	32.551	0.724481
62.3843	5.68583	25.6128	11.823	32.5511	0.73
62.3843	5.68583	25.91	11.823	32.552	0.710859
62.3843	5.68583	25.9541	11.8231	32.5526	0.7081
62.3844	5.68583	26.26	11.824	32.557	0.71448
62.3844	5.68583	26.61	11.825	32.559	0.72178
62.3844	5.68583	26.6516	11.825	32.559	0.7227
62.3844	5.68583	26.94	11.825	32.559	0.70994
62.3844	5.68583	26.9841	11.8251	32.5591	0.7081
62.3844	5.68583	27.29	11.826	32.56	0.7081
62.3844	5.68583	27.3316	11.8261	32.56	0.7081
62.3844	5.68583	27.62	11.827	32.56	0.71448
62.3844	5.68583	27.6616	11.8271	32.5599	0.7154
62.3844	5.68583	27.95	11.828	32.559	0.70264
62.3844	5.68583	27.9928	11.828	32.5595	0.7008
62.3844	5.68583	28.29	11.828	32.563	0.68804
62.3844	5.68583	28.3328	11.8279	32.5631	0.6862
62.3844	5.68583	28.63	11.827	32.564	0.67982
62.3844	5.68583	28.6716	11.8271	32.5646	0.6789
62.3845	5.68583	28.96	11.828	32.569	0.68528
62.3845	5.68583	29.0016	11.8294	32.5701	0.6862
62.3845	5.68583	29.29	11.839	32.578	0.67982
62.3845	5.68583	29.62	11.846	32.586	0.67252
62.3845	5.68583	29.6616	11.8476	32.587	0.6716
62.3845	5.68583	29.95	11.859	32.594	0.67798
62.3845	5.68583	29.9928	11.8596	32.5946	0.6789
62.3845	5.68583	30.29	11.864	32.599	0.69166
62.3845	5.68583	30.3328	11.8634	32.6016	0.6935
62.3845	5.68583	30.63	11.859	32.62	0.69988
62.3845	5.68583	30.6741	11.8608	32.6279	0.7008
62.3845	5.68584	30.98	11.873	32.683	0.668899
62.3845	5.68584	31.0241	11.8641	32.6889	0.6643
62.3846	5.68584	31.33	11.802	32.73	0.6643
62.3846	5.68584	31.3728	11.7914	32.7335	0.6643
62.3846	5.68584	31.67	11.718	32.758	0.619639
62.3846	5.68584	31.7154	11.7015	32.7628	0.6132
62.3846	5.68584	32.03	11.587	32.796	0.594059
62.3846	5.68584	32.0716	11.5767	32.802	0.5913
62.3846	5.68584	32.36	11.505	32.844	0.59449
62.3846	5.68584	32.7	11.472	32.871	0.59814
62.3846	5.68584	32.7428	11.4662	32.8736	0.5986
62.3846	5.68584	33.04	11.426	32.892	0.573079
62.3846	5.68584	33.0803	11.4076	32.8964	0.5694
62.3846	5.68584	33.36	11.28	32.927	0.543879
62.3846	5.68584	33.4016	11.2656	32.9361	0.5402
62.3846	5.68584	33.69	11.166	32.999	0.521059
62.3846	5.68584	33.7303	11.1592	33.0057	0.5183
62.3847	5.68584	34.01	11.112	33.052	0.50554
62.3847	5.68584	34.0528	11.1075	33.054	0.5037
62.3847	5.68584	34.35	11.076	33.068	0.484559
62.3847	5.68584	34.3929	11.0739	33.07	0.4818
62.3847	5.68584	34.69	11.059	33.084	0.488173
62.3847	5.68584	34.7319	11.0562	33.0867	0.4891
62.3847	5.68584	35.02	11.037	33.105	0.47953
62.3847	5.68584	35.37	10.98	33.113	0.46858
62.3847	5.68584	35.4141	10.9685	33.1182	0.4672
62.3847	5.68584	35.72	10.889	33.154	0.46082
62.3847	5.68584	35.7629	10.8799	33.1646	0.4599
62.3847	5.68584	36.06	10.817	33.238	0.498137
62.3847	5.68584	36.1031	10.8096	33.2408	0.5037
62.3848	5.68584	36.4	10.759	33.26	0.478179
62.3848	5.68584	36.4428	10.7598	33.2652	0.4745
62.3848	5.68584	36.74	10.765	33.301	0.493641
62.3848	5.68584	36.7829	10.7644	33.3039	0.4964
62.3848	5.68584	37.08	10.76	33.324	0.490027
62.3848	5.68584	37.1219	10.7646	33.3286	0.4891
62.3848	5.68584	37.41	10.796	33.36	0.527381
62.3848	5.68584	37.4516	10.791	33.3647	0.5329
62.3848	5.68584	37.74	10.756	33.397	0.513759
62.3848	5.68584	37.7803	10.7443	33.4029	0.511
62.3848	5.68584	38.06	10.663	33.444	0.50143
62.3848	5.68584	38.4	10.487	33.511	0.49048
62.3848	5.68584	38.4416	10.4784	33.5173	0.4891
62.3848	5.68584	38.73	10.419	33.561	0.47634
62.3848	5.68584	38.7704	10.4108	33.5636	0.4745
62.3849	5.68584	39.05	10.354	33.582	0.461754
62.3849	5.68584	39.0931	10.3403	33.585	0.4599
62.3849	5.68584	39.39	10.246	33.606	0.427999
62.3849	5.68584	39.4303	10.2092	33.6118	0.4234
62.3849	5.68584	39.71	9.954	33.652	0.41702
62.3849	5.68584	39.7529	9.94076	33.663	0.4161
62.3849	5.68584	40.05	9.849	33.739	0.403354
62.3849	5.68584	40.0893	9.82071	33.7461	0.4015
62.3849	5.68584	40.36	9.626	33.795	0.369599
62.3849	5.68584	40.4028	9.61642	33.7992	0.365
62.3849	5.68584	40.7	9.55	33.828	0.37138
62.3849	5.68584	40.7404	9.54937	33.8303	0.3723
62.3849	5.68584	41.02	9.545	33.846	0.3723
62.3849	5.68584	41.35	9.445	33.847	0.3723
62.3849	5.68584	41.3931	9.43472	33.8521	0.3723
62.385	5.68584	41.69	9.364	33.887	0.346779
62.385	5.68584	41.7316	9.36287	33.8886	0.3431
62.385	5.68584	42.02	9.355	33.9	0.3431
62.385	5.68584	42.0628	9.35084	33.9	0.3431
62.385	5.68584	42.36	9.322	33.9	0.317579
62.385	5.68584	42.4029	9.31052	33.9029	0.3139
62.385	5.68585	42.7	9.231	33.923	0.307527
62.385	5.68585	42.7432	9.22744	33.9252	0.3066
62.385	5.68585	43.04	9.203	33.94	0.319346
62.385	5.68585	43.0705	9.1969	33.942	0.3212
62.385	5.68585	43.28	9.155	33.956	0.314827
62.385	5.68585	43.2838	9.15602	33.957	0.3139
62.385	5.68585	43.31	9.163	33.964	0.326646
62.385	5.68585	43.2871	9.1691	33.9631	0.3285
62.385	5.68585	43.13	9.211	33.957	0.315754
62.3851	5.68585	43.0919	9.21392	33.9545	0.3139
62.3851	5.68585	42.83	9.234	33.937	0.317086
62.3851	5.68585	42.46	9.25	33.934	0.320736
62.3851	5.68585	42.4093	9.26421	33.9317	0.3212
62.3851	5.68585	42.06	9.362	33.916	0.32758
62.3851	5.68585	42.0058	9.36376	33.9135	0.3285
62.3851	5.68585	41.63	9.376	33.896	0.33488
62.3851	5.68585	41.5771	9.38873	33.8951	0.3358
62.3851	5.68585	41.21	9.477	33.889	0.354941
62.3851	5.68585	41.1545	9.48406	33.8845	0.3577
62.3851	5.68584	40.77	9.533	33.853	0.3577
62.3851	5.68584	40.7154	9.54214	33.852	0.3577
62.3851	5.68584	40.34	9.605	33.845	0.383192
62.3852	5.68584	40.2842	9.64014	33.8416	0.3869
62.3852	5.68584	39.9	9.882	33.818	0.418801
62.3852	5.68584	39.8458	9.93409	33.8034	0.4234
62.3852	5.68584	39.47	10.295	33.702	0.448892
62.3852	5.68584	39.4154	10.3184	33.6869	0.4526
62.3852	5.68584	39.04	10.479	33.583	0.468532
62.3852	5.68584	38.6	10.665	33.509	0.486782
62.3852	5.68584	38.5454	10.6739	33.5019	0.4891
62.3852	5.68584	38.17	10.735	33.453	0.50186
62.3852	5.68584	38.1132	10.7417	33.442	0.5037
62.3852	5.68584	37.72	10.788	33.366	0.5037
62.3852	5.68584	37.6641	10.788	33.361	0.5037
62.3852	5.68584	37.28	10.788	33.327	0.478208
62.3852	5.68584	37.2241	10.7899	33.3238	0.4745
62.3853	5.68584	36.84	10.803	33.302	0.480873
62.3853	5.68584	36.7829	10.8017	33.3006	0.4818
62.3853	5.68585	36.39	10.793	33.291	0.4818
62.3853	5.68585	36.3341	10.7927	33.2893	0.4818
62.3853	5.68585	35.95	10.791	33.278	0.469054
62.3853	5.68585	35.8954	10.7967	33.2743	0.4672
62.3853	5.68585	35.52	10.836	33.249	0.460827
62.3853	5.68585	35.09	10.948	33.203	0.453527
62.3853	5.68585	35.0354	10.9517	33.1954	0.4526
62.3853	5.68585	34.66	10.977	33.143	0.478092
62.3853	5.68585	34.6054	10.9827	33.1402	0.4818
62.3853	5.68585	34.23	11.022	33.121	0.462681
62.3853	5.68585	34.1767	11.0267	33.1185	0.4599
62.3854	5.68585	33.81	11.059	33.101	0.479019
62.3854	5.68585	33.7579	11.0637	33.0987	0.4818
62.3854	5.68585	33.4	11.096	33.083	0.494546
62.3854	5.68585	33.3479	11.1072	33.0793	0.4964
62.3854	5.68585	32.99	11.184	33.054	0.502773
62.3854	5.68585	32.9367	11.2052	33.0442	0.5037
62.3854	5.68585	32.57	11.351	32.977	0.529192
62.3854	5.68585	32.5205	11.369	32.9687	0.5329
62.3854	5.68585	32.18	11.493	32.912	0.583883
62.3854	5.68585	32.1292	11.4985	32.9078	0.5913
62.3854	5.68585	31.78	11.536	32.879	0.594486
62.3854	5.68585	31.38	11.59	32.838	0.598136
62.3854	5.68585	31.3305	11.6063	32.8347	0.5986
62.3855	5.68585	30.99	11.718	32.812	0.624092
62.3855	5.68585	30.9379	11.7372	32.8017	0.6278
62.3855	5.68585	30.58	11.869	32.731	0.640546
62.3855	5.68585	30.5292	11.8743	32.7186	0.6424
62.3855	5.68585	30.18	11.911	32.633	0.680637
62.3855	5.68585	30.1292	11.9081	32.6303	0.6862
62.3855	5.68585	29.78	11.888	32.612	0.6862
62.3855	5.68585	29.7292	11.8828	32.6091	0.6862
62.3855	5.68585	29.38	11.847	32.589	0.692573
62.3855	5.68585	29.3292	11.8462	32.588	0.6935
62.3855	5.68585	28.98	11.841	32.581	0.680754
62.3855	5.68585	28.928	11.8411	32.5806	0.6789
62.3855	5.68585	28.57	11.842	32.578	0.66614
62.3855	5.68585	28.5183	11.8421	32.5774	0.6643
62.3856	5.68585	28.16	11.843	32.573	0.677046
62.3856	5.68585	27.75	11.844	32.571	0.691646
62.3856	5.68585	27.6993	11.8443	32.5709	0.6935
62.3856	5.68585	27.35	11.846	32.57	0.6935
62.3856	5.68585	27.2996	11.846	32.5699	0.6935
62.3856	5.68585	26.95	11.846	32.569	0.70626
62.3856	5.68585	26.8983	11.846	32.569	0.7081
62.3856	5.68585	26.54	11.846	32.569	0.7081
62.3856	5.68585	26.4895	11.8454	32.5686	0.7081
62.3856	5.68585	26.14	11.841	32.566	0.7081
62.3856	5.68585	26.0892	11.8409	32.5659	0.7081
62.3856	5.68585	25.74	11.84	32.565	0.695354
62.3856	5.68585	25.6892	11.8399	32.5645	0.6935
62.3856	5.68585	25.34	11.839	32.561	0.680754
62.3856	5.68585	25.2879	11.839	32.5606	0.6789
62.3857	5.68585	24.93	11.839	32.558	0.666154
62.3857	5.68585	24.8792	11.839	32.558	0.6643
62.3857	5.68585	24.53	11.839	32.558	0.661114
62.3857	5.68585	24.13	11.839	32.558	0.657464
62.3857	5.68585	24.0792	11.838	32.5575	0.657
62.3857	5.68585	23.73	11.831	32.554	0.676119
62.3857	5.68585	23.6792	11.8307	32.5536	0.6789
62.3857	5.68585	23.33	11.829	32.551	0.672527
62.3857	5.68585	23.278	11.8287	32.5507	0.6716
62.3857	5.68585	22.92	11.827	32.549	0.65884
62.3857	5.68585	22.8695	11.8269	32.5486	0.657
62.3857	5.68585	22.52	11.826	32.546	0.663373
62.3857	5.68585	22.4679	11.8259	32.5454	0.6643
62.3857	5.68585	22.11	11.825	32.541	0.651554
62.3857	5.68585	22.0579	11.825	32.5411	0.6497
62.3858	5.68585	21.7	11.825	32.542	0.656073
62.3858	5.68585	21.6492	11.8247	32.5419	0.657
62.3858	5.68585	21.3	11.823	32.541	0.657
62.3858	5.68585	21.248	11.8229	32.5406	0.657
62.3858	5.68585	20.89	11.822	32.538	0.66019
62.3858	5.68585	20.49	11.819	32.537	0.66384
62.3858	5.68585	20.4383	11.8186	32.5365	0.6643
62.3858	5.68585	20.08	11.816	32.533	0.638808
62.3858	5.68585	20.0293	11.8157	32.5325	0.6351
62.3858	5.68585	19.68	11.814	32.529	0.64786
62.3858	5.68585	19.6283	11.8122	32.527	0.6497
62.3858	5.68585	19.27	11.8	32.513	0.64332
62.3858	5.68585	19.2208	11.799	32.5114	0.6424
62.3859	5.68585	18.88	11.792	32.5	0.616908
62.3859	5.68585	18.8292	11.7916	32.4991	0.6132
62.3859	5.68585	18.48	11.789	32.493	0.619573
62.3859	5.68585	18.4292	11.7884	32.4926	0.6205
62.3859	5.68585	18.08	11.784	32.49	0.639619
62.3859	5.68585	18.0292	11.783	32.489	0.6424
62.3859	5.68586	17.68	11.776	32.482	0.636027
62.3859	5.68586	17.6279	11.7737	32.4806	0.6351
62.3859	5.68586	17.27	11.758	32.471	0.622354
62.3859	5.68586	16.86	11.735	32.453	0.607754
62.3859	5.68586	16.8067	11.735	32.4527	0.6059
62.3859	5.68586	16.44	11.735	32.451	0.6059
62.3859	5.68586	16.3879	11.7358	32.4514	0.6059
62.3859	5.68586	16.03	11.741	32.454	0.618646
62.3859	5.68586	15.9754	11.7413	32.4545	0.6205
62.386	5.68586	15.6	11.743	32.458	0.607754
62.386	5.68586	15.5479	11.7433	32.4581	0.6059
62.386	5.68586	15.19	11.745	32.459	0.618646
62.386	5.68586	15.1379	11.7456	32.4594	0.6205
62.386	5.68586	14.78	11.75	32.462	0.626873
62.386	5.68586	14.7267	11.7505	32.4628	0.6278
62.386	5.68586	14.36	11.754	32.468	0.6278
62.386	5.68586	14.308	11.7539	32.468	0.6278
62.386	5.68586	13.95	11.753	32.468	0.6278
62.386	5.68586	13.8983	11.7511	32.4665	0.6278
62.386	5.68586	13.54	11.738	32.456	0.615054
62.386	5.68586	13.13	11.739	32.455	0.600454
62.386	5.68586	13.0779	11.7384	32.4551	0.5986
62.386	5.68586	12.72	11.734	32.456	0.617719
62.3861	5.68586	12.6692	11.7343	32.4557	0.6205
62.3861	5.68586	12.32	11.736	32.454	0.6205
62.3861	5.68586	12.2692	11.7359	32.4539	0.6205
62.3861	5.68586	11.92	11.735	32.453	0.639619
62.3861	5.68586	11.8692	11.7349	32.4527	0.6424
62.3861	5.68586	11.52	11.734	32.451	0.629654
62.3861	5.68586	11.4718	11.7339	32.4511	0.6278
62.3861	5.68586	11.14	11.733	32.452	0.61504
62.3861	5.68586	11.0908	11.733	32.4519	0.6132
62.3861	5.68586	10.75	11.733	32.451	0.651437
62.3861	5.68586	10.6967	11.7331	32.451	0.657
62.3861	5.68586	10.33	11.734	32.451	0.625136
62.3861	5.68586	10.2779	11.7341	32.4513	0.6205
62.3861	5.68586	9.92	11.735	32.453	0.630059
62.3862	5.68586	9.51	11.734	32.452	0.641009
62.3862	5.68586	9.45793	11.734	32.4521	0.6424
62.3862	5.68586	9.1	11.734	32.453	0.648773
62.3862	5.68586	9.05047	11.7334	32.4521	0.6497
62.3862	5.68586	8.71	11.729	32.446	0.630581
62.3862	5.68586	8.66433	11.7293	32.4464	0.6278
62.3862	5.68586	8.35	11.731	32.449	0.6278
62.3862	5.68586	8.30081	11.7314	32.4496	0.6278
62.3862	5.68586	7.96	11.734	32.454	0.621427
62.3862	5.68586	7.90925	11.7336	32.4536	0.6205
62.3862	5.68586	7.56	11.731	32.451	0.63326
62.3862	5.68586	7.50829	11.7314	32.4513	0.6351
62.3862	5.68586	7.15	11.734	32.453	0.615981
62.3862	5.68586	7.09793	11.7332	32.4521	0.6132
62.3862	5.68586	6.74	11.728	32.446	0.600454
62.3862	5.68586	6.6892	11.728	32.4457	0.5986
62.3863	5.68586	6.34	11.728	32.444	0.589041
62.3863	5.68586	5.93	11.727	32.445	0.578102
62.3863	5.68586	5.88008	11.7271	32.4447	0.5767
62.3863	5.68586	5.54	11.728	32.443	0.557603
62.3863	5.68586	5.49141	11.728	32.4435	0.5548
62.3863	5.68586	5.16	11.728	32.447	0.542054
62.3863	5.68586	5.10793	11.7277	32.4466	0.5402
62.3863	5.68586	4.75	11.726	32.444	0.527454
62.3863	5.68586	4.69793	11.726	32.444	0.5256
62.3863	5.68586	4.34	11.726	32.444	0.500108
62.3863	5.68586	4.29174	11.7261	32.444	0.4964
62.3863	5.68586	3.96	11.727	32.444	0.483654
62.3863	5.68586	3.90793	11.727	32.4443	0.4818
62.3863	5.68587	3.55	11.727	32.446	0.475427
62.3863	5.68587	3.50174	11.727	32.4459	0.4745
62.3864	5.68586	3.17	11.727	32.445	0.442635
62.3864	5.68586	3.12809	11.7273	32.4451	0.438
62.3864	5.68586	2.84	11.729	32.446	0.444373
62.3864	5.68585	2.46	11.73	32.45	0.451673
62.3864	5.68585	2.41428	11.7297	32.4496	0.4526
62.3864	5.68584	2.1	11.728	32.447	0.40799
62.3864	5.68583	2.05555	11.7279	32.4466	0.4015
62.3864	5.68582	1.75	11.727	32.444	0.388754
62.3864	5.68582	1.70686	11.7271	32.4443	0.3869
62.3864	5.6858	1.41	11.728	32.446	0.39966
62.3864	5.68579	1.36712	11.7279	32.4461	0.4015
62.3864	5.68578	1.07	11.727	32.447	0.388754
62.3864	5.68577	1.03825	11.7271	32.4469	0.3869
62.3864	5.68576	0.82	11.728	32.446	0.399646
62.3864	5.68576	0.78698	11.728	32.4461	0.4015
62.3864	5.68574	0.56	11.728	32.447	0.407873
62.3864	5.68574	0.5346	11.7277	32.4467	0.4088
62.3864	5.68573	0.36	11.726	32.445	0.383308
62.3864	5.68573	0.32825	11.7259	32.4454	0.3796
62.3864	5.68572	0.11	11.725	32.448	0.373227
62.3864	5.68571	0.04	11.7	32.183	0.365942
62.3864	5.68571	0.0425749	11.7031	29.9877	0.365
62.3865	5.68571	0.06	11.724	15.131	0.358627
62.3865	5.68571	0.0587287	11.724	17.3004	0.3577
62.3865	5.68571	0.05	11.724	32.196	0.370431
62.3865	5.68566	0.0474426	11.7241	32.206	0.3723
62.3865	5.68537	0.03	11.725	32.274	0.353181
62.3865	5.68537	0.03635	11.7244	31.4809	0.3504
62.3865	5.68537	0.08	11.72	26.029	0.363146
62.3865	5.68537	0.07873	11.7206	26.8433	0.365
62.3865	5.68537	0.07	11.725	32.441	0.365
62.3865	5.68537	0.06873	11.7251	32.4416	0.365
62.3865	5.68538	0.06	11.726	32.446	0.352254
62.3865	5.68538	0.05619	11.7259	32.4463	0.3504
62.3865	5.68539	0.03	11.725	32.448	0.3504
62.3865	5.68539	0.0401702	11.7244	32.207	0.3504
62.3865	5.68539	0.11	11.72	30.552	0.363131
62.3866	5.6854	0.06	11.725	32.446	0.377746
62.3866	5.6854	0.05746	11.7251	32.4463	0.3796
62.3866	5.68539	0.04	11.726	32.448	0.360481
62.3866	5.68539	0.04254	11.726	32.4479	0.3577
62.3866	5.68539	0.06	11.726	32.447	0.3577
62.3866	5.68539	0.06127	11.726	32.4471	0.3577
62.3866	5.68539	0.07	11.726	32.448	0.351327
62.3866	5.68539	0.07	11.726	32.4479	0.3504
62.3866	5.6854	0.07	11.726	32.447	0.3504
62.3866	5.6854	0.0815085	11.7261	32.447	0.3504
62.3866	5.6854	0.16	11.727	32.447	0.356773
62.3866	5.68541	0.16762	11.7269	32.447	0.3577
62.3866	5.68541	0.22	11.726	32.447	0.351327
62.3866	5.68542	0.22889	11.726	32.447	0.3504
62.3866	5.68542	0.29	11.726	32.447	0.369519
62.3866	5.68543	0.26968	11.7261	32.447	0.3723
62.3866	5.68544	0.13	11.727	32.447	0.365927
62.3866	5.68546	0.03	11.726	32.446	0.358627
62.3866	5.68547	0.03889	11.7257	32.4459	0.3577
62.3867	5.6855	0.1	11.724	32.445	0.344954
62.3867	5.68551	0.09111	11.7241	32.4451	0.3431
62.3867	5.68554	0.03	11.725	32.446	0.349473
62.3867	5.68555	0.04143	11.7232	30.7973	0.3504
62.3867	5.68559	0.12	11.711	19.464	0.3504
62.3867	5.68559	0.139069	11.7127	21.1108	0.3504
62.3867	5.68562	0.27	11.724	32.418	0.363131
62.3867	5.68563	0.28023	11.7241	32.4209	0.365
62.3866	5.68565	0.35	11.725	32.441	0.352254
62.3866	5.68566	0.32841	11.7254	32.4416	0.3504
62.3866	5.68569	0.18	11.728	32.446	0.369519
62.3866	5.68569	0.18127	11.7279	32.4463	0.3723
62.3866	5.68572	0.19	11.727	32.448	0.353181
62.3866	5.68572	0.19508	11.7267	32.4463	0.3504
62.3866	5.68573	0.23	11.725	32.435	0.353586
62.3866	5.68574	0.24	11.724	32.446	0.357236
62.3866	5.68574	0.23111	11.7244	32.446	0.3577
62.3866	5.68575	0.17	11.727	32.446	0.3577
62.3866	5.68575	0.15857	11.7271	32.4461	0.3577
62.3865	5.68576	0.08	11.728	32.447	0.344954
62.3865	5.68576	0.08381	11.7277	32.4471	0.3431
62.3865	5.68576	0.11	11.726	32.448	0.362219
62.3865	5.68576	0.112537	11.7257	32.4479	0.365
62.3865	5.68577	0.13	11.724	32.447	0.35862
62.3865	5.68577	0.14134	11.7241	32.4467	0.3577
62.3865	5.68576	0.22	11.725	32.445	0.34494
62.3865	5.68576	0.226306	11.7253	32.4453	0.3431
62.3865	5.68577	0.27	11.727	32.447	0.368592
62.3865	5.68577	0.25983	11.7266	32.4469	0.3723
62.3865	5.68577	0.19	11.724	32.446	0.346838
[truncated: 8,606 more rows]

## Sheet: AUV_box_A
latitude	longitude	depth (m)	temperature (°C)	salinity	chlorophyll (mg m-3)
62.4177	5.65458	0.1	11.777	32.397	0.359182
62.4177	5.65458	0.1	11.776	32.377	0.370132
62.4177	5.65458	0.0901	11.7748	32.3792	0.3723
62.4177	5.65458	0.05	11.77	32.388	0.381082
62.4177	5.65458	0.09	11.777	31.2	0.392043
62.4177	5.65458	0.0821121	11.7768	31.4353	0.3942
62.4177	5.65459	0.05	11.776	32.393	0.376636
62.4177	5.65459	0.0618919	11.7649	30.5882	0.3723
62.4177	5.65459	0.11	11.72	23.287	0.366453
62.4177	5.65459	0.102056	11.7309	21.8837	0.365
62.4177	5.65459	0.07	11.775	16.221	0.376724
62.4177	5.65459	0.0640841	11.775	19.3775	0.3796
62.4177	5.65458	0.04	11.775	32.228	0.367891
62.4177	5.65458	0.04396	11.7744	32.1442	0.365
62.4177	5.65458	0.06	11.772	31.805	0.365
62.4177	5.65458	0.05802	11.7728	31.8662	0.365
62.4177	5.65458	0.05	11.776	32.114	0.382564
62.4177	5.65458	0.04604	11.7756	32.1663	0.3869
62.4177	5.65458	0.03	11.774	32.378	0.369336
62.4177	5.65458	0.0399099	11.7673	27.6682	0.365
62.4177	5.65458	0.08	11.74	8.615	0.370847
62.4177	5.65458	0.04	11.776	31.876	0.378155
62.4177	5.65458	0.04396	11.776	31.957	0.3796
62.4177	5.65458	0.06	11.776	32.285	0.385455
62.4177	5.65458	0.06594	11.776	32.307	0.3869
62.4177	5.65456	0.09	11.776	32.396	0.398609
62.4177	5.65457	0.0820721	11.7703	32.3946	0.4015
62.4177	5.65458	0.05	11.747	32.389	0.378111
62.4177	5.65458	0.06194	11.7404	27.0568	0.3723
62.4177	5.65462	0.11	11.714	5.594	0.366453
62.4177	5.65461	0.0960839	11.7263	10.6998	0.365
62.4177	5.6546	0.04	11.776	31.277	0.359145
62.4177	5.6546	0.04198	11.776	31.4689	0.3577
62.4177	5.65459	0.05	11.776	32.246	0.363555
62.4177	5.65459	0.04802	11.776	32.2759	0.365
62.4177	5.6546	0.04	11.776	32.397	0.388418
62.4177	5.6546	0.04396	11.7758	32.3891	0.3942
62.4177	5.65461	0.06	11.775	32.357	0.3942
62.4177	5.65461	0.08	11.731	32.112	0.3942
62.4177	5.65461	0.074036	11.7397	28.7457	0.3942
62.4177	5.65461	0.05	11.775	15.179	0.376636
62.4177	5.65461	0.04802	11.7748	18.5741	0.3723
62.4177	5.6546	0.04	11.774	32.326	0.384009
62.4177	5.6546	0.0618018	11.7706	28.3188	0.3869
62.4177	5.6546	0.15	11.757	12.108	0.351816
62.4177	5.6546	0.126144	11.7604	15.9198	0.3431
62.4177	5.65459	0.03	11.774	31.282	0.313827
62.4177	5.65458	0.06366	11.774	30.3724	0.3066
62.4177	5.65456	0.2	11.774	26.688	0.3066
62.4177	5.65455	0.22376	11.7742	27.818	0.3066
62.4177	5.65452	0.32	11.775	32.395	0.330018
62.4177	5.65452	0.38336	11.7754	32.396	0.3358
62.4177	5.6545	0.64	11.777	32.4	0.318236
62.4177	5.65449	0.70732	11.7772	32.3998	0.3139
62.4176	5.65447	0.98	11.778	32.399	0.325609
62.4176	5.65445	1.42	11.777	32.4	0.340209
62.4176	5.65445	1.49326	11.7774	32.3996	0.3431
62.4176	5.65444	1.79	11.779	32.398	0.360664
62.4176	5.65444	1.86722	11.7788	32.3982	0.365
62.4176	5.65444	2.18	11.778	32.399	0.382564
62.4176	5.65444	2.28098	11.7782	32.3992	0.3869
62.4176	5.65444	2.69	11.779	32.4	0.3869
62.4176	5.65444	2.79692	11.7788	32.4002	0.3869
62.4176	5.65444	3.23	11.778	32.401	0.404464
62.4176	5.65444	3.3389	11.7778	32.4006	0.4088
62.4175	5.65443	3.78	11.777	32.399	0.420509
62.4175	5.65443	3.88494	11.7774	32.3994	0.4234
62.4175	5.65442	4.31	11.779	32.401	0.446818
62.4175	5.65442	4.41098	11.7778	32.4004	0.4526
62.4175	5.6544	4.82	11.773	32.398	0.470164
62.4175	5.6544	4.93088	11.773	32.3984	0.4745
62.4175	5.65438	5.38	11.773	32.4	0.4745
62.4175	5.65436	5.94	11.775	32.4	0.4745
62.4175	5.65436	6.05088	11.775	32.4002	0.4745
62.4175	5.65434	6.5	11.775	32.401	0.503773
62.4175	5.65434	6.61088	11.7746	32.401	0.511
62.4174	5.65432	7.06	11.773	32.401	0.516855
62.4174	5.65431	7.17088	11.7734	32.4004	0.5183
62.4174	5.6543	7.62	11.775	32.398	0.524155
62.4174	5.65429	7.7289	11.7752	32.3984	0.5256
62.4174	5.65427	8.17	11.776	32.4	0.543164
62.4174	5.65427	8.28088	11.776	32.4002	0.5475
62.4174	5.65425	8.73	11.776	32.401	0.565064
62.4174	5.65425	8.83494	11.7758	32.4008	0.5694
62.4174	5.65423	9.26	11.775	32.4	0.575255
62.4174	5.65423	9.36692	11.7752	32.3998	0.5767
62.4174	5.65421	9.8	11.776	32.399	0.570845
62.4174	5.65421	9.90098	11.7756	32.3992	0.5694
62.4174	5.65419	10.31	11.774	32.4	0.575255
62.4173	5.65417	10.82	11.776	32.4	0.582555
62.4173	5.65417	10.923	11.7748	32.4	0.584
62.4173	5.65415	11.34	11.77	32.4	0.584
62.4173	5.65415	11.439	11.77	32.4006	0.584
62.4173	5.65413	11.84	11.77	32.403	0.589855
62.4173	5.65413	11.941	11.7698	32.4028	0.5913
62.4173	5.65411	12.35	11.769	32.402	0.579591
62.4173	5.65411	12.447	11.7692	32.402	0.5767
62.4173	5.65409	12.84	11.77	32.402	0.588409
62.4173	5.65409	12.943	11.7706	32.402	0.5913
62.4173	5.65407	13.36	11.773	32.402	0.585445
62.4173	5.65407	13.459	11.773	32.4016	0.584
62.4172	5.65406	13.86	11.773	32.4	0.589855
62.4172	5.65405	13.955	11.7746	32.4004	0.5913
62.4172	5.65404	14.34	11.781	32.402	0.603009
62.4172	5.65403	14.4311	11.7794	32.4014	0.6059
62.4172	5.65402	14.8	11.773	32.399	0.597118
62.4172	5.654	15.25	11.766	32.402	0.586168
62.4172	5.654	15.3431	11.7658	32.4024	0.584
62.4172	5.65398	15.72	11.765	32.404	0.589855
62.4172	5.65398	15.8131	11.7656	32.4038	0.5913
62.4172	5.65396	16.19	11.768	32.403	0.573736
62.4172	5.65396	16.285	11.768	32.4028	0.5694
62.4172	5.65395	16.67	11.768	32.402	0.604528
62.4172	5.65394	16.7611	11.7654	32.4028	0.6132
62.4171	5.65393	17.13	11.755	32.406	0.601491
62.4171	5.65392	17.2151	11.756	32.4062	0.5986
62.4171	5.65391	17.56	11.76	32.407	0.5986
62.4171	5.65391	17.6471	11.7602	32.407	0.5986
62.4171	5.65389	18	11.761	32.407	0.581036
62.4171	5.65389	18.0851	11.7616	32.4062	0.5767
62.4171	5.65388	18.43	11.764	32.403	0.594264
62.4171	5.65387	18.5191	11.7636	32.4036	0.5986
62.4171	5.65386	18.88	11.762	32.406	0.592745
62.4171	5.65384	19.31	11.764	32.403	0.585445
62.4171	5.65384	19.3951	11.7587	32.4044	0.584
62.4171	5.65383	19.74	11.737	32.41	0.595709
62.4171	5.65382	19.8232	11.736	32.4104	0.5986
62.417	5.65381	20.16	11.732	32.412	0.627873
62.417	5.6538	20.2432	11.7306	32.4138	0.6351
62.417	5.65379	20.58	11.725	32.421	0.623391
62.417	5.65379	20.6632	11.7254	32.4208	0.6205
62.417	5.65377	21	11.727	32.42	0.626355
62.417	5.65377	21.0812	11.7268	32.4198	0.6278
62.417	5.65376	21.41	11.726	32.419	0.6278
62.417	5.65375	21.4912	11.7262	32.419	0.6278
62.417	5.65374	21.82	11.727	32.419	0.604382
62.417	5.65374	21.9012	11.728	32.419	0.5986
62.417	5.65372	22.23	11.732	32.419	0.616164
62.417	5.65372	22.3132	11.7316	32.4188	0.6205
62.417	5.6537	22.65	11.73	32.418	0.614645
62.417	5.65369	23.05	11.73	32.416	0.607345
62.417	5.65368	23.1332	11.7306	32.4158	0.6059
62.4169	5.65367	23.47	11.733	32.415	0.641028
62.4169	5.65367	23.5512	11.7314	32.416	0.6497
62.4169	5.65366	23.88	11.725	32.42	0.608718
62.4169	5.65365	23.9592	11.7246	32.4204	0.5986
62.4169	5.65364	24.28	11.723	32.422	0.633728
62.4169	5.65364	24.3592	11.723	32.4216	0.6424
62.4169	5.65362	24.68	11.723	32.42	0.636545
62.4169	5.65362	24.7572	11.7228	32.4202	0.6351
62.4169	5.65361	25.07	11.722	32.421	0.623391
62.4169	5.65361	25.1452	11.7222	32.421	0.6205
62.4169	5.65359	25.45	11.723	32.421	0.6205
62.4169	5.65359	25.5252	11.7224	32.4214	0.6205
62.4169	5.65358	25.83	11.72	32.423	0.632209
62.4169	5.65357	25.9092	11.7204	32.423	0.6351
62.4169	5.65356	26.23	11.722	32.423	0.626318
62.4168	5.65354	26.6	11.723	32.421	0.615368
62.4168	5.65354	26.6772	11.7204	32.4214	0.6132
62.4168	5.65353	26.99	11.71	32.423	0.595636
62.4168	5.65352	27.0633	11.7104	32.424	0.5913
62.4168	5.65351	27.36	11.712	32.428	0.603009
62.4168	5.65351	27.4372	11.7112	32.4274	0.6059
62.4168	5.6535	27.75	11.708	32.425	0.635173
62.4168	5.65349	27.8233	11.707	32.4262	0.6424
62.4168	5.65348	28.12	11.703	32.431	0.613163
62.4168	5.65348	28.1956	11.7034	32.4308	0.6059
62.4168	5.65346	28.5	11.705	32.43	0.617595
62.4168	5.65346	28.5736	11.705	32.43	0.6205
62.4168	5.65345	28.87	11.705	32.43	0.649773
62.4168	5.65344	28.9414	11.7054	32.4298	0.657
62.4168	5.65343	29.23	11.707	32.429	0.616069
62.4168	5.65343	29.3016	11.7064	32.4288	0.6059
62.4167	5.65342	29.59	11.704	32.428	0.620537
62.4167	5.6534	29.95	11.706	32.43	0.638787
62.4167	5.6534	30.0194	11.7056	32.4298	0.6424
62.4167	5.65339	30.3	11.704	32.429	0.636553
62.4167	5.65338	30.3697	11.704	32.4292	0.6351
62.4167	5.65337	30.65	11.704	32.43	0.623405
62.4167	5.65337	30.7216	11.7038	32.4302	0.6205
62.4167	5.65335	31.01	11.703	32.431	0.6205
62.4167	5.65335	31.0797	11.7028	32.431	0.6205
62.4167	5.65334	31.36	11.702	32.431	0.626347
62.4167	5.65334	31.4316	11.702	32.431	0.6278
62.4167	5.65332	31.72	11.702	32.431	0.6278
62.4167	5.65332	31.7877	11.7014	32.4314	0.6278
62.4167	5.65331	32.06	11.699	32.433	0.621953
62.4167	5.65331	32.1316	11.699	32.4328	0.6205
62.4167	5.6533	32.42	11.699	32.432	0.626347
62.4166	5.65329	32.4857	11.699	32.4322	0.6278
62.4166	5.65328	32.75	11.699	32.433	0.624876
62.4166	5.65327	33.12	11.699	32.434	0.621226
62.4166	5.65326	33.1877	11.699	32.434	0.6205
62.4166	5.65325	33.46	11.699	32.434	0.678973
62.4166	5.65325	33.5316	11.699	32.4336	0.6935
62.4166	5.65324	33.82	11.699	32.432	0.623332
62.4166	5.65323	33.8897	11.699	32.4322	0.6059
62.4166	5.65322	34.17	11.699	32.433	0.600053
62.4166	5.65322	34.2396	11.6992	32.433	0.5986
62.4166	5.65321	34.52	11.7	32.433	0.621989
62.4166	5.6532	34.5896	11.7	32.433	0.6278
62.4166	5.65319	34.87	11.7	32.433	0.633647
62.4166	5.65319	34.9397	11.7	32.433	0.6351
62.4166	5.65318	35.22	11.7	32.433	0.646795
62.4166	5.65317	35.2897	11.7	32.4328	0.6497
62.4165	5.65316	35.57	11.7	32.432	0.608769
62.4165	5.65316	35.6397	11.7	32.4322	0.5986
62.4165	5.65315	35.92	11.7	32.433	0.616142
62.4165	5.65313	36.26	11.701	32.432	0.638042
62.4165	5.65313	36.3316	11.701	32.432	0.6424
62.4165	5.65312	36.62	11.701	32.432	0.648247
62.4165	5.65312	36.6877	11.701	32.4318	0.6497
62.4165	5.65311	36.96	11.701	32.431	0.614616
62.4165	5.6531	37.0277	11.701	32.4312	0.6059
62.4165	5.65309	37.3	11.701	32.432	0.6059
62.4165	5.65309	37.3677	11.7012	32.4322	0.6059
62.4165	5.65308	37.64	11.702	32.433	0.617595
62.4165	5.65307	37.7116	11.7018	32.433	0.6205
62.4165	5.65306	38	11.701	32.433	0.632195
62.4165	5.65306	38.0677	11.701	32.4328	0.6351
62.4165	5.65305	38.34	11.701	32.432	0.646795
62.4165	5.65305	38.4077	11.701	32.432	0.6497
62.4164	5.65303	38.68	11.701	32.432	0.629234
62.4164	5.65302	39.03	11.701	32.434	0.603684
62.4164	5.65302	39.0996	11.701	32.4336	0.5986
62.4164	5.653	39.38	11.701	32.432	0.627836
62.4164	5.653	39.4496	11.701	32.432	0.6351
62.4164	5.65299	39.73	11.701	32.432	0.617558
62.4164	5.65299	39.8016	11.701	32.4322	0.6132
62.4164	5.65297	40.09	11.701	32.433	0.636589
62.4164	5.65297	40.1557	11.701	32.4328	0.6424
62.4164	5.65296	40.42	11.701	32.432	0.624858
62.4164	5.65296	40.4518	11.701	32.4324	0.6205
62.4164	5.65295	40.58	11.701	32.434	0.6205
62.4164	5.65294	40.5681	11.701	32.4336	0.6205
62.4164	5.65293	40.52	11.701	32.432	0.608805
62.4164	5.65293	40.4742	11.701	32.4322	0.6059
62.4164	5.65292	40.29	11.701	32.433	0.6059
62.4163	5.65291	40.2263	11.701	32.433	0.6059
62.4163	5.6529	39.97	11.701	32.433	0.600053
62.4163	5.65289	39.57	11.701	32.433	0.592753
62.4163	5.65288	39.4884	11.7012	32.433	0.5913
62.4163	5.65287	39.16	11.702	32.433	0.597147
62.4163	5.65287	39.0724	11.7022	32.433	0.5986
62.4163	5.65286	38.72	11.703	32.433	0.592753
62.4163	5.65285	38.6324	11.7034	32.4324	0.5913
62.4163	5.65284	38.28	11.705	32.43	0.597147
62.4163	5.65284	38.1924	11.705	32.43	0.5986
62.4163	5.65282	37.84	11.705	32.43	0.5986
62.4163	5.65282	37.7524	11.705	32.4298	0.5986
62.4163	5.65281	37.4	11.705	32.429	0.5986
62.4163	5.6528	37.3105	11.705	32.4294	0.5986
62.4163	5.65279	36.95	11.705	32.431	0.639531
62.4163	5.65279	36.8624	11.7052	32.4308	0.6497
62.4162	5.65278	36.51	11.706	32.43	0.620464
62.4162	5.65277	36.4224	11.706	32.4302	0.6132
62.4162	5.65276	36.07	11.706	32.431	0.619047
62.4162	5.65275	35.64	11.706	32.43	0.626347
62.4162	5.65274	35.5504	11.706	32.4298	0.6278
62.4162	5.65273	35.19	11.706	32.429	0.616105
62.4162	5.65273	35.1044	11.706	32.429	0.6132
62.4162	5.65271	34.76	11.706	32.429	0.595658
62.4162	5.65271	34.6724	11.706	32.4292	0.5913
62.4162	5.6527	34.32	11.706	32.43	0.5913
62.4162	5.65269	34.2344	11.7062	32.4298	0.5913
62.4162	5.65268	33.89	11.707	32.429	0.620536
62.4162	5.65268	33.8024	11.707	32.429	0.6278
62.4162	5.65266	33.45	11.707	32.429	0.621953
62.4162	5.65266	33.3624	11.707	32.429	0.6205
62.4161	5.65265	33.01	11.707	32.429	0.597111
62.4161	5.65265	32.9264	11.707	32.4288	0.5913
62.4161	5.65263	32.59	11.707	32.428	0.602995
62.4161	5.65263	32.5024	11.707	32.4284	0.6059
62.4161	5.65262	32.15	11.707	32.43	0.597129
62.4161	5.65261	31.71	11.707	32.429	0.586179
62.4161	5.6526	31.6264	11.707	32.4288	0.584
62.4161	5.65259	31.29	11.707	32.428	0.613237
62.4161	5.65259	31.2044	11.707	32.4282	0.6205
62.4161	5.65257	30.86	11.707	32.429	0.632195
62.4161	5.65257	30.7744	11.7084	32.4286	0.6351
62.4161	5.65256	30.43	11.714	32.427	0.6351
62.4161	5.65256	30.3464	11.7138	32.4266	0.6351
62.4161	5.65254	30.01	11.713	32.425	0.623405
62.4161	5.65254	29.9264	11.7124	32.4254	0.6205
62.416	5.65253	29.59	11.71	32.427	0.608805
62.416	5.65252	29.5064	11.711	32.425	0.6059
62.416	5.65251	29.17	11.715	32.417	0.640984
62.416	5.65251	29.0844	11.716	32.4184	0.6497
62.416	5.6525	28.74	11.72	32.424	0.626311
62.416	5.6525	28.6564	11.7212	32.4232	0.6205
62.416	5.65248	28.32	11.726	32.42	0.614653
62.416	5.65247	27.91	11.727	32.419	0.607353
62.416	5.65247	27.8284	11.7276	32.4188	0.6059
62.416	5.65245	27.5	11.73	32.418	0.629289
62.416	5.65245	27.4184	11.73	32.4178	0.6351
62.416	5.65244	27.09	11.73	32.417	0.629253
62.416	5.65244	27.0083	11.731	32.4164	0.6278
62.416	5.65243	26.68	11.735	32.414	0.63948
62.416	5.65242	26.5981	11.7368	32.4142	0.6424
62.416	5.65241	26.27	11.744	32.415	0.619011
62.4159	5.65241	26.1923	11.746	32.4134	0.6132
62.4159	5.65239	25.88	11.754	32.407	0.60152
62.4159	5.65239	25.8021	11.7516	32.4074	0.5986
62.4159	5.65238	25.49	11.742	32.409	0.5986
62.4159	5.65238	25.4104	11.7426	32.4098	0.5986
62.4159	5.65236	25.09	11.745	32.413	0.592753
62.4159	5.65236	25.0083	11.7446	32.4126	0.5913
62.4159	5.65235	24.68	11.743	32.411	0.59714
62.4159	5.65233	24.26	11.746	32.412	0.604447
62.4159	5.65233	24.1803	11.7474	32.4116	0.6059
62.4159	5.65232	23.86	11.753	32.41	0.6059
62.4159	5.65232	23.778	11.7532	32.4098	0.6059
62.4159	5.65231	23.45	11.754	32.409	0.61758
62.4159	5.6523	23.372	11.7544	32.4086	0.6205
62.4159	5.65229	23.06	11.756	32.407	0.61466
62.4159	5.65229	22.9761	11.7554	32.407	0.6132
62.4158	5.65228	22.64	11.753	32.407	0.607353
62.4158	5.65227	22.5583	11.751	32.4072	0.6059
62.4158	5.65226	22.23	11.743	32.408	0.61174
62.4158	5.65226	22.15	11.7448	32.4084	0.6132
62.4158	5.65225	21.83	11.752	32.41	0.59568
62.4158	5.65224	21.748	11.7514	32.4096	0.5913
62.4158	5.65223	21.42	11.749	32.408	0.60882
62.4158	5.65223	21.338	11.749	32.4082	0.6132
62.4158	5.65222	21.01	11.749	32.409	0.6132
62.4158	5.6522	20.6	11.746	32.41	0.6132
62.4158	5.6522	20.516	11.7464	32.4104	0.6132
62.4158	5.65219	20.18	11.748	32.412	0.6132
62.4158	5.65218	20.096	11.7478	32.4116	0.6132
62.4158	5.65217	19.76	11.747	32.41	0.59568
62.4158	5.65217	19.678	11.7476	32.41	0.5913
62.4158	5.65215	19.35	11.75	32.41	0.59714
62.4157	5.65215	19.268	11.7506	32.4096	0.5986
62.4157	5.65214	18.94	11.753	32.408	0.58692
62.4157	5.65214	18.856	11.7522	32.4084	0.584
62.4157	5.65213	18.52	11.749	32.41	0.60736
62.4157	5.65212	18.438	11.7496	32.4098	0.6132
62.4157	5.65211	18.11	11.752	32.409	0.60152
62.4157	5.65211	18.028	11.7518	32.4088	0.5986
62.4157	5.6521	17.7	11.751	32.408	0.61612
62.4157	5.65209	17.62	11.7514	32.408	0.6205
62.4157	5.65208	17.3	11.753	32.408	0.6205
62.4157	5.65207	16.91	11.75	32.407	0.6205
62.4157	5.65206	16.83	11.7504	32.4074	0.6205
62.4157	5.65205	16.51	11.752	32.409	0.60298
62.4157	5.65205	16.432	11.7522	32.4088	0.5986
62.4157	5.65204	16.12	11.753	32.408	0.61028
62.4157	5.65204	16.04	11.7528	32.4082	0.6132
62.4156	5.65203	15.72	11.752	32.409	0.60736
62.4156	5.65202	15.64	11.752	32.4086	0.6059
62.4156	5.65201	15.32	11.752	32.407	0.6059
62.4156	5.65201	15.24	11.7514	32.4072	0.6059
62.4156	5.652	14.92	11.749	32.408	0.60006
62.4156	5.652	14.84	11.7496	32.4082	0.5986
62.4156	5.65198	14.52	11.752	32.409	0.60444
62.4156	5.65198	14.44	11.7512	32.409	0.6059
62.4156	5.65197	14.12	11.748	32.409	0.61174
62.4156	5.65197	14.04	11.75	32.4088	0.6132
62.4156	5.65195	13.72	11.758	32.408	0.60444
62.4156	5.65194	13.33	11.771	32.403	0.59349
62.4156	5.65194	13.25	11.7714	32.4028	0.5913
62.4156	5.65193	12.93	11.773	32.402	0.61466
62.4156	5.65192	12.852	11.773	32.4012	0.6205
62.4156	5.65191	12.54	11.773	32.398	0.63218
62.4156	5.65191	12.462	11.7736	32.3986	0.6351
62.4155	5.6519	12.15	11.776	32.401	0.62926
62.4155	5.6519	12.074	11.7766	32.4006	0.6278
62.4155	5.65188	11.77	11.779	32.399	0.60444
62.4155	5.65188	11.692	11.7774	32.3992	0.5986
62.4155	5.65187	11.38	11.771	32.4	0.60444
62.4155	5.65187	11.302	11.7712	32.4004	0.6059
62.4155	5.65185	10.99	11.772	32.402	0.59422
62.4155	5.65185	10.906	11.771	32.4018	0.5913
62.4155	5.65184	10.57	11.767	32.401	0.6205
62.4155	5.65184	10.484	11.7674	32.4016	0.6278
62.4155	5.65183	10.14	11.769	32.404	0.61904
62.4155	5.65181	9.73	11.773	32.401	0.60809
62.4155	5.65181	9.652	11.7746	32.4006	0.6059
62.4155	5.65179	9.34	11.781	32.399	0.59422
62.4155	5.65179	9.266	11.781	32.3988	0.5913
62.4155	5.65178	8.97	11.781	32.398	0.58546
62.4155	5.65178	8.892	11.7808	32.398	0.584
62.4154	5.65177	8.58	11.78	32.398	0.6132
62.4154	5.65177	8.5	11.7794	32.3986	0.6205
62.4154	5.65176	8.18	11.777	32.401	0.58546
62.4154	5.65175	8.098	11.7766	32.4008	0.5767
62.4154	5.65174	7.77	11.775	32.4	0.58254
62.4154	5.65174	7.692	11.7758	32.4	0.584
62.4154	5.65172	7.38	11.779	32.4	0.56648
62.4154	5.65172	7.3	11.7788	32.4002	0.5621
62.4154	5.65171	6.98	11.778	32.401	0.5621
62.4154	5.65171	6.898	11.7772	32.4008	0.5621
62.4154	5.65169	6.57	11.774	32.4	0.55918
62.4154	5.65168	6.16	11.783	32.399	0.55553
62.4154	5.65168	6.082	11.783	32.3988	0.5548
62.4154	5.65167	5.77	11.783	32.398	0.53728
62.4154	5.65166	5.69	11.7826	32.3978	0.5329
62.4154	5.65165	5.37	11.781	32.397	0.51538
62.4154	5.65165	5.28391	11.7812	32.3974	0.511
62.4153	5.65164	4.94	11.782	32.399	0.481836
62.4153	5.65163	4.84964	11.7816	32.399	0.4745
62.4153	5.65162	4.49	11.78	32.399	0.45114
62.4153	5.65162	4.40792	11.7804	32.3988	0.4453
62.4153	5.6516	4.08	11.782	32.398	0.433635
62.4153	5.6516	4.01173	11.7818	32.3984	0.4307
62.4153	5.65159	3.74	11.781	32.4	0.41902
62.4153	5.65159	3.68	11.7808	32.3998	0.4161
62.4153	5.65159	3.44	11.78	32.399	0.42194
62.4153	5.65159	3.376	11.7808	32.399	0.4234
62.4153	5.65159	3.12	11.784	32.399	0.41756
62.4153	5.65159	2.77	11.784	32.397	0.41026
62.4153	5.65159	2.696	11.7842	32.3972	0.4088
62.4153	5.65159	2.4	11.785	32.398	0.38544
62.4153	5.65159	2.328	11.7846	32.398	0.3796
62.4153	5.6516	2.04	11.783	32.398	0.38544
62.4153	5.6516	1.972	11.7836	32.398	0.3869
62.4152	5.65161	1.7	11.786	32.398	0.36938
62.4152	5.65161	1.632	11.7864	32.3978	0.365
62.4152	5.65163	1.36	11.788	32.397	0.35916
62.4152	5.65163	1.28	11.788	32.397	0.3577
62.4152	5.65164	0.96	11.788	32.397	0.35186
62.4152	5.65164	0.916	11.7878	32.397	0.3504
62.4152	5.65164	0.74	11.787	32.397	0.3504
62.4152	5.65164	0.74	11.7868	32.3972	0.3504
62.4152	5.65164	0.74	11.786	32.398	0.36792
62.4152	5.65164	0.742	11.7862	32.398	0.3723
62.4152	5.65164	0.75	11.787	32.398	0.36062
62.4152	5.65164	0.71	11.788	32.398	0.34602
62.4152	5.65164	0.702	11.7878	32.3978	0.3431
62.4152	5.65164	0.67	11.787	32.397	0.37814
62.4152	5.65164	0.666	11.787	32.3968	0.3869
62.4152	5.65164	0.65	11.787	32.396	0.37522
62.4152	5.65164	0.618	11.787	32.3962	0.3723
62.4152	5.65164	0.49	11.787	32.397	0.35478
62.4152	5.65149	0.46	11.787	32.397	0.3504
62.4153	5.65093	0.34	11.787	32.397	0.36792
62.4153	5.65093	0.312	11.787	32.3968	0.3723
62.4153	5.65095	0.2	11.787	32.396	0.34894
62.4153	5.65095	0.174	11.787	32.396	0.3431
62.4153	5.65095	0.07	11.787	32.396	0.33726
62.4153	5.65094	0.076	11.7862	32.396	0.3358
62.4153	5.65093	0.1	11.783	32.396	0.34164
62.4153	5.65092	0.088	11.7832	32.3962	0.3431
62.4153	5.65092	0.04	11.784	32.397	0.3431
62.4153	5.65091	0.05	11.782	32.396	0.3431
62.4153	5.65091	0.058	11.781	32.3964	0.3431
62.4153	5.6509	0.09	11.777	32.398	0.33142
62.4153	5.65089	0.08	11.7782	32.3978	0.3285
62.4153	5.65088	0.04	11.783	32.397	0.31682
62.4153	5.65088	0.05	11.7836	32.3972	0.3139
62.4153	5.65086	0.09	11.786	32.398	0.30222
62.4153	5.65086	0.082	11.7856	32.3976	0.2993
62.4153	5.65085	0.05	11.784	32.396	0.31682
62.4152	5.65085	0.068	11.7842	32.3964	0.3212
62.4152	5.65083	0.14	11.785	32.398	0.30368
62.4152	5.65083	0.12	11.785	32.3978	0.2993
62.4152	5.65083	0.04	11.785	32.397	0.31098
62.4152	5.65082	0.056	11.7828	30.4872	0.3139
62.4152	5.65081	0.12	11.774	22.848	0.31974
62.4152	5.65081	0.138	11.776	24.7444	0.3212
62.4152	5.65082	0.21	11.784	32.33	0.31828
62.4152	5.65083	0.39	11.782	32.398	0.31463
62.4152	5.65083	0.368	11.7824	32.3978	0.3139
62.4152	5.65083	0.28	11.784	32.397	0.3139
62.4152	5.65084	0.23	11.7832	32.3974	0.3139
62.4152	5.65086	0.03	11.78	32.399	0.31974
62.4152	5.65086	0.056	11.773	27.6034	0.3212
62.4151	5.65088	0.16	11.745	8.421	0.32704
62.4151	5.65089	0.19	11.7518	13.201	0.3285
62.4151	5.6509	0.31	11.779	32.321	0.31098
62.4151	5.65091	0.264	11.7794	32.3334	0.3066
62.4151	5.65093	0.08	11.781	32.383	0.3066
62.4151	5.65093	0.071992	11.7728	30.9692	0.3066
62.4151	5.65095	0.04	11.74	25.321	0.294935
62.4151	5.65096	0.0560639	11.7442	23.5094	0.292
62.4151	5.65099	0.12	11.761	16.299	0.3212
62.4151	5.651	0.158	11.7648	19.3588	0.3285
62.4151	5.65103	0.31	11.78	31.598	0.31974
62.4151	5.65106	0.31	11.783	32.398	0.30879
62.4151	5.65106	0.26	11.7828	32.3978	0.3066
62.4151	5.65109	0.06	11.782	32.397	0.30076
62.4151	5.65109	0.06	11.7812	32.397	0.2993
62.4151	5.6511	0.06	11.778	32.397	0.30514
62.4151	5.65111	0.084	11.7794	32.3972	0.3066
62.4151	5.65112	0.18	11.785	32.398	0.30076
62.4151	5.65112	0.214	11.785	32.3978	0.2993
62.4151	5.65114	0.35	11.785	32.397	0.2993
62.4152	5.65114	0.3	11.7842	32.397	0.2993
62.4152	5.65117	0.1	11.781	32.397	0.2993
62.4152	5.65117	0.104	11.781	32.397	0.2993
62.4152	5.65118	0.12	11.781	32.397	0.32266
62.4152	5.65119	0.116	11.782	32.3968	0.3285
62.4152	5.6512	0.1	11.786	32.396	0.32266
62.4152	5.65121	0.092	11.7856	32.3962	0.3212
62.4152	5.65122	0.06	11.784	32.397	0.3212
62.4153	5.65124	0.13	11.784	32.397	0.3212
62.4153	5.65125	0.112	11.7846	32.3972	0.3212
62.4153	5.65127	0.04	11.787	32.398	0.3212
62.4153	5.65128	0.058	11.7868	32.398	0.3212
62.4153	5.6513	0.13	11.786	32.398	0.3212
62.4153	5.65131	0.142	11.7858	32.3978	0.3212
62.4153	5.65134	0.19	11.785	32.397	0.32704
62.4153	5.65134	0.246	11.7842	32.3972	0.3285
62.4153	5.65136	0.47	11.781	32.398	0.31682
62.4153	5.65137	0.512	11.7816	32.398	0.3139
62.4153	5.65138	0.68	11.784	32.398	0.3139
62.4153	5.65139	0.716	11.7828	32.3982	0.3139
62.4153	5.65141	0.86	11.778	32.399	0.31974
62.4153	5.65141	0.92	11.7782	32.399	0.3212
62.4153	5.65142	1.16	11.779	32.399	0.33872
62.4153	5.65142	1.24	11.779	32.3994	0.3431
62.4153	5.65145	1.56	11.779	32.401	0.33434
62.4153	5.65149	2.03	11.778	32.4	0.32339
62.4153	5.65149	2.122	11.778	32.4002	0.3212
62.4153	5.65152	2.49	11.778	32.401	0.33872
62.4153	5.65152	2.566	11.7776	32.4008	0.3431
62.4153	5.65154	2.87	11.776	32.4	0.36646
62.4153	5.65155	2.93807	11.7756	32.4	0.3723
62.4153	5.65156	3.21	11.774	32.4	0.3723
62.4153	5.65157	3.29241	11.7748	32.4002	0.3723
62.4153	5.65158	3.62	11.778	32.401	0.383965
62.4153	5.65159	3.71648	11.778	32.4004	0.3869
62.4153	5.6516	4.1	11.778	32.398	0.392733
62.4153	5.6516	4.19447	11.7778	32.3986	0.3942
62.4153	5.6516	4.57	11.777	32.401	0.411698
62.4153	5.6516	4.66246	11.7766	32.401	0.4161
62.4152	5.65159	5.03	11.775	32.401	0.433598
62.4152	5.65159	5.11241	11.7746	32.401	0.438
62.4152	5.65158	5.44	11.773	32.401	0.455498
62.4152	5.65156	5.84	11.772	32.401	0.477398
62.4152	5.65156	5.9204	11.7724	32.401	0.4818
62.4152	5.65154	6.24	11.774	32.401	0.4818
62.4152	5.65154	6.32643	11.7738	32.401	0.4818
62.4152	5.65151	6.67	11.773	32.401	0.487633
62.4152	5.65151	6.75844	11.7758	32.401	0.4891
62.4152	5.65149	7.11	11.787	32.401	0.500765
62.4152	5.65148	7.1904	11.7868	32.4004	0.5037
62.4152	5.65146	7.51	11.786	32.398	0.521198
62.4152	5.65145	7.59643	11.786	32.3978	0.5256
62.4152	5.65143	7.94	11.786	32.397	0.519767
62.4152	5.65142	8.02643	11.7858	32.3974	0.5183
62.4152	5.6514	8.37	11.785	32.399	0.524133
62.4152	5.65139	8.46045	11.7852	32.3988	0.5256
62.4152	5.65137	8.82	11.786	32.398	0.548931
62.4152	5.65137	8.91246	11.785	32.3982	0.5548
62.4152	5.65135	9.28	11.781	32.399	0.563549
62.4152	5.65132	9.7	11.778	32.4	0.57451
62.4152	5.65132	9.782	11.7764	32.3998	0.5767
62.4152	5.6513	10.11	11.77	32.399	0.58838
62.4152	5.65129	10.194	11.7692	32.4	0.5913
62.4152	5.65127	10.53	11.766	32.404	0.59714
62.4152	5.65126	10.614	11.7646	32.4044	0.5986
62.4153	5.65124	10.95	11.759	32.406	0.58692
62.4153	5.65123	11.036	11.7586	32.4058	0.584
62.4153	5.6512	11.38	11.757	32.405	0.59568
62.4153	5.6512	11.4701	11.761	32.4048	0.5986
62.4153	5.65117	11.83	11.777	32.404	0.586935
62.4153	5.65117	11.9225	11.7778	32.403	0.584
62.4153	5.65114	12.29	11.781	32.399	0.589833
62.4153	5.65113	12.3784	11.7818	32.3992	0.5913
62.4153	5.65111	12.73	11.785	32.4	0.585467
62.4153	5.6511	12.8225	11.7854	32.3992	0.584
62.4153	5.65108	13.19	11.787	32.396	0.584
62.4153	5.65104	13.64	11.779	32.399	0.584
62.4153	5.65103	13.7304	11.7784	32.3994	0.584
62.4153	5.65101	14.09	11.776	32.401	0.618996
62.4153	5.651	14.1805	11.774	32.4014	0.6278
62.4153	5.65098	14.54	11.766	32.403	0.604469
62.4153	5.65097	14.6264	11.7658	32.4032	0.5986
62.4153	5.65094	14.97	11.765	32.404	0.621931
62.4153	5.65094	15.0584	11.764	32.4042	0.6278
62.4153	5.65091	15.41	11.76	32.405	0.621967
62.4153	5.6509	15.4963	11.7606	32.4048	0.6205
62.4153	5.65087	15.84	11.763	32.404	0.5913
62.4153	5.65087	15.9261	11.7624	32.4042	0.584
62.4153	5.65084	16.27	11.76	32.405	0.595665
62.4153	5.65083	16.3544	11.7608	32.405	0.5986
62.4153	5.65081	16.69	11.764	32.405	0.5986
62.4153	5.6508	16.7724	11.7626	32.405	0.5986
62.4153	5.65078	17.1	11.757	32.405	0.604433
62.4153	5.65074	17.5	11.755	32.407	0.611733
62.4153	5.65074	17.5824	11.7554	32.4066	0.6132
62.4153	5.65071	17.91	11.757	32.405	0.595702
62.4153	5.6507	17.9924	11.757	32.4052	0.5913
62.4153	5.65068	18.32	11.757	32.406	0.5913
62.4153	5.65067	18.4064	11.7568	32.4062	0.5913
62.4153	5.65065	18.75	11.756	32.407	0.602965
62.4153	5.65064	18.8425	11.7608	32.4062	0.6059
62.4153	5.65061	19.21	11.78	32.403	0.600067
62.4153	5.65061	19.2964	11.7786	32.4024	0.5986
62.4153	5.65058	19.64	11.773	32.4	0.592767
62.4153	5.65058	19.7224	11.7706	32.4008	0.5913
62.4153	5.65055	20.05	11.761	32.404	0.620463
62.4153	5.65054	20.1324	11.7614	32.4044	0.6278
62.4153	5.65052	20.46	11.763	32.406	0.592804
62.4153	5.65051	20.5384	11.7618	32.4058	0.584
62.4153	5.65049	20.85	11.757	32.405	0.595665
62.4153	5.65045	21.24	11.757	32.406	0.610265
62.4153	5.65045	21.3204	11.7574	32.4062	0.6132
62.4153	5.65042	21.64	11.759	32.407	0.589869
62.4153	5.65042	21.7124	11.7596	32.4066	0.584
62.4153	5.65039	22	11.762	32.405	0.601498
62.4153	5.65039	22.0764	11.7612	32.4056	0.6059
62.4153	5.65036	22.38	11.758	32.408	0.600067
62.4153	5.65036	22.4584	11.7582	32.408	0.5986
62.4153	5.65033	22.77	11.759	32.408	0.592767
62.4153	5.65032	22.8504	11.7586	32.4076	0.5913
62.4153	5.6503	23.17	11.757	32.406	0.597133
62.4153	5.65029	23.2484	11.7562	32.4064	0.5986
62.4153	5.65027	23.56	11.753	32.408	0.592767
62.4153	5.65026	23.6404	11.7528	32.4082	0.5913
62.4153	5.65024	23.96	11.752	32.409	0.597133
62.4153	5.65023	24.0344	11.752	32.4088	0.5986
62.4153	5.65021	24.33	11.752	32.408	0.5986
62.4153	5.65018	24.7	11.751	32.409	0.5986
62.4153	5.65017	24.7764	11.7512	32.4088	0.5986
62.4153	5.65015	25.08	11.752	32.408	0.5986
62.4153	5.65014	25.1584	11.7518	32.4082	0.5986
62.4153	5.65012	25.47	11.751	32.409	0.610265
62.4153	5.65011	25.5484	11.7512	32.4086	0.6132
62.4153	5.65009	25.86	11.752	32.407	0.607367
62.4153	5.65008	25.9344	11.7514	32.4074	0.6059
62.4153	5.65006	26.23	11.749	32.409	0.600067
62.4153	5.65005	26.3064	11.7488	32.4092	0.5986
62.4153	5.65003	26.61	11.748	32.41	0.616098
62.4153	5.65002	26.6844	11.7472	32.41	0.6205
62.4153	5.65	26.98	11.744	32.41	0.608835
62.4153	5.64999	27.0524	11.7434	32.4104	0.6059
62.4153	5.64997	27.34	11.741	32.412	0.611733
62.4153	5.64996	27.4104	11.7426	32.4118	0.6132
62.4153	5.64994	27.69	11.749	32.411	0.619033
62.4153	5.64991	28.05	11.747	32.408	0.626333
62.4153	5.64991	28.1203	11.7466	32.4088	0.6278
62.4153	5.64988	28.4	11.745	32.412	0.621967
62.4153	5.64988	28.4703	11.7434	32.4116	0.6205
62.4153	5.64985	28.75	11.737	32.41	0.626333
62.4153	5.64985	28.8183	11.738	32.4104	0.6278
62.4153	5.64982	29.09	11.742	32.412	0.592804
62.4153	5.64982	29.1644	11.7398	32.412	0.584
62.4153	5.64979	29.46	11.731	32.412	0.578167
62.4153	5.64979	29.5324	11.7302	32.4132	0.5767
62.4153	5.64976	29.82	11.727	32.418	0.605864
62.4153	5.64976	29.8904	11.7258	32.4178	0.6132
62.4153	5.64973	30.17	11.721	32.417	0.6132
62.4153	5.64973	30.2383	11.7212	32.418	0.6132
62.4153	5.6497	30.51	11.722	32.422	0.6132
62.4153	5.6497	30.5803	11.722	32.4218	0.6132
62.4153	5.64967	30.86	11.722	32.421	0.633614
62.4153	5.64964	31.21	11.721	32.422	0.659164
62.4153	5.64964	31.2803	11.7212	32.4222	0.6643
62.4153	5.64961	31.56	11.722	32.423	0.617638
62.4153	5.64961	31.6344	11.722	32.4224	0.6059
62.4153	5.64959	31.93	11.722	32.42	0.594235
62.4153	5.64958	32.0024	11.7234	32.4196	0.5913
62.4153	5.64956	32.29	11.729	32.418	0.626296
62.4153	5.64955	32.3624	11.729	32.418	0.6351
62.4153	5.64953	32.65	11.729	32.418	0.617602
62.4153	5.64952	32.7224	11.7274	32.418	0.6132
62.4153	5.6495	33.01	11.721	32.418	0.607367
62.4153	5.64949	33.0804	11.7208	32.4188	0.6059
62.4153	5.64947	33.36	11.72	32.422	0.6059
62.4153	5.64946	33.4324	11.7202	32.422	0.6059
62.4153	5.64944	33.72	11.721	32.422	0.617565
62.4153	5.64944	33.7883	11.7208	32.422	0.6205
62.4153	5.64941	34.06	11.72	32.422	0.617584
62.4153	5.64938	34.42	11.722	32.42	0.613934
62.4153	5.64938	34.4924	11.722	32.42	0.6132
62.4153	5.64935	34.78	11.722	32.42	0.6132
62.4153	5.64935	34.8524	11.722	32.4202	0.6132
62.4153	5.64933	35.14	11.722	32.421	0.607367
62.4153	5.64932	35.2124	11.7222	32.421	0.6059
62.4153	5.6493	35.5	11.723	32.421	0.629231
62.4153	5.64929	35.5703	11.7228	32.421	0.6351
62.4153	5.64927	35.85	11.722	32.421	0.611769
62.4153	5.64926	35.9203	11.7216	32.421	0.6059
62.4153	5.64924	36.2	11.72	32.421	0.594235
62.4153	5.64923	36.2744	11.7204	32.4208	0.5913
62.4153	5.64921	36.57	11.722	32.42	0.602965
62.4153	5.6492	36.6403	11.7214	32.4206	0.6059
62.4153	5.64918	36.92	11.719	32.423	0.600067
62.4153	5.64918	36.9924	11.7188	32.4226	0.5986
62.4153	5.64915	37.28	11.718	32.421	0.595684
62.4153	5.64912	37.62	11.718	32.422	0.592034
62.4153	5.64912	37.6904	11.718	32.4224	0.5913
62.4153	5.6491	37.97	11.718	32.424	0.585467
62.4153	5.64909	38.0403	11.718	32.424	0.584
62.4153	5.64907	38.32	11.718	32.424	0.613164
62.4153	5.64906	38.3924	11.718	32.4238	0.6205
62.4153	5.64904	38.68	11.718	32.423	0.608835
62.4153	5.64903	38.7483	11.7182	32.4228	0.6059
62.4153	5.64901	39.02	11.719	32.422	0.611733
62.4153	5.64901	39.0924	11.719	32.422	0.6132
62.4153	5.64898	39.38	11.719	32.422	0.595702
62.4153	5.64898	39.4544	11.719	32.4222	0.5913
62.4153	5.64895	39.75	11.719	32.423	0.602965
62.4153	5.64895	39.8204	11.7188	32.4228	0.6059
62.4153	5.64893	40.1	11.718	32.422	0.6059
62.4153	5.64892	40.1706	11.7178	32.4222	0.6059
62.4153	5.6489	40.45	11.717	32.423	0.597151
62.4153	5.64887	40.81	11.717	32.423	0.586201
62.4153	5.64886	40.8824	11.7168	32.423	0.584
62.4153	5.64884	41.17	11.716	32.423	0.613164
62.4153	5.64884	41.2403	11.7158	32.4234	0.6205
62.4153	5.64881	41.52	11.715	32.425	0.591336
62.4153	5.64881	41.5944	11.715	32.4252	0.584
62.4153	5.64879	41.89	11.715	32.426	0.584
62.4153	5.64878	41.9603	11.715	32.4262	0.584
62.4153	5.64876	42.24	11.715	32.427	0.584
62.4153	5.64875	42.3124	11.715	32.4272	0.584
62.4153	5.64873	42.6	11.715	32.428	0.601498
62.4153	5.64872	42.6703	11.7148	32.4282	0.6059
62.4153	5.6487	42.95	11.714	32.429	0.600067
62.4153	5.6487	43.0224	11.7142	32.4294	0.5986
62.4153	5.64867	43.31	11.715	32.431	0.5986
62.4153	5.64867	43.3806	11.715	32.431	0.5986
62.4153	5.64865	43.66	11.715	32.431	0.595684
62.4153	5.64862	44.02	11.715	32.432	0.592037
62.4153	5.64861	44.0906	11.7146	32.4318	0.5913
62.4153	5.64859	44.37	11.713	32.431	0.602965
62.4153	5.64858	44.4383	11.7132	32.431	0.6059
62.4153	5.64856	44.71	11.714	32.431	0.582569
62.4153	5.64856	44.7804	11.714	32.4308	0.5767
62.4153	5.64853	45.06	11.714	32.43	0.594176
62.4153	5.64853	45.1326	11.7138	32.4306	0.5986
62.4153	5.64851	45.42	11.713	32.433	0.586935
62.4153	5.6485	45.4883	11.7126	32.433	0.584
62.4153	5.64848	45.76	11.711	32.433	0.618996
62.4153	5.64847	45.8284	11.7112	32.4332	0.6278
62.4153	5.64845	46.1	11.712	32.434	0.581197
62.4153	5.64844	46.1727	11.7116	32.434	0.5694
62.4153	5.64842	46.46	11.71	32.434	0.592702
62.4153	5.64841	46.5287	11.7098	32.4342	0.5986
62.4153	5.64839	46.8	11.709	32.435	0.595687
62.4153	5.64836	47.14	11.709	32.437	0.592037
62.4153	5.64836	47.2126	11.7088	32.4376	0.5913
62.4153	5.64833	47.5	11.708	32.44	0.5913
62.4153	5.64833	47.5703	11.7078	32.4406	0.5913
62.4153	5.6483	47.85	11.707	32.443	0.602965
62.4153	5.6483	47.9183	11.7074	32.4442	0.6059
62.4153	5.64827	48.19	11.709	32.449	0.570904
62.4153	5.64827	48.2624	11.7092	32.4492	0.5621
62.4153	5.64824	48.55	11.71	32.45	0.585402
62.4153	5.64824	48.6207	11.7102	32.4504	0.5913
62.4153	5.64821	48.9	11.711	32.452	0.550522
62.4153	5.64821	48.9707	11.711	32.4522	0.5402
62.4153	5.64818	49.25	11.711	32.453	0.563502
62.4153	5.64818	49.3187	11.7104	32.4538	0.5694
62.4153	5.64815	49.59	11.708	32.457	0.551924
62.4153	5.64815	49.6607	11.7032	32.4598	0.5475
62.4153	5.64812	49.94	11.684	32.471	0.550413
62.4153	5.64809	50.28	11.68	32.496	0.554063
62.4153	5.64809	50.3487	11.6796	32.4962	0.5548
62.4153	5.64806	50.62	11.678	32.497	0.5548
62.4153	5.64806	50.6887	11.6738	32.4994	0.5548
62.4153	5.64803	50.96	11.657	32.509	0.543149
62.4153	5.64803	51.0287	11.6479	32.5114	0.5402
62.4153	5.648	51.3	11.612	32.521	0.481946
62.4153	5.648	51.3687	11.5684	32.542	0.4672
62.4153	5.64797	51.64	11.396	32.625	0.438073
62.4153	5.64796	51.7107	11.3819	32.6539	0.4307
62.4153	5.64794	51.99	11.326	32.768	0.419049
62.4153	5.64793	52.0607	11.3185	32.7785	0.4161
62.4153	5.64791	52.34	11.289	32.82	0.421925
62.4153	5.6479	52.4127	11.2704	32.8285	0.4234
62.4153	5.64788	52.7	11.197	32.862	0.365146
62.4153	5.64788	52.7707	11.1212	32.8877	0.3504
62.4153	5.64785	53.05	10.822	32.989	0.338749
62.4153	5.64782	53.39	10.697	33.162	0.324149
62.4153	5.64782	53.4627	10.6768	33.1723	0.3212
62.4153	5.64779	53.75	10.597	33.213	0.3212
62.4153	5.64779	53.8187	10.5857	33.2172	0.3212
62.4153	5.64777	54.09	10.541	33.234	0.315375
62.4153	5.64776	54.1607	10.5261	33.2421	0.3139
62.4153	5.64774	54.44	10.467	33.274	0.3139
62.4153	5.64773	54.5067	10.463	33.2793	0.3139
62.4153	5.64771	54.77	10.447	33.3	0.302249
62.4153	5.64771	54.8367	10.4397	33.3026	0.2993
62.4153	5.64768	55.1	10.411	33.313	0.287649
62.4153	5.64768	55.1667	10.4064	33.316	0.2847
62.4153	5.64766	55.43	10.388	33.328	0.308002
62.4153	5.64765	55.4946	10.3809	33.3298	0.3139
62.4153	5.64763	55.75	10.353	33.337	0.290598
62.4153	5.64763	55.8146	10.3467	33.3431	0.2847
62.4153	5.6476	56.07	10.322	33.367	0.290525
62.4153	5.64758	56.38	10.295	33.382	0.297825
62.4153	5.64757	56.4446	10.2724	33.3858	0.2993
62.4153	5.64755	56.7	10.183	33.401	0.2993
62.4153	5.64754	56.7626	10.1656	33.4111	0.2993
62.4153	5.64752	57.01	10.097	33.451	0.293475
62.4153	5.64752	57.0767	10.0653	33.4595	0.292
62.4153	5.64749	57.34	9.94	33.493	0.280349
62.4153	5.64749	57.4067	9.93394	33.5037	0.2774
62.4153	5.64747	57.67	9.91	33.546	0.271575
62.4153	5.64746	57.7367	9.90798	33.5478	0.2701
62.4153	5.64744	58	9.9	33.555	0.281751
62.4153	5.64743	58.0687	9.89798	33.5548	0.2847
62.4153	5.64741	58.34	9.89	33.554	0.273049
62.4153	5.64741	58.4046	9.88879	33.5544	0.2701
62.4153	5.64739	58.66	9.884	33.556	0.2701
62.4153	5.64738	58.7186	9.88279	33.5566	0.2701
62.4153	5.64736	58.95	9.878	33.559	0.284664
62.4153	5.64733	59.19	9.886	33.556	0.302914
62.4153	5.64733	59.2243	9.88519	33.5556	0.3066
62.4153	5.6473	59.36	9.882	33.554	0.283298
62.4153	5.6473	59.3822	9.88038	33.555	0.2774
62.4153	5.64728	59.47	9.874	33.559	0.271575
62.4153	5.64727	59.4639	9.87501	33.5596	0.2701
62.4153	5.64725	59.44	9.879	33.562	0.264275
62.4153	5.64724	59.3976	9.88082	33.5612	0.2628
62.4153	5.64722	59.23	9.888	33.558	0.268625
62.4153	5.64721	59.1674	9.89143	33.5564	0.2701
62.4153	5.64719	58.92	9.905	33.55	0.2701
62.4153	5.64719	58.8453	9.90581	33.5496	0.2701
62.4153	5.64716	58.55	9.909	33.548	0.281751
62.4153	5.64716	58.4672	9.9094	33.5478	0.2847
62.4153	5.64714	58.14	9.911	33.547	0.267224
62.4153	5.64713	58.0531	9.91221	33.5468	0.2628
62.4153	5.64711	57.71	9.917	33.546	0.271538
62.4153	5.64708	57.28	9.964	33.541	0.282488
62.4153	5.64708	57.1911	10.0097	33.5285	0.2847
62.4153	5.64705	56.84	10.19	33.479	0.273049
62.4153	5.64705	56.7531	10.2001	33.4679	0.2701
62.4153	5.64703	56.41	10.24	33.424	0.293402
62.4153	5.64702	56.3211	10.2539	33.4218	0.2993
62.4153	5.647	55.97	10.309	33.413	0.2993
62.4153	5.64699	55.8831	10.3252	33.4041	0.2993
62.4153	5.64697	55.54	10.389	33.369	0.2993
62.4153	5.64696	55.4531	10.3949	33.3615	0.2993
62.4153	5.64694	55.11	10.418	33.332	0.305125
62.4153	5.64694	55.0211	10.4247	33.3282	0.3066
62.4153	5.64691	54.67	10.451	33.313	0.294949
62.4153	5.64691	54.5831	10.4569	33.3096	0.292
62.4153	5.64689	54.24	10.48	33.296	0.297825
62.4153	5.64688	54.1531	10.4952	33.2916	0.2993
62.4153	5.64686	53.81	10.555	33.274	0.296387
62.4153	5.64683	53.37	10.619	33.231	0.292737
62.4153	5.64683	53.2811	10.6382	33.2241	0.292
62.4153	5.64681	52.93	10.714	33.197	0.303651
62.4153	5.6468	52.8431	10.7706	33.1837	0.3066
62.4153	5.64678	52.5	10.994	33.131	0.318251
62.4153	5.64677	52.4131	11.0552	33.0855	0.3212
62.4153	5.64675	52.07	11.297	32.906	0.367803
62.4153	5.64674	51.9852	11.3091	32.8858	0.3796
62.4153	5.64672	51.65	11.357	32.806	0.443679
62.4153	5.64672	51.5652	11.3608	32.7985	0.4599
62.4153	5.64669	51.23	11.376	32.769	0.424948
62.4153	5.64669	51.1452	11.3829	32.7656	0.4161
62.4153	5.64666	50.81	11.41	32.752	0.439402
62.4153	5.64666	50.7252	11.4552	32.7274	0.4453
62.4153	5.64663	50.39	11.634	32.63	0.509379
62.4153	5.64663	50.3052	11.6439	32.6041	0.5256
62.4153	5.6466	49.97	11.683	32.502	0.543076
62.4153	5.64658	49.55	11.696	32.491	0.564976
62.4153	5.64657	49.4672	11.6986	32.486	0.5694
62.4153	5.64655	49.14	11.709	32.466	0.528622
62.4153	5.64654	49.0552	11.7094	32.4636	0.5183
62.4153	5.64652	48.72	11.711	32.454	0.541602
62.4153	5.64651	48.6331	11.7108	32.4532	0.5475
62.4153	5.64649	48.29	11.71	32.45	0.570802
62.4153	5.64648	48.2052	11.71	32.4488	0.5767
62.4153	5.64646	47.87	11.71	32.444	0.570875
62.4153	5.64645	47.7831	11.7098	32.4436	0.5694
62.4153	5.64643	47.44	11.709	32.442	0.575225
62.4153	5.64642	47.3531	11.7098	32.441	0.5767
62.4153	5.6464	47.01	11.713	32.437	0.5767
62.4153	5.64639	46.9211	11.7138	32.4358	0.5767
62.4153	5.64637	46.57	11.717	32.431	0.553398
62.4153	5.64636	46.4831	11.7172	32.4308	0.5475
62.4153	5.64634	46.14	11.718	32.43	0.564976
62.4153	5.64631	45.71	11.717	32.43	0.586876
62.4153	5.6463	45.6252	11.7172	32.4302	0.5913
62.4153	5.64628	45.29	11.718	32.431	0.562173
62.4153	5.64627	45.2031	11.7186	32.4302	0.5548
62.4153	5.64625	44.86	11.721	32.427	0.560625
62.4153	5.64624	44.7752	11.721	32.4266	0.5621
62.4153	5.64622	44.44	11.721	32.425	0.573751
62.4153	5.64621	44.3572	11.7212	32.4246	0.5767
62.4153	5.64619	44.03	11.722	32.423	0.5767
62.4153	5.64618	43.941	11.7222	32.4232	0.5767
62.4153	5.64616	43.59	11.723	32.424	0.570882
62.4153	5.64615	43.5028	11.724	32.424	0.5694
62.4153	5.64613	43.16	11.728	32.424	0.5694
62.4153	5.64612	43.0731	11.729	32.424	0.5694
62.4153	5.6461	42.73	11.733	32.424	0.563575
62.4153	5.64609	42.6452	11.7334	32.4238	0.5621
62.4153	5.64607	42.31	11.735	32.423	0.553362
62.4153	5.64604	41.89	11.733	32.422	0.542412
62.4153	5.64603	41.8072	11.733	32.422	0.5402
62.4153	5.64601	41.48	11.733	32.422	0.546025
62.4153	5.646	41.3952	11.7326	32.422	0.5475
62.4153	5.64598	41.06	11.731	32.422	0.570802
62.4153	5.64597	40.9772	11.7314	32.4218	0.5767
62.4153	5.64595	40.65	11.733	32.421	0.588351
62.4153	5.64595	40.5631	11.733	32.421	0.5913
62.4153	5.64592	40.22	11.733	32.421	0.585475
62.4153	5.64592	40.1392	11.7326	32.421	0.584
62.4153	5.64589	39.82	11.731	32.421	0.578175
62.4153	5.64589	39.7331	11.732	32.4208	0.5767
62.4153	5.64586	39.39	11.736	32.42	0.553398
62.4153	5.64586	39.3071	11.7352	32.4198	0.5475
62.4153	5.64583	38.98	11.732	32.419	0.564954
62.4153	5.64583	38.8948	11.7316	32.4186	0.5694
62.4153	5.6458	38.56	11.73	32.417	0.578138
62.4153	5.64577	38.15	11.729	32.418	0.589088
62.4153	5.64577	38.0671	11.7292	32.418	0.5913
62.4153	5.64575	37.74	11.73	32.418	0.602936
62.4153	5.64574	37.6589	11.73	32.4178	0.6059
62.4153	5.64572	37.34	11.73	32.417	0.611725
62.4153	5.64571	37.2571	11.73	32.417	0.6132
62.4153	5.64569	36.93	11.73	32.417	0.595746
62.4153	5.64568	36.8489	11.7302	32.4168	0.5913
62.4153	5.64566	36.53	11.731	32.416	0.626252
62.4153	5.64565	36.4471	11.7308	32.4162	0.6351
62.4153	5.64563	36.12	11.73	32.417	0.617646
62.4153	5.64562	36.0368	11.7302	32.4166	0.6132
62.4153	5.6456	35.71	11.731	32.415	0.619018
62.4153	5.64559	35.6288	11.731	32.415	0.6205
62.4153	5.64557	35.31	11.731	32.415	0.591409
62.4153	5.64557	35.2308	11.7316	32.415	0.584
62.4153	5.64554	34.92	11.734	32.415	0.592727
62.4153	5.64551	34.52	11.733	32.414	0.603677
62.4153	5.64551	34.4368	11.7334	32.414	0.6059
62.4153	5.64548	34.11	11.735	32.414	0.611718
62.4153	5.64548	34.0288	11.7354	32.414	0.6132
62.4153	5.64546	33.71	11.737	32.414	0.619018
62.4153	5.64545	33.6288	11.7376	32.4132	0.6205
62.4153	5.64543	33.31	11.74	32.41	0.6205
62.4153	5.64542	33.2308	11.7412	32.41	0.6205
62.4153	5.6454	32.92	11.746	32.41	0.626318
62.4153	5.64539	32.8408	11.7468	32.41	0.6278
62.4153	5.64537	32.53	11.75	32.41	0.621982
62.4153	5.64536	32.4508	11.75	32.4096	0.6205
62.4153	5.64534	32.14	11.75	32.408	0.608864
62.4153	5.64533	32.0629	11.7504	32.408	0.6059
62.4153	5.64531	31.76	11.752	32.408	0.617536
62.4153	5.6453	31.6788	11.7534	32.4076	0.6205
62.4153	5.64528	31.36	11.759	32.406	0.6205
62.4153	5.64525	30.97	11.76	32.405	0.6205
62.4153	5.64525	30.8888	11.7594	32.405	0.6205
62.4153	5.64522	30.57	11.757	32.405	0.6205
62.4153	5.64522	30.4888	11.757	32.405	0.6205
62.4153	5.6452	30.17	11.757	32.405	0.608864
62.4153	5.64519	30.0868	11.757	32.405	0.6059
62.4153	5.64517	29.76	11.757	32.405	0.623354
62.4153	5.64516	29.6808	11.7574	32.405	0.6278
62.4153	5.64514	29.37	11.759	32.405	0.604528
62.4153	5.64513	29.2888	11.7592	32.405	0.5986
62.4153	5.64511	28.97	11.76	32.405	0.5986
62.4153	5.6451	28.8888	11.7606	32.4046	0.5986
62.4153	5.64508	28.57	11.763	32.403	0.621872
62.4153	5.64507	28.4888	11.7628	32.4028	0.6278
62.4153	5.64505	28.17	11.762	32.402	0.604528
62.4153	5.64505	28.0868	11.7622	32.4024	0.5986
62.4153	5.64502	27.76	11.763	32.404	0.5986
62.4153	5.64499	27.36	11.769	32.404	0.5986
62.4153	5.64499	27.2768	11.769	32.4036	0.5986
62.4153	5.64497	26.95	11.769	32.402	0.621872
62.4153	5.64496	26.8708	11.7686	32.4018	0.6278
62.4153	5.64494	26.56	11.767	32.401	0.59871
62.4153	5.64493	26.4808	11.7664	32.4014	0.5913
62.4153	5.64491	26.17	11.764	32.403	0.614572
62.4153	5.6449	26.0888	11.7666	32.4022	0.6205
62.4153	5.64488	25.77	11.777	32.399	0.603046
62.4153	5.64488	25.6888	11.7762	32.399	0.5986
62.4153	5.64485	25.37	11.773	32.399	0.592782
62.4153	5.64485	25.2888	11.7734	32.399	0.5913
62.4153	5.64482	24.97	11.775	32.399	0.5913
62.4153	5.64482	24.8949	11.7746	32.3988	0.5913
62.4153	5.6448	24.6	11.773	32.398	0.597118
62.4153	5.64479	24.5229	11.7728	32.3986	0.5986
62.4153	5.64477	24.22	11.772	32.401	0.589873
62.4153	5.64474	23.81	11.769	32.401	0.578923
62.4153	5.64473	23.7247	11.7682	32.4012	0.5767
62.4153	5.64471	23.39	11.765	32.402	0.599972
62.4153	5.64471	23.3027	11.7652	32.4018	0.6059
62.4153	5.64468	22.96	11.766	32.401	0.6059
62.4153	5.64468	22.8747	11.7666	32.401	0.6059
62.4153	5.64466	22.54	11.769	32.401	0.594264
62.4153	5.64465	22.4608	11.77	32.4012	0.5913
62.4153	5.64463	22.15	11.774	32.402	0.608754
62.4153	5.64462	22.0688	11.7758	32.401	0.6132
62.4153	5.6446	21.75	11.783	32.397	0.595746
62.4153	5.64459	21.6708	11.7832	32.397	0.5913
62.4153	5.64457	21.36	11.784	32.397	0.602936
62.4153	5.64457	21.2788	11.7852	32.3968	0.6059
62.4153	5.64454	20.96	11.79	32.396	0.6059
62.4153	5.64454	20.8808	11.7896	32.396	0.6059
62.4153	5.64452	20.57	11.788	32.396	0.608809
62.4153	5.64449	20.18	11.788	32.394	0.612459
62.4153	5.64448	20.1029	11.7872	32.3942	0.6132
62.4153	5.64446	19.8	11.784	32.395	0.589928
62.4153	5.64445	19.7208	11.7836	32.395	0.584
62.4153	5.64443	19.41	11.782	32.395	0.584
62.4153	5.64443	19.3288	11.7812	32.3952	0.584
62.4153	5.6444	19.01	11.778	32.396	0.589818
62.4153	5.6444	18.9288	11.7786	32.3962	0.5913
62.4153	5.64438	18.61	11.781	32.397	0.5913
62.4153	5.64437	18.5268	11.7816	32.397	0.5913
62.4153	5.64435	18.2	11.784	32.397	0.614572
62.4153	5.64434	18.1168	11.7862	32.3962	0.6205
62.4153	5.64432	17.79	11.795	32.393	0.603046
62.4153	5.64432	17.7088	11.7944	32.3928	0.5986
62.4153	5.64429	17.39	11.792	32.392	0.592782
62.4153	5.64429	17.3108	11.7918	32.392	0.5913
62.4153	5.64426	17	11.791	32.392	0.600027
62.4153	5.64424	16.6	11.792	32.393	0.610977
62.4153	5.64423	16.5188	11.7918	32.393	0.6132
62.4153	5.64421	16.2	11.791	32.393	0.578291
62.4153	5.6442	16.1168	11.7914	32.3928	0.5694
62.4153	5.64418	15.79	11.793	32.392	0.575218
62.4153	5.64418	15.7068	11.7952	32.3918	0.5767
62.4153	5.64415	15.38	11.804	32.391	0.582518
62.4153	5.64415	15.2988	11.8026	32.3906	0.584
62.4153	5.64412	14.98	11.797	32.389	0.589818
62.4153	5.64412	14.8988	11.7982	32.3892	0.5913
62.4153	5.6441	14.58	11.803	32.39	0.597118
62.4153	5.64409	14.4988	11.8034	32.39	0.5986
62.4153	5.64407	14.18	11.805	32.39	0.5986
62.4153	5.64406	14.0988	11.8042	32.3896	0.5986
62.4153	5.64404	13.78	11.801	32.388	0.586964
62.4153	5.64403	13.6947	11.8014	32.3884	0.584
62.4153	5.64401	13.36	11.803	32.39	0.595636
62.4153	5.64398	12.95	11.804	32.389	0.610236
62.4153	5.64398	12.8688	11.8038	32.389	0.6132
62.4153	5.64395	12.55	11.803	32.389	0.589928
62.4153	5.64395	12.4688	11.8024	32.3892	0.584
62.4153	5.64393	12.15	11.8	32.39	0.595636
62.4153	5.64392	12.0687	11.7998	32.3904	0.5986
62.4153	5.6439	11.75	11.799	32.392	0.592789
62.4153	5.64389	11.6664	11.8002	32.3916	0.5913
62.4153	5.64387	11.34	11.805	32.39	0.585482
62.4153	5.64386	11.2608	11.8056	32.3896	0.584
62.4153	5.64384	10.95	11.808	32.388	0.601454
62.4153	5.64383	10.8729	11.8076	32.388	0.6059
62.4153	5.64381	10.57	11.806	32.388	0.600082
62.4153	5.64381	10.4929	11.8056	32.3882	0.5986
62.4153	5.64378	10.19	11.804	32.389	0.586964
62.4153	5.64378	10.1108	11.804	32.389	0.584
62.4153	5.64376	9.8	11.804	32.389	0.584
62.4153	5.64373	9.39	11.805	32.388	0.584
62.4153	5.64372	9.31083	11.8058	32.388	0.584
62.4153	5.6437	9	11.809	32.388	0.566546
62.4153	5.6437	8.92286	11.809	32.3878	0.5621
62.4153	5.64367	8.62	11.809	32.387	0.544646
62.4153	5.64367	8.54286	11.8092	32.3872	0.5402
62.4153	5.64365	8.24	11.81	32.388	0.5402
62.4153	5.64364	8.16481	11.8096	32.3878	0.5402
62.4153	5.64362	7.87	11.808	32.387	0.546011
62.4153	5.64361	7.78441	11.8076	32.3874	0.5475
62.4153	5.64359	7.45	11.806	32.389	0.524228
62.4153	5.64359	7.36669	11.8054	32.389	0.5183
62.4153	5.64356	7.04	11.803	32.389	0.495057
62.4153	5.64356	6.95432	11.8036	32.3886	0.4891
62.4153	5.64353	6.62	11.806	32.387	0.494911
62.4153	5.64353	6.54044	11.8062	32.3872	0.4964
62.4153	5.64351	6.23	11.807	32.388	0.493495
62.4153	5.64348	5.83	11.806	32.388	0.489845
62.4153	5.64347	5.74432	11.8062	32.3882	0.4891
62.4153	5.64345	5.41	11.807	32.389	0.477478
62.4153	5.64345	5.32432	11.807	32.389	0.4745
62.4153	5.64342	4.99	11.807	32.389	0.457068
62.4153	5.64342	4.90024	11.8072	32.3888	0.4526
62.4153	5.6434	4.55	11.808	32.388	0.411924
62.4153	5.64339	4.46432	11.8078	32.3878	0.4015
62.4153	5.64337	4.13	11.807	32.387	0.407311
62.4153	5.64336	4.04636	11.8074	32.3872	0.4088
62.4153	5.64334	3.72	11.809	32.388	0.385557
62.4153	5.64333	3.63636	11.809	32.3882	0.3796
62.4153	5.64331	3.31	11.809	32.389	0.3796
62.4153	5.6433	3.2284	11.8088	32.3888	0.3796
62.4153	5.64328	2.91	11.808	32.388	0.373789
62.4153	5.64327	2.83044	11.808	32.3878	0.3723
62.4153	5.64325	2.52	11.808	32.387	0.369395
62.4153	5.64322	2.07	11.808	32.387	0.365745
62.4153	5.64322	1.98636	11.8082	32.387	0.365
62.4153	5.64319	1.66	11.809	32.387	0.335946
62.4153	5.64319	1.57228	11.809	32.387	0.3285
62.4153	5.64317	1.23	11.809	32.387	0.322689
62.4153	5.64316	1.18308	11.809	32.387	0.3212
62.4153	5.64314	1	11.809	32.387	0.338632
62.4153	5.64313	0.926633	11.8088	32.3872	0.3431
62.4153	5.64311	0.64	11.808	32.388	0.337282
62.4153	5.64311	0.597327	11.808	32.388	0.3358
62.4153	5.64309	0.43	11.808	32.388	0.324178
62.4153	5.64308	0.38512	11.808	32.3878	0.3212
62.4153	5.64306	0.21	11.808	32.387	0.3212
62.4153	5.64305	0.21612	11.808	32.3872	0.3212
62.4153	5.64303	0.24	11.808	32.388	0.3212
62.4153	5.64302	0.25836	11.808	32.3878	0.3212
62.4153	5.64301	0.33	11.808	32.387	0.3212
62.4153	5.64299	0.3	11.808	32.387	0.3212
62.4153	5.64288	0.33672	11.8078	32.3872	0.3212
62.4155	5.64245	0.48	11.807	32.388	0.3212
62.4155	5.64245	0.50856	11.8072	32.388	0.3212
62.4155	5.64244	0.62	11.808	32.388	0.327011
62.4155	5.64243	0.64856	11.808	32.3878	0.3285
62.4155	5.6424	0.76	11.808	32.387	0.311068
62.4155	5.64239	0.811	11.808	32.3874	0.3066
62.4155	5.64234	1.01	11.808	32.389	0.329843
62.4155	5.64234	1.05488	11.808	32.3888	0.3358
62.4155	5.64233	1.23	11.808	32.388	0.353232
62.4155	5.64232	1.25448	11.808	32.388	0.3577
62.4155	5.64231	1.35	11.808	32.388	0.340268
62.4155	5.64231	1.3908	11.808	32.3878	0.3358
62.4155	5.64229	1.55	11.808	32.387	0.347422
62.4155	5.64229	1.601	11.808	32.387	0.3504
62.4155	5.64228	1.8	11.808	32.387	0.347495
62.4154	5.64228	2.01	11.807	32.388	0.343845
62.4154	5.64228	2.06304	11.807	32.3876	0.3431
62.4154	5.64227	2.27	11.807	32.386	0.348911
62.4154	5.64226	2.33324	11.807	32.3866	0.3504
62.4154	5.64225	2.58	11.807	32.389	0.367832
62.4154	5.64225	2.6412	11.8068	32.3888	0.3723
62.4154	5.64224	2.88	11.806	32.388	0.3723
62.4154	5.64224	2.94528	11.8058	32.388	0.3723
62.4154	5.64223	3.2	11.805	32.388	0.3723
62.4154	5.64223	3.2612	11.8052	32.388	0.3723
62.4154	5.64222	3.5	11.806	32.388	0.395543
62.4154	5.64222	3.56528	11.8046	32.3882	0.4015
62.4154	5.64221	3.82	11.799	32.389	0.413122
62.4154	5.64221	3.88936	11.799	32.3892	0.4161
62.4154	5.6422	4.16	11.799	32.39	0.404478
62.4154	5.64219	4.2314	11.8	32.3902	0.4015
62.4154	5.64218	4.51	11.804	32.391	0.407311
62.4153	5.64217	4.86	11.803	32.388	0.414611
62.4153	5.64216	4.93351	11.8038	32.3884	0.4161
62.4153	5.64214	5.22	11.807	32.39	0.439314
62.4153	5.64214	5.30192	11.8072	32.3896	0.4453
62.4153	5.64212	5.62	11.808	32.388	0.456922
62.4153	5.64212	5.6914	11.808	32.3882	0.4599
62.4153	5.6421	5.97	11.808	32.389	0.477332
62.4153	5.6421	6.00676	11.8078	32.3888	0.4818
62.4153	5.64208	6.15	11.807	32.388	0.470193
62.4153	5.64207	6.1459	11.8066	32.388	0.4672
62.4153	5.64205	6.13	11.805	32.388	0.507876
62.4153	5.64205	6.08916	11.8044	32.3884	0.5183
62.4153	5.64203	5.93	11.802	32.39	0.495086
62.4153	5.64202	5.86447	11.801	32.3896	0.4891
62.4153	5.642	5.61	11.797	32.388	0.460046
62.4153	5.64199	5.54261	11.798	32.3884	0.4526
62.4153	5.64196	5.28	11.802	32.39	0.4526
62.4153	5.64194	4.93	11.804	32.389	0.4526
62.4153	5.64193	4.8317	11.805	32.389	0.4526
62.4153	5.64191	4.45	11.809	32.389	0.435168
62.4153	5.6419	4.35402	11.8088	32.3886	0.4307
62.4153	5.64188	3.98	11.808	32.387	0.424897
62.4153	5.64187	3.89399	11.8078	32.3872	0.4234
62.4153	5.64184	3.56	11.807	32.388	0.411778
62.4153	5.64184	3.47832	11.8072	32.3878	0.4088
62.4153	5.64182	3.16	11.808	32.387	0.385586
62.4153	5.64181	3.08218	11.808	32.3872	0.3796
62.4153	5.64179	2.78	11.808	32.388	0.373789
62.4153	5.64178	2.70044	11.808	32.388	0.3723
62.4153	5.64176	2.39	11.808	32.388	0.3723
62.4153	5.64176	2.32057	11.8076	32.388	0.3723
62.4153	5.64174	2.05	11.806	32.388	0.378103
62.4153	5.64173	1.98235	11.806	32.3882	0.3796
62.4153	5.64171	1.72	11.806	32.389	0.370895
62.4153	5.64168	1.37	11.805	32.389	0.359945
62.4153	5.64168	1.30235	11.805	32.3892	0.3577
62.4153	5.64166	1.04	11.805	32.39	0.346093
62.4153	5.64165	0.976513	11.8048	32.3896	0.3431
62.4153	5.64164	0.73	11.804	32.388	0.319857
62.4153	5.64163	0.68104	11.804	32.3884	0.3139
62.4153	5.64162	0.49	11.804	32.39	0.331332
62.4153	5.64161	0.44308	11.8042	32.3898	0.3358
62.4153	5.6416	0.26	11.805	32.389	0.3358
62.4153	5.64159	0.22532	11.805	32.3888	0.3358
62.4153	5.64159	0.09	11.805	32.388	0.324178
62.4153	5.64158	0.102252	11.7836	29.8838	0.3212
62.4153	5.64158	0.15	11.7	20.125	0.338611
62.4153	5.64158	0.147952	11.7215	20.733	0.3431
62.4153	5.64158	0.14	11.805	23.094	0.337289
62.4153	5.64158	0.12368	11.805	24.9741	0.3358
62.4153	5.64158	0.06	11.805	32.31	0.341611
62.4154	5.6416	0.08	11.771	32.316	0.348896
62.4154	5.6416	0.0779441	11.7766	27.8512	0.3504
62.4154	5.64159	0.07	11.798	10.599	0.338778
62.4154	5.64159	0.06184	11.7982	14.9734	0.3358
62.4154	5.64159	0.03	11.799	32.042	0.341611
62.4154	5.64159	0.0606306	11.7972	28.4186	0.3431
62.4154	5.64159	0.18	11.79	14.298	0.319886
62.4154	5.64159	0.177952	11.7931	17.7879	0.3139
62.4154	5.6416	0.17	11.805	31.339	0.348765
62.4154	5.6416	0.15572	11.8052	31.5202	0.3577
62.4154	5.6416	0.1	11.806	32.227	0.334457
62.4154	5.6416	0.0918318	11.8029	32.2501	0.3285
62.4154	5.64159	0.06	11.791	32.34	0.363321
62.4154	5.64159	0.07025	11.7918	27.2437	0.3723
62.4154	5.64158	0.11	11.795	7.48	0.331676
62.4154	5.64159	0.0956643	11.797	12.579	0.3212
62.4154	5.64159	0.04	11.805	32.378	0.324105
62.4154	5.6416	0.11	11.803	32.316	0.327755
62.4154	5.6416	0.10592	11.8026	32.3307	0.3285
62.4154	5.6416	0.09	11.801	32.388	0.363365
62.4154	5.6416	0.08592	11.8004	32.3878	0.3723
62.4154	5.64159	0.07	11.798	32.387	0.366489
62.4154	5.64159	0.07	11.7947	31.1797	0.365
62.4154	5.6416	0.07	11.782	26.475	0.341786
62.4154	5.64159	0.06795	11.7836	27.6134	0.3358
62.4154	5.64159	0.06	11.79	32.028	0.388031
62.4154	5.64159	0.062048	11.7916	27.0314	0.4015
62.4154	5.64159	0.07	11.798	7.63	0.366635
62.4154	5.64159	0.067958	11.7976	12.6843	0.3577
62.4154	5.6416	0.06	11.796	32.381	0.346093
62.4154	5.6416	0.0682082	11.7966	27.4097	0.3431
62.4154	5.6416	0.1	11.799	8.155	0.366285
62.4154	5.6416	0.0876523	11.8002	13.0811	0.3723
62.4154	5.6416	0.04	11.805	32.092	0.3723
62.4154	5.6416	0.05	11.805	32.015	0.3723
62.4154	5.6416	0.05	11.8015	28.7533	0.3723
62.4154	5.64161	0.05	11.788	16.12	0.383892
62.4154	5.64161	0.0520579	11.7915	19.3174	0.3869
62.4154	5.6416	0.06	11.805	31.657	0.404311
62.4154	5.6416	0.05795	11.805	31.7991	0.4088
62.4154	5.6416	0.05	11.805	32.35	0.397193
62.4154	5.6416	0.0459041	11.8046	32.3578	0.3942
62.4154	5.64161	0.03	11.803	32.388	0.370957
62.4154	5.64161	0.0361261	11.8028	30.0944	0.365
62.4154	5.64161	0.06	11.802	21.156	0.411428
62.4154	5.64161	0.057952	11.8024	23.4401	0.4234
62.4154	5.6416	0.05	11.804	32.309	0.405968
62.4154	5.6416	0.0642943	11.803	32.2788	0.4015
62.4154	5.6416	0.12	11.799	32.161	0.407304
62.4154	5.6416	0.1036	11.8002	32.2006	0.4088
62.4154	5.64161	0.04	11.805	32.354	0.405898
62.4154	5.64161	0.08	11.805	32.382	0.402248
62.4154	5.64161	0.0718	11.8052	32.3816	0.4015
62.4154	5.64162	0.04	11.806	32.38	0.389893
62.4154	5.64162	0.06255	11.8033	30.8228	0.3869
62.4154	5.64161	0.15	11.793	24.784	0.375293
62.4154	5.64161	0.13565	11.7955	26.341	0.3723
62.4154	5.64161	0.08	11.805	32.379	0.401318
62.4154	5.64161	0.0718082	11.8048	32.3761	0.4088
62.4154	5.64161	0.04	11.804	32.365	0.344881
62.4154	5.64161	0.0440882	11.7975	28.1928	0.3285
62.4154	5.64162	0.06	11.772	11.954	0.340092
62.4154	5.64162	0.0579441	11.7776	16.067	0.3431
62.4154	5.64162	0.05	11.799	31.96	0.354722
62.4154	5.64162	0.0581682	11.7994	32.0409	0.3577
62.4154	5.64161	0.09	11.801	32.356	0.328683
62.4154	5.6416	0.10845	11.8014	32.3585	0.3212
62.4154	5.64158	0.18	11.803	32.368	0.327004
62.4154	5.64156	0.23	11.803	32.387	0.334303
62.4154	5.64156	0.23	11.8034	32.3874	0.3358
62.4154	5.64154	0.23	11.805	32.389	0.3358
62.4154	5.64154	0.25665	11.8052	32.389	0.3358
62.4154	5.64152	0.36	11.806	32.389	0.3358
62.4154	5.64151	0.3846	11.8056	32.389	0.3358
62.4154	5.6415	0.48	11.804	32.389	0.329997
62.4154	5.64149	0.533247	11.8042	32.3888	0.3285
62.4154	5.64148	0.74	11.805	32.388	0.334311
62.4154	5.64148	0.8012	11.805	32.388	0.3358
62.4154	5.64146	1.04	11.805	32.388	0.347422
62.4154	5.64146	1.14414	11.8052	32.388	0.3504
62.4154	5.64145	1.55	11.806	32.388	0.338793
62.4154	5.64145	1.63815	11.806	32.3882	0.3358
62.4155	5.64145	1.98	11.806	32.389	0.347407
62.4155	5.64145	2.07225	11.8062	32.3888	0.3504
62.4155	5.64145	2.43	11.807	32.388	0.359105
62.4155	5.64146	2.84	11.808	32.388	0.370055
62.4155	5.64147	2.9261	11.8078	32.388	0.3723
62.4155	5.64149	3.26	11.807	32.388	0.412925
62.4155	5.6415	3.36455	11.807	32.3882	0.4234
62.4155	5.64152	3.77	11.807	32.389	0.417596
62.4155	5.64153	3.8889	11.807	32.3888	0.4161
62.4155	5.64155	4.35	11.807	32.388	0.445118
62.4155	5.64156	4.4607	11.8064	32.3882	0.4526
62.4155	5.64158	4.89	11.804	32.389	0.470011
62.4155	5.64158	4.9843	11.8044	32.389	0.4745
62.4155	5.6416	5.35	11.806	32.389	0.480303
62.4156	5.6416	5.44421	11.8058	32.389	0.4818
62.4156	5.64161	5.81	11.805	32.389	0.505043
62.4156	5.64161	5.89781	11.805	32.389	0.511
62.4156	5.64162	6.24	11.805	32.389	0.522607
62.4156	5.64162	6.32815	11.8054	32.3888	0.5256
62.4156	5.64163	6.67	11.807	32.388	0.519797
62.4156	5.64163	7.15	11.807	32.389	0.512496
62.4156	5.64163	7.25455	11.8062	32.3888	0.511
62.4156	5.64163	7.66	11.803	32.388	0.540018
62.4156	5.64163	7.76649	11.8034	32.3884	0.5475
62.4156	5.64162	8.18	11.805	32.39	0.5475
62.4157	5.64162	8.29027	11.805	32.3898	0.5475
62.4157	5.64162	8.72	11.805	32.389	0.570714
62.4157	5.64162	8.83275	11.8042	32.3882	0.5767
62.4157	5.64161	9.27	11.801	32.385	0.59411
62.4157	5.64161	9.3848	11.801	32.386	0.5986
62.4157	5.64161	9.83	11.801	32.39	0.581189
62.4157	5.64161	9.94275	11.8008	32.3904	0.5767
62.4157	5.64161	10.38	11.8	32.392	0.588307
62.4157	5.64161	10.4948	11.8002	32.3918	0.5913
62.4157	5.64161	10.94	11.801	32.391	0.562282
62.4157	5.64161	11.0466	11.8004	32.3912	0.5548
62.4158	5.64161	11.46	11.798	32.392	0.557702
62.4158	5.64161	11.94	11.801	32.392	0.561352
62.4158	5.64162	12.0466	11.802	32.3914	0.5621
62.4158	5.64162	12.46	11.806	32.389	0.57951
62.4158	5.64162	12.5625	11.806	32.389	0.584
62.4158	5.64162	12.96	11.806	32.389	0.572393
62.4158	5.64162	13.0666	11.8056	32.389	0.5694
62.4158	5.64162	13.48	11.804	32.389	0.5694
62.4158	5.64162	13.5825	11.804	32.3892	0.5694
62.4159	5.64163	13.98	11.804	32.39	0.575203
62.4159	5.64163	14.0805	11.804	32.39	0.5767
62.4159	5.64163	14.47	11.804	32.39	0.582503
62.4159	5.64163	14.5684	11.804	32.39	0.584
62.4159	5.64162	14.95	11.804	32.39	0.578196
62.4159	5.64162	15.0504	11.8042	32.39	0.5767
62.4159	5.64162	15.44	11.805	32.39	0.570897
62.4159	5.64162	15.5364	11.8052	32.3898	0.5694
62.4159	5.64162	15.91	11.806	32.389	0.578105
62.4159	5.64162	16.36	11.803	32.39	0.589055
62.4159	5.64162	16.4543	11.8028	32.3896	0.5913
62.416	5.64162	16.82	11.802	32.388	0.57389
62.416	5.64162	16.9184	11.8012	32.3886	0.5694
62.416	5.64162	17.3	11.798	32.391	0.575203
62.416	5.64162	17.3964	11.7976	32.3912	0.5767
62.416	5.64162	17.77	11.796	32.392	0.5767
62.416	5.64162	17.8684	11.7962	32.3922	0.5767
62.416	5.64162	18.25	11.797	32.393	0.582503
62.416	5.64162	18.3443	11.7964	32.3928	0.584
62.416	5.64162	18.71	11.794	32.392	0.572393
62.416	5.64162	18.8043	11.7938	32.3922	0.5694
62.416	5.64162	19.17	11.793	32.393	0.581007
62.416	5.64162	19.2663	11.7928	32.393	0.584
62.416	5.64163	19.64	11.792	32.393	0.589804
62.4161	5.64163	19.7281	11.7918	32.3932	0.5913
62.4161	5.64163	20.07	11.791	32.394	0.585496
62.4161	5.64163	20.5	11.791	32.394	0.578196
62.4161	5.64163	20.5881	11.7894	32.394	0.5767
62.4161	5.64163	20.93	11.783	32.394	0.582503
62.4161	5.64163	21.0181	11.7838	32.3942	0.584
62.4161	5.64163	21.36	11.787	32.395	0.60141
62.4161	5.64163	21.4461	11.7862	32.3952	0.6059
62.4161	5.64163	21.78	11.783	32.396	0.594293
62.4161	5.64163	21.8681	11.7836	32.3956	0.5913
62.4161	5.64163	22.21	11.786	32.394	0.5913
62.4161	5.64163	22.3023	11.7854	32.3946	0.5913
62.4162	5.64163	22.66	11.783	32.397	0.608711
62.4162	5.64163	22.7441	11.782	32.3972	0.6132
62.4162	5.64163	23.07	11.778	32.398	0.589986
62.4162	5.64163	23.1581	11.7784	32.398	0.584
62.4162	5.64163	23.5	11.78	32.398	0.607214
62.4162	5.64163	23.5902	11.78	32.398	0.6132
62.4162	5.64163	23.94	11.78	32.398	0.607396
62.4162	5.64163	24.36	11.779	32.398	0.600096
62.4162	5.64163	24.4441	11.7782	32.3982	0.5986
62.4162	5.64163	24.77	11.775	32.399	0.5986
62.4162	5.64163	24.852	11.7748	32.3992	0.5986
62.4162	5.64163	25.17	11.774	32.4	0.610207
62.4162	5.64163	25.252	11.774	32.4	0.6132
62.4163	5.64163	25.57	11.774	32.4	0.607396
62.4163	5.64163	25.65	11.773	32.4002	0.6059
62.4163	5.64163	25.96	11.769	32.401	0.594293
62.4163	5.64163	26.042	11.7684	32.4012	0.5913
62.4163	5.64163	26.36	11.766	32.402	0.631925
62.4163	5.64163	26.442	11.7662	32.4022	0.6424
62.4163	5.64163	26.76	11.767	32.403	0.619186
62.4163	5.64163	26.844	11.7664	32.403	0.6132
62.4163	5.64163	27.17	11.764	32.403	0.607396
62.4163	5.64163	27.2561	11.7638	32.4032	0.6059
62.4163	5.64163	27.59	11.763	32.404	0.602998
62.4163	5.64163	27.97	11.762	32.404	0.599348
62.4163	5.64163	28.052	11.762	32.4042	0.5986
62.4164	5.64163	28.37	11.762	32.405	0.5986
62.4164	5.64163	28.4479	11.761	32.405	0.5986
62.4164	5.64163	28.75	11.757	32.405	0.610207
62.4164	5.64163	28.83	11.7556	32.4052	0.6132
62.4164	5.64163	29.14	11.75	32.406	0.619004
62.4164	5.64163	29.22	11.7521	32.4068	0.6205
62.4164	5.64163	29.53	11.76	32.41	0.614697
62.4164	5.64163	29.612	11.7598	32.4094	0.6132
62.4164	5.64163	29.93	11.759	32.407	0.601593
62.4164	5.64163	30.012	11.758	32.4068	0.5986
62.4164	5.64163	30.33	11.754	32.406	0.610207
62.4164	5.64163	30.4099	11.7524	32.4064	0.6132
62.4164	5.64163	30.72	11.746	32.408	0.619004
62.4164	5.64163	30.7959	11.7456	32.4084	0.6205
62.4165	5.64163	31.09	11.744	32.41	0.617598
62.4165	5.64163	31.47	11.744	32.411	0.613948
62.4165	5.64163	31.5479	11.7438	32.4112	0.6132
62.4165	5.64163	31.85	11.743	32.412	0.619004
62.4165	5.64163	31.9279	11.7428	32.412	0.6205
62.4165	5.64163	32.23	11.742	32.412	0.6205
62.4165	5.64163	32.31	11.742	32.412	0.6205
62.4165	5.64163	32.62	11.742	32.412	0.614697
62.4165	5.64163	32.6959	11.7418	32.4122	0.6132
62.4165	5.64163	32.99	11.741	32.413	0.630611
62.4165	5.64163	33.0679	11.7408	32.413	0.6351
62.4165	5.64163	33.37	11.74	32.413	0.611886
62.4165	5.64163	33.45	11.7406	32.4126	0.6059
62.4166	5.64163	33.76	11.743	32.411	0.617507
62.4166	5.64163	33.84	11.7434	32.411	0.6205
62.4166	5.64163	34.15	11.745	32.411	0.614697
62.4166	5.64163	34.2279	11.745	32.4114	0.6132
62.4166	5.64164	34.53	11.745	32.413	0.604495
62.4166	5.64164	34.9	11.741	32.412	0.593545
62.4166	5.64164	34.9779	11.7406	32.4124	0.5913
62.4166	5.64164	35.28	11.739	32.414	0.5913
62.4166	5.64164	35.3579	11.739	32.414	0.5913
62.4166	5.64164	35.66	11.739	32.414	0.597103
62.4166	5.64164	35.7379	11.739	32.414	0.5986
62.4166	5.64164	36.04	11.739	32.414	0.621814
62.4166	5.64164	36.1179	11.7386	32.4144	0.6278
62.4166	5.64164	36.42	11.737	32.416	0.616193
62.4166	5.64164	36.4979	11.7368	32.4158	0.6132
62.4167	5.64164	36.8	11.736	32.415	0.59579
62.4167	5.64164	36.8738	11.736	32.415	0.5913
62.4167	5.64163	37.16	11.736	32.415	0.608711
62.4167	5.64163	37.2358	11.7356	32.4154	0.6132
62.4167	5.64163	37.53	11.734	32.417	0.636414
62.4167	5.64163	37.6079	11.734	32.417	0.6424
62.4167	5.64163	37.91	11.734	32.417	0.627891
62.4167	5.64163	38.28	11.733	32.417	0.609641
62.4167	5.64163	38.3579	11.7328	32.4168	0.6059
62.4167	5.64163	38.66	11.732	32.416	0.611704
62.4167	5.64163	38.7339	11.7314	32.4166	0.6132
62.4167	5.64163	39.02	11.729	32.419	0.595811
62.4167	5.64163	39.092	11.7288	32.4192	0.5913
62.4168	5.64163	39.37	11.728	32.42	0.597103
62.4168	5.64163	39.4438	11.7276	32.4204	0.5986
62.4168	5.64163	39.73	11.726	32.422	0.592797
62.4168	5.64163	39.8017	11.726	32.4224	0.5913
62.4168	5.64163	40.08	11.726	32.424	0.585496
62.4168	5.64163	40.1559	11.726	32.4242	0.584
62.4168	5.64163	40.45	11.726	32.425	0.589804
62.4168	5.64163	40.5238	11.726	32.4246	0.5913
62.4168	5.64163	40.81	11.726	32.423	0.57389
62.4168	5.64163	40.8818	11.7256	32.423	0.5694
62.4168	5.64163	41.16	11.724	32.423	0.572298
62.4168	5.64163	41.52	11.723	32.425	0.575952
62.4168	5.64163	41.5917	11.723	32.4248	0.5767
62.4169	5.64163	41.87	11.723	32.424	0.605718
62.4169	5.64163	41.9397	11.723	32.424	0.6132
62.4169	5.64163	42.21	11.723	32.424	0.589986
62.4169	5.64163	42.2818	11.7228	32.4244	0.584
62.4169	5.64163	42.56	11.722	32.426	0.595607
62.4169	5.64163	42.6277	11.7218	32.4262	0.5986
62.4169	5.64163	42.89	11.721	32.427	0.575386
62.4169	5.64163	42.9597	11.7204	32.4272	0.5694
62.4169	5.64163	43.23	11.718	32.428	0.581007
62.4169	5.64163	43.3017	11.7174	32.4282	0.584
62.4169	5.64163	43.58	11.715	32.429	0.578196
62.4169	5.64163	43.6517	11.7144	32.4298	0.5767
62.4169	5.64163	43.93	11.712	32.433	0.570897
62.4169	5.64163	43.9997	11.712	32.433	0.5694
62.417	5.64163	44.27	11.712	32.433	0.5694
62.417	5.64163	44.61	11.711	32.433	0.5694
62.417	5.64163	44.6821	11.7102	32.433	0.5694
62.417	5.64163	44.96	11.707	32.433	0.586789
62.417	5.64163	45.03	11.707	32.4332	0.5913
62.417	5.64163	45.3	11.707	32.434	0.602892
62.417	5.64163	45.372	11.7062	32.434	0.6059
62.417	5.64163	45.65	11.703	32.434	0.582686
62.417	5.64163	45.7198	11.7032	32.434	0.5767
62.417	5.64163	45.99	11.704	32.434	0.594089
62.417	5.64163	46.06	11.7036	32.4342	0.5986
62.417	5.64163	46.33	11.702	32.435	0.5986
62.417	5.64163	46.402	11.7016	32.435	0.5986
62.417	5.64163	46.68	11.7	32.435	0.575386
62.4171	5.64163	46.7518	11.7006	32.435	0.5694
62.4171	5.64163	47.03	11.703	32.435	0.592585
62.4171	5.64163	47.1042	11.702	32.435	0.5986
62.4171	5.64163	47.39	11.698	32.435	0.601498
62.4171	5.64163	47.73	11.696	32.438	0.605148
62.4171	5.64163	47.8	11.6956	32.4378	0.6059
62.4171	5.64163	48.07	11.694	32.437	0.600104
62.4171	5.64163	48.14	11.694	32.4391	0.5986
62.4171	5.64163	48.41	11.694	32.447	0.604396
62.4171	5.64163	48.48	11.694	32.448	0.6059
62.4171	5.64163	48.75	11.694	32.452	0.576919
62.4171	5.64163	48.818	11.6938	32.4528	0.5694
62.4171	5.64163	49.08	11.693	32.456	0.575196
62.4171	5.64163	49.15	11.6928	32.4562	0.5767
62.4172	5.64163	49.42	11.692	32.457	0.594089
62.4172	5.64163	49.4921	11.6912	32.4586	0.5986
62.4172	5.64163	49.77	11.688	32.465	0.5986
62.4172	5.64163	49.84	11.6878	32.4664	0.5986
62.4172	5.64164	50.11	11.687	32.472	0.569619
62.4172	5.64164	50.18	11.68	32.4759	0.5621
62.4172	5.64164	50.45	11.653	32.491	0.559202
62.4172	5.64164	50.79	11.6	32.548	0.555552
62.4172	5.64164	50.86	11.5687	32.5602	0.5548
62.4172	5.64164	51.13	11.448	32.607	0.473653
62.4172	5.64164	51.2	11.4272	32.6334	0.4526
62.4172	5.64164	51.47	11.347	32.735	0.435211
62.4172	5.64164	51.538	11.3332	32.7507	0.4307
62.4172	5.64164	51.8	11.28	32.811	0.413311
62.4173	5.64164	51.868	11.2505	32.8211	0.4088
62.4173	5.64164	52.13	11.137	32.86	0.374023
62.4173	5.64164	52.198	11.1121	32.8849	0.365
62.4173	5.64165	52.46	11.016	32.981	0.341815
62.4173	5.64165	52.528	11.0024	32.9897	0.3358
62.4173	5.64165	52.79	10.95	33.023	0.3358
62.4173	5.64165	52.86	10.9337	33.0317	0.3358
62.4173	5.64165	53.13	10.871	33.065	0.330004
62.4173	5.64165	53.2	10.8646	33.0728	0.3285
62.4173	5.64165	53.47	10.84	33.103	0.331398
62.4173	5.64166	53.79	10.814	33.115	0.335048
62.4173	5.64166	53.8621	10.814	33.116	0.3358
62.4173	5.64166	54.14	10.814	33.12	0.324208
62.4173	5.64166	54.208	10.7893	33.1212	0.3212
62.4173	5.64166	54.47	10.694	33.126	0.309608
62.4174	5.64166	54.5421	10.675	33.1441	0.3066
62.4174	5.64166	54.82	10.602	33.214	0.312396
62.4174	5.64166	54.888	10.5909	33.2222	0.3139
62.4174	5.64166	55.15	10.548	33.254	0.296511
62.4174	5.64166	55.22	10.5447	33.2571	0.292
62.4174	5.64166	55.49	10.532	33.269	0.309389
62.4174	5.64166	55.558	10.5211	33.2717	0.3139
62.4174	5.64166	55.82	10.479	33.282	0.26753
62.4174	5.64166	55.888	10.4763	33.2863	0.2555
62.4174	5.64166	56.15	10.466	33.303	0.272889
62.4174	5.64166	56.218	10.4573	33.3044	0.2774
62.4174	5.64165	56.48	10.424	33.31	0.280298
62.4174	5.64165	56.81	10.369	33.337	0.283948
62.4174	5.64165	56.878	10.3552	33.3421	0.2847
62.4174	5.64166	57.14	10.302	33.362	0.290496
62.4175	5.64166	57.2059	10.2966	33.3665	0.292
62.4175	5.64166	57.46	10.276	33.384	0.309389
62.4175	5.64166	57.5259	10.2737	33.3854	0.3139
62.4175	5.64166	57.78	10.265	33.391	0.290715
62.4175	5.64166	57.848	10.2561	33.392	0.2847
62.4175	5.64166	58.11	10.222	33.396	0.267311
62.4175	5.64166	58.1759	10.2061	33.404	0.2628
62.4175	5.64166	58.43	10.145	33.435	0.274392
62.4175	5.64166	58.4959	10.1351	33.4383	0.2774
62.4175	5.64166	58.75	10.097	33.451	0.271604
62.4175	5.64166	58.8097	10.0748	33.4607	0.2701
62.4175	5.64166	59.04	9.989	33.498	0.281692
62.4175	5.64166	59.0853	9.98406	33.5027	0.2847
62.4175	5.64166	59.26	9.965	33.521	0.2847
62.4176	5.64166	59.41	9.944	33.525	0.2847
62.4176	5.64166	59.4306	9.93967	33.5279	0.2847
62.4176	5.64166	59.51	9.923	33.539	0.2847
62.4176	5.64166	59.4997	9.92197	33.5398	0.2847
62.4176	5.64166	59.46	9.918	33.543	0.2847
62.4176	5.64166	59.4147	9.92088	33.543	0.2847
62.4176	5.64166	59.24	9.932	33.543	0.296292
62.4176	5.64166	59.1741	9.93962	33.5403	0.2993
62.4176	5.64166	58.92	9.969	33.53	0.276115
62.4176	5.64166	58.8417	9.98692	33.5267	0.2701
62.4176	5.64166	58.54	10.056	33.514	0.2701
62.4176	5.64166	58.4555	10.0735	33.5025	0.2701
62.4176	5.64166	58.13	10.141	33.458	0.293285
62.4176	5.64166	58.0414	10.1509	33.4547	0.2993
62.4176	5.64166	57.7	10.189	33.442	0.293504
62.4177	5.64166	57.6094	10.2094	33.434	0.292
62.4177	5.64166	57.26	10.288	33.403	0.289102
62.4177	5.64166	56.83	10.328	33.374	0.285452
62.4177	5.64166	56.7414	10.3447	33.3699	0.2847
62.4177	5.64166	56.4	10.409	33.354	0.278904
62.4177	5.64166	56.3114	10.4242	33.346	0.2774
62.4177	5.64166	55.97	10.483	33.315	0.288992
62.4177	5.64166	55.8794	10.497	33.308	0.292
62.4177	5.64166	55.53	10.551	33.281	0.292
62.4177	5.64166	55.4394	10.5615	33.2758	0.292
62.4177	5.64166	55.09	10.602	33.256	0.303592
62.4177	5.64166	55.0014	10.6144	33.2494	0.3066
62.4177	5.64166	54.66	10.662	33.224	0.3066
62.4177	5.64166	54.5694	10.6744	33.2174	0.3066
62.4178	5.64166	54.22	10.722	33.192	0.300804
62.4178	5.64166	54.1294	10.7403	33.1817	0.2993
62.4178	5.64167	53.78	10.811	33.142	0.34567
62.4178	5.64166	53.6935	10.8186	33.1354	0.3577
62.4178	5.64166	53.36	10.848	33.11	0.349006
62.4178	5.64166	52.94	10.974	33.097	0.338056
62.4178	5.64166	52.8555	10.9812	33.0766	0.3358
62.4178	5.64166	52.53	11.009	32.998	0.364744
62.4178	5.64166	52.4411	11.0202	32.9997	0.3723
62.4178	5.64166	52.1	11.063	33.006	0.378096
62.4178	5.64166	52.0155	11.0807	32.9988	0.3796
62.4178	5.64166	51.69	11.149	32.971	0.396989
62.4178	5.64166	51.6055	11.1956	32.936	0.4015
62.4179	5.64166	51.28	11.375	32.801	0.442073
62.4179	5.64166	51.1935	11.4098	32.7736	0.4526
62.4179	5.64166	50.86	11.544	32.668	0.475785
62.4179	5.64165	50.7755	11.5578	32.648	0.4818
62.4179	5.64165	50.45	11.611	32.571	0.539762
62.4179	5.64165	50.3635	11.6215	32.5628	0.5548
62.4179	5.64165	50.03	11.662	32.531	0.566392
62.4179	5.64165	49.9455	11.6674	32.5217	0.5694
62.4179	5.64165	49.62	11.688	32.486	0.575196
62.4179	5.64165	49.21	11.684	32.465	0.582496
62.4179	5.64165	49.1235	11.6844	32.4638	0.584
62.4179	5.64165	48.79	11.686	32.459	0.566611
62.4179	5.64165	48.7035	11.686	32.4578	0.5621
62.418	5.64165	48.37	11.686	32.453	0.5621
62.418	5.64165	48.2835	11.6864	32.4514	0.5621
62.418	5.64165	47.95	11.688	32.445	0.567896
62.418	5.64165	47.8635	11.6884	32.4438	0.5694
62.418	5.64165	47.53	11.69	32.439	0.575196
62.418	5.64165	47.4435	11.6902	32.4388	0.5767
62.418	5.64165	47.11	11.691	32.438	0.5767
62.418	5.64165	47.0255	11.6912	32.4382	0.5767
62.418	5.64165	46.7	11.692	32.439	0.588292
62.418	5.64165	46.6155	11.6922	32.4388	0.5913
62.418	5.64165	46.29	11.693	32.438	0.562319
62.418	5.64165	46.2055	11.693	32.4376	0.5548
62.418	5.64165	45.88	11.693	32.436	0.563494
62.418	5.64165	45.47	11.694	32.436	0.574444
62.418	5.64165	45.3855	11.6942	32.4358	0.5767
62.4181	5.64165	45.06	11.695	32.435	0.570904
62.4181	5.64165	44.9776	11.6952	32.435	0.5694
62.4181	5.64165	44.66	11.696	32.435	0.557808
62.4181	5.64165	44.5755	11.6968	32.4346	0.5548
62.4181	5.64165	44.25	11.7	32.433	0.577985
62.4181	5.64165	44.1655	11.7	32.433	0.584
62.4181	5.64165	43.84	11.7	32.433	0.572408
62.4181	5.64165	43.7535	11.7004	32.433	0.5694
62.4181	5.64165	43.42	11.702	32.433	0.575196
62.4181	5.64165	43.3335	11.703	32.4332	0.5767
62.4181	5.64165	43	11.707	32.434	0.588292
62.4181	5.64165	42.9155	11.7078	32.4332	0.5913
62.4181	5.64165	42.59	11.711	32.43	0.579722
62.4181	5.64165	42.5031	11.711	32.43	0.5767
62.4181	5.64165	42.17	11.711	32.43	0.579594
62.4182	5.64166	41.76	11.712	32.429	0.583244
62.4182	5.64166	41.6731	11.7122	32.429	0.584
62.4182	5.64167	41.34	11.713	32.429	0.589796
62.4182	5.64167	41.2555	11.713	32.4288	0.5913
62.4182	5.64167	40.93	11.713	32.428	0.5913
62.4182	5.64167	40.8455	11.7132	32.4278	0.5913
62.4182	5.64168	40.52	11.714	32.427	0.579708
62.4182	5.64168	40.4376	11.7142	32.427	0.5767
62.4182	5.64168	40.12	11.715	32.427	0.570904
62.4182	5.64168	40.0396	11.7154	32.4268	0.5694
62.4182	5.64168	39.73	11.717	32.426	0.598344
62.4182	5.64168	39.6473	11.7174	32.4258	0.6059
62.4182	5.64168	39.33	11.719	32.425	0.594308
62.4182	5.64168	39.2496	11.719	32.4248	0.5913
62.4183	5.64168	38.94	11.719	32.424	0.585511
62.4183	5.64168	38.8593	11.7192	32.4238	0.584
62.4183	5.64168	38.55	11.72	32.423	0.581106
62.4183	5.64168	38.14	11.72	32.424	0.577456
62.4183	5.64168	38.051	11.7198	32.424	0.5767
62.4183	5.64168	37.71	11.719	32.424	0.582489
62.4183	5.64168	37.6231	11.719	32.4238	0.584
62.4183	5.64168	37.29	11.719	32.423	0.589789
62.4183	5.64168	37.2031	11.719	32.4228	0.5913
62.4183	5.64168	36.87	11.719	32.422	0.5913
62.4183	5.64168	36.7831	11.719	32.422	0.5913
62.4183	5.64168	36.45	11.719	32.422	0.608667
62.4183	5.64168	36.3631	11.7192	32.422	0.6132
62.4184	5.64168	36.03	11.72	32.422	0.595833
62.4184	5.64168	35.9451	11.7208	32.4218	0.5913
62.4184	5.64168	35.62	11.724	32.421	0.602878
62.4184	5.64168	35.5351	11.724	32.4208	0.6059
62.4184	5.64168	35.21	11.724	32.42	0.617478
62.4184	5.64168	35.1251	11.7236	32.4198	0.6205
62.4184	5.64168	34.8	11.722	32.419	0.617606
62.4184	5.64168	34.39	11.726	32.42	0.613956
62.4184	5.64168	34.3031	11.7262	32.42	0.6132
62.4184	5.64168	33.97	11.727	32.42	0.618989
62.4184	5.64168	33.8851	11.7278	32.4196	0.6205
62.4184	5.64168	33.56	11.731	32.418	0.6205
62.4184	5.64168	33.4751	11.7308	32.4176	0.6205
62.4184	5.64168	33.15	11.73	32.416	0.626289
62.4184	5.64168	33.0672	11.7294	32.4166	0.6278
62.4185	5.64168	32.75	11.727	32.419	0.598856
62.4185	5.64168	32.6672	11.7293	32.4192	0.5913
62.4185	5.64168	32.35	11.738	32.42	0.626033
62.4185	5.64168	32.2672	11.7426	32.4169	0.6351
62.4185	5.64168	31.95	11.76	32.405	0.629311
62.4185	5.64168	31.8672	11.7608	32.4052	0.6278
62.4185	5.64168	31.55	11.764	32.406	0.6278
62.4185	5.64168	31.4631	11.7626	32.4062	0.6278
62.4185	5.64168	31.13	11.757	32.407	0.622011
62.4185	5.64168	30.72	11.751	32.41	0.614711
62.4185	5.64168	30.6351	11.7498	32.4104	0.6132
62.4185	5.64168	30.31	11.745	32.412	0.607411
62.4185	5.64168	30.2231	11.7448	32.412	0.6059
62.4186	5.64168	29.89	11.744	32.412	0.6059
62.4186	5.64168	29.801	11.7436	32.4122	0.6059
62.4186	5.64168	29.46	11.742	32.413	0.617478
62.4186	5.64168	29.3731	11.7424	32.4132	0.6205
62.4186	5.64168	29.04	11.744	32.414	0.626289
62.4186	5.64168	28.9572	11.7461	32.4132	0.6278
62.4186	5.64168	28.64	11.754	32.41	0.604644
62.4186	5.64168	28.5551	11.7501	32.4104	0.5986
62.4186	5.64168	28.23	11.735	32.412	0.610178
62.4186	5.64168	28.1451	11.7354	32.413	0.6132
62.4186	5.64168	27.82	11.737	32.417	0.630567
62.4186	5.64168	27.7351	11.7403	32.4158	0.6351
62.4186	5.64168	27.41	11.753	32.411	0.6351
62.4186	5.64168	27	11.761	32.409	0.6351
62.4186	5.64168	26.9172	11.7608	32.4084	0.6351
62.4187	5.64168	26.6	11.76	32.406	0.6351
62.4187	5.64168	26.5172	11.7604	32.4062	0.6351
62.4187	5.64168	26.2	11.762	32.407	0.623522
62.4187	5.64168	26.1151	11.7614	32.4068	0.6205
62.4187	5.64168	25.79	11.759	32.406	0.603133
62.4187	5.64169	25.7051	11.7596	32.406	0.5986
62.4187	5.64169	25.38	11.762	32.406	0.604389
62.4187	5.64169	25.2931	11.7647	32.4056	0.6059
62.4187	5.64169	24.96	11.775	32.404	0.588533
62.4187	5.64169	24.8751	11.7752	32.4032	0.584
62.4187	5.64169	24.55	11.776	32.4	0.601367
62.4187	5.64169	24.4651	11.7758	32.4002	0.6059
62.4187	5.64169	24.14	11.775	32.401	0.611689
62.4187	5.64169	24.0572	11.7748	32.4012	0.6132
62.4187	5.64169	23.74	11.774	32.402	0.598728
62.4188	5.64169	23.33	11.772	32.396	0.580478
62.4188	5.64169	23.2451	11.7718	32.3979	0.5767
62.4188	5.64169	22.92	11.771	32.405	0.594067
62.4188	5.64169	22.8393	11.771	32.4044	0.5986
62.4188	5.64169	22.53	11.771	32.402	0.604389
62.4188	5.64169	22.4472	11.7714	32.402	0.6059
62.4188	5.64169	22.13	11.773	32.402	0.588533
62.4188	5.64169	22.0493	11.7732	32.4016	0.584
62.4188	5.64169	21.74	11.774	32.4	0.624522
62.4188	5.64169	21.6531	11.7738	32.4004	0.6351
62.4188	5.64169	21.32	11.773	32.402	0.629311
62.4188	5.64169	21.2331	11.7728	32.4022	0.6278
62.4188	5.64169	20.9	11.772	32.403	0.610433
62.4188	5.64169	20.8172	11.773	32.4028	0.6059
62.4189	5.64169	20.5	11.777	32.402	0.617478
62.4189	5.64169	20.4172	11.7776	32.4012	0.6205
62.4189	5.64169	20.1	11.78	32.398	0.617606
62.4189	5.64169	19.72	11.776	32.398	0.613956
62.4189	5.64169	19.6393	11.777	32.3982	0.6132
62.4189	5.64169	19.33	11.781	32.399	0.595833
62.4189	5.64169	19.2493	11.7804	32.3988	0.5913
62.4189	5.64169	18.94	11.778	32.398	0.579722
62.4189	5.64169	18.8531	11.7782	32.398	0.5767
62.4189	5.64169	18.52	11.779	32.398	0.588278
62.4189	5.64169	18.4331	11.7778	32.3986	0.5913
62.4189	5.64169	18.1	11.773	32.401	0.626033
62.4189	5.64169	18.0151	11.773	32.401	0.6351
62.4189	5.64169	17.69	11.773	32.401	0.594578
62.4189	5.64169	17.6051	11.774	32.401	0.584
62.419	5.64169	17.28	11.778	32.401	0.589789
62.419	5.64169	17.1951	11.7786	32.4012	0.5913
62.419	5.64169	16.87	11.781	32.402	0.5913
62.419	5.64169	16.7872	11.7824	32.4008	0.5913
62.419	5.64169	16.47	11.788	32.396	0.588406
62.419	5.64169	16.06	11.778	32.398	0.584756
62.419	5.64169	15.9772	11.7784	32.3986	0.584
62.419	5.64169	15.66	11.78	32.401	0.601367
62.419	5.64169	15.5689	11.78	32.4006	0.6059
62.419	5.64169	15.22	11.78	32.399	0.600111
62.419	5.64169	15.1289	11.7835	32.3988	0.5986
62.419	5.64169	14.78	11.797	32.398	0.587022
62.419	5.6417	14.6931	11.7991	32.397	0.584
62.419	5.6417	14.36	11.807	32.393	0.572422
62.4191	5.6417	14.2731	11.8074	32.3924	0.5694
62.4191	5.6417	13.94	11.809	32.39	0.575189
62.4191	5.6417	13.8572	11.8086	32.39	0.5767
62.4191	5.6417	13.54	11.807	32.39	0.5767
62.4191	5.6417	13.4551	11.807	32.39	0.5767
62.4191	5.6417	13.13	11.807	32.39	0.570911
62.4191	5.6417	13.0472	11.8068	32.3902	0.5694
62.4191	5.6417	12.73	11.806	32.391	0.580978
62.4191	5.6417	12.32	11.808	32.391	0.595578
62.4191	5.6417	12.2393	11.807	32.391	0.5986
62.4191	5.6417	11.93	11.803	32.391	0.575444
62.4191	5.6417	11.8472	11.8028	32.3912	0.5694
62.4191	5.6417	11.53	11.802	32.392	0.586767
62.4191	5.6417	11.4472	11.8022	32.3918	0.5913
62.4192	5.6417	11.13	11.803	32.391	0.585511
62.4192	5.6417	11.0451	11.8024	32.3912	0.584
62.4192	5.6417	10.72	11.8	32.392	0.595578
62.4192	5.6417	10.6393	11.8004	32.392	0.5986
62.4192	5.6417	10.33	11.802	32.392	0.5986
62.4192	5.6417	10.2431	11.8012	32.393	0.5986
62.4192	5.6417	9.91	11.798	32.397	0.604389
62.4192	5.6417	9.82099	11.797	32.3956	0.6059
62.4192	5.6417	9.48	11.793	32.39	0.611689
62.4192	5.6417	9.39099	11.793	32.391	0.6132
62.4192	5.6417	9.05	11.793	32.395	0.610306
62.4192	5.6417	8.6	11.797	32.396	0.606656
62.4192	5.6417	8.51297	11.797	32.3956	0.6059
62.4192	5.6417	8.18	11.797	32.394	0.600118
62.4192	5.6417	8.09472	11.7978	32.3936	0.5986
62.4193	5.6417	7.77	11.801	32.392	0.5986
62.4193	5.6417	7.68888	11.8014	32.3918	0.5986
62.4193	5.6417	7.38	11.803	32.391	0.581255
62.4193	5.6417	7.29264	11.803	32.391	0.5767
62.4193	5.6417	6.96	11.803	32.391	0.582482
62.4193	5.6417	6.87056	11.803	32.3914	0.584
62.4193	5.6417	6.53	11.803	32.393	0.578218
62.4193	5.6417	6.4364	11.8028	32.3928	0.5767
62.4193	5.6417	6.08	11.802	32.392	0.588263
62.4193	5.6417	5.99273	11.802	32.3922	0.5913
62.4193	5.6417	5.66	11.802	32.393	0.573933
62.4193	5.6417	5.57297	11.8024	32.393	0.5694
62.4193	5.6417	5.24	11.804	32.393	0.557837
62.4194	5.6417	4.86	11.802	32.392	0.543237
62.4194	5.6417	4.77472	11.8018	32.392	0.5402
62.4194	5.6417	4.45	11.801	32.392	0.511292
62.4194	5.6417	4.36264	11.8014	32.392	0.5037
62.4194	5.6417	4.03	11.803	32.392	0.486355
62.4194	5.6417	3.95928	11.8028	32.3918	0.4818
62.4194	5.6417	3.69	11.802	32.391	0.4818
62.4194	5.6417	3.60056	11.8016	32.3914	0.4818
62.4194	5.64171	3.26	11.8	32.393	0.487582
62.4194	5.64171	3.15808	11.8008	32.3926	0.4891
62.4194	5.64171	2.77	11.804	32.391	0.477537
62.4194	5.64171	2.69096	11.8044	32.391	0.4745
62.4194	5.6417	2.39	11.806	32.391	0.451374
62.4194	5.6417	2.3172	11.8058	32.3908	0.4453
62.4194	5.6417	2.04	11.805	32.39	0.41061
62.4194	5.6417	1.9672	11.8048	32.3904	0.4015
62.4195	5.6417	1.69	11.804	32.392	0.410172
62.4195	5.6417	1.26	11.805	32.392	0.421122
62.4195	5.6417	1.18096	11.8048	32.3916	0.4234
62.4195	5.64171	0.88	11.804	32.39	0.382929
62.4195	5.64171	0.84464	11.8042	32.3902	0.3723
62.4195	5.64171	0.71	11.805	32.391	0.3723
62.4195	5.64171	0.6684	11.805	32.3908	0.3723
62.4195	5.64171	0.51	11.805	32.39	0.383863
62.4195	5.64171	0.48504	11.8048	32.3904	0.3869
62.4195	5.64171	0.39	11.804	32.392	0.369555
62.4195	5.64171	0.38792	11.804	32.392	0.365
62.4195	5.64171	0.38	11.804	32.392	0.353437
62.4195	5.64171	0.41328	11.804	32.3918	0.3504
62.4195	5.6417	0.54	11.804	32.391	0.361963
62.4195	5.6417	0.5712	11.804	32.3912	0.365
62.4196	5.6417	0.69	11.804	32.392	0.365
62.4196	5.6417	0.73992	11.804	32.392	0.365
62.4196	5.64171	0.93	11.804	32.392	0.367891
62.4196	5.64171	1.14	11.803	32.393	0.371541
62.4196	5.64171	1.2024	11.803	32.3928	0.3723
62.4196	5.64171	1.44	11.803	32.392	0.389645
62.4196	5.64171	1.49616	11.8032	32.3916	0.3942
62.4196	5.64171	1.71	11.804	32.39	0.399982
62.4196	5.64171	1.77448	11.804	32.3902	0.4015
62.4196	5.6417	2.02	11.804	32.391	0.424626
62.4196	5.6417	2.08032	11.8042	32.3912	0.4307
62.4196	5.64171	2.31	11.805	32.392	0.442263
62.4196	5.64171	2.3724	11.8052	32.3916	0.4453
62.4196	5.64171	2.61	11.806	32.39	0.462645
62.4196	5.64171	2.6724	11.806	32.3902	0.4672
62.4196	5.64171	2.91	11.806	32.391	0.4672
62.4197	5.64171	2.97656	11.805	32.3908	0.4672
62.4197	5.64171	3.23	11.801	32.39	0.507671
62.4197	5.64171	3.3028	11.8012	32.3908	0.5183
62.4197	5.64171	3.58	11.802	32.394	0.512518
62.4197	5.64172	3.85	11.803	32.392	0.505218
62.4197	5.64172	3.91032	11.8032	32.3922	0.5037
62.4197	5.64171	4.14	11.804	32.393	0.526826
62.4197	5.64171	4.20656	11.804	32.393	0.5329
62.4197	5.64171	4.46	11.804	32.393	0.527118
62.4197	5.64171	4.5224	11.8032	32.3924	0.5256
62.4197	5.64171	4.76	11.8	32.39	0.566071
62.4197	5.64171	4.812	11.8019	32.3908	0.5767
62.4197	5.64171	5.01	11.809	32.394	0.559355
62.4197	5.64171	5.06824	11.8088	32.3932	0.5548
62.4197	5.64171	5.29	11.808	32.39	0.566363
62.4197	5.64171	5.35448	11.8076	32.3904	0.5694
62.4198	5.64171	5.6	11.806	32.392	0.552055
62.4198	5.64171	5.66864	11.806	32.392	0.5475
62.4198	5.64171	5.93	11.806	32.392	0.535937
62.4198	5.64171	6.00072	11.8062	32.3916	0.5329
62.4198	5.64171	6.27	11.807	32.39	0.530009
62.4198	5.64172	6.59	11.808	32.391	0.526359
62.4198	5.64172	6.65032	11.8076	32.3906	0.5256
62.4198	5.64172	6.88	11.806	32.389	0.571853
62.4198	5.64172	6.94448	11.8066	32.3894	0.584
62.4198	5.64171	7.19	11.809	32.391	0.584
62.4198	5.64171	7.25448	11.8071	32.391	0.584
62.4198	5.64171	7.5	11.8	32.391	0.612908
62.4198	5.64171	7.56656	11.8004	32.3912	0.6205
62.4198	5.64171	7.82	11.802	32.392	0.608937
62.4198	5.64171	7.88448	11.8005	32.3922	0.6059
62.4199	5.64171	8.13	11.795	32.393	0.611682
62.4199	5.64171	8.19448	11.7948	32.3934	0.6132
62.4199	5.64171	8.44	11.794	32.395	0.624763
62.4199	5.64171	8.50656	11.794	32.395	0.6278
62.4199	5.64171	8.76	11.794	32.395	0.616237
62.4199	5.64171	8.83072	11.7946	32.395	0.6132
62.4199	5.64171	9.1	11.797	32.395	0.598746
62.4199	5.64171	9.41	11.799	32.393	0.580496
62.4199	5.64171	9.47448	11.7988	32.3932	0.5767
62.4199	5.64171	9.72	11.798	32.394	0.599826
62.4199	5.64171	9.79072	11.7976	32.394	0.6059
62.4199	5.64171	10.06	11.796	32.394	0.600118
62.4199	5.64171	10.1328	11.796	32.3942	0.5986
62.4199	5.64171	10.41	11.796	32.395	0.5986
62.42	5.64171	10.4828	11.796	32.3948	0.5986
62.42	5.64171	10.76	11.796	32.394	0.604382
62.42	5.64171	10.8307	11.7972	32.394	0.6059
62.42	5.64171	11.1	11.802	32.394	0.594337
62.42	5.64171	11.1707	11.8016	32.3936	0.5913
62.42	5.64171	11.44	11.8	32.392	0.597082
62.42	5.64171	11.5066	11.8002	32.392	0.5986
62.42	5.64172	11.76	11.801	32.392	0.587037
62.42	5.64172	11.8307	11.801	32.3922	0.584
62.42	5.64172	12.1	11.801	32.393	0.584
62.42	5.64172	12.45	11.799	32.392	0.584
62.42	5.64172	12.5249	11.7992	32.3924	0.584
62.42	5.64172	12.81	11.8	32.394	0.589782
62.42	5.64172	12.887	11.799	32.3938	0.5913
62.42	5.64172	13.18	11.795	32.393	0.602863
62.4201	5.64172	13.2549	11.7952	32.3932	0.6059
62.4201	5.64172	13.54	11.796	32.394	0.6059
62.4201	5.64172	13.6149	11.7954	32.3944	0.6059
62.4201	5.64172	13.9	11.793	32.396	0.588555
62.4201	5.64172	13.9645	11.7922	32.396	0.584
62.4201	5.64172	14.21	11.789	32.396	0.612908
62.4201	5.64172	14.2766	11.789	32.396	0.6205
62.4201	5.64172	14.53	11.789	32.396	0.597374
62.4201	5.64172	14.5966	11.7886	32.3962	0.5913
62.4201	5.64172	14.85	11.787	32.397	0.597082
62.4201	5.64172	14.9186	11.7874	32.3972	0.5986
62.4201	5.64172	15.18	11.789	32.398	0.595709
62.4201	5.64172	15.51	11.788	32.396	0.592059
62.4201	5.64172	15.5849	11.789	32.396	0.5913
62.4201	5.64172	15.87	11.793	32.396	0.602863
62.4202	5.64172	15.9428	11.792	32.3958	0.6059
62.4202	5.64172	16.22	11.788	32.395	0.617463
62.4202	5.64172	16.2907	11.7876	32.3956	0.6205
62.4202	5.64172	16.56	11.786	32.398	0.603155
62.4202	5.64172	16.6286	11.7862	32.398	0.5986
62.4202	5.64172	16.89	11.787	32.398	0.5986
62.4202	5.64172	16.9586	11.7868	32.3978	0.5986
62.4202	5.64172	17.22	11.786	32.397	0.615945
62.4202	5.64172	17.2866	11.7862	32.3972	0.6205
62.4202	5.64172	17.54	11.787	32.398	0.614718
62.4202	5.64172	17.6066	11.7868	32.3978	0.6132
62.4202	5.64172	17.86	11.786	32.397	0.572729
62.4202	5.64172	17.9286	11.7858	32.397	0.5621
62.4202	5.64172	18.19	11.785	32.397	0.573663
62.4202	5.64172	18.54	11.781	32.398	0.588263
62.4203	5.64172	18.6128	11.7806	32.3982	0.5913
62.4203	5.64172	18.89	11.779	32.399	0.585518
62.4203	5.64172	18.9607	11.7771	32.3992	0.584
62.4203	5.64172	19.23	11.77	32.4	0.607126
62.4203	5.64172	19.3028	11.7698	32.4006	0.6132
62.4203	5.64172	19.58	11.769	32.403	0.624763
62.4203	5.64172	19.6486	11.7698	32.4034	0.6278
62.4203	5.64172	19.91	11.773	32.405	0.59311
62.4203	5.64172	19.9786	11.7726	32.4046	0.584
62.4203	5.64172	20.24	11.771	32.403	0.601345
62.4203	5.64172	20.3128	11.771	32.4034	0.6059
62.4203	5.64172	20.59	11.771	32.405	0.617463
62.4203	5.64172	20.6586	11.7706	32.4048	0.6205
62.4203	5.64172	20.92	11.769	32.404	0.626282
62.4203	5.64172	20.9929	11.7675	32.4042	0.6278
62.4204	5.64172	21.27	11.762	32.405	0.610477
62.4204	5.64172	21.61	11.765	32.408	0.588577
62.4204	5.64172	21.679	11.7631	32.4078	0.584
62.4204	5.64172	21.94	11.756	32.407	0.62442
62.4204	5.64172	22.009	11.7535	32.4083	0.6351
62.4204	5.64172	22.27	11.744	32.413	0.646649
62.4204	5.64172	22.339	11.744	32.4134	0.6497
62.4204	5.64172	22.6	11.744	32.415	0.632377
62.4204	5.64172	22.6711	11.7467	32.4131	0.6278
62.4204	5.64172	22.94	11.757	32.406	0.622026
62.4204	5.64172	23.0152	11.7541	32.4079	0.6205
62.4204	5.64172	23.3	11.743	32.415	0.6205
62.4204	5.64172	23.3711	11.7434	32.4148	0.6205
62.4204	5.64172	23.64	11.745	32.414	0.632049
62.4204	5.64172	23.709	11.7435	32.4142	0.6351
62.4205	5.64172	23.97	11.738	32.415	0.646649
62.4205	5.64172	24.039	11.7376	32.4154	0.6497
62.4205	5.64172	24.3	11.736	32.417	0.623716
62.4205	5.64172	24.65	11.735	32.418	0.590866
62.4205	5.64172	24.7232	11.7354	32.418	0.584
62.4205	5.64172	25	11.737	32.418	0.612872
62.4205	5.64172	25.0731	11.7368	32.418	0.6205
62.4205	5.64173	25.35	11.736	32.418	0.626274
62.4205	5.64173	25.4273	11.7356	32.4182	0.6278
62.4205	5.64173	25.72	11.734	32.419	0.656672
62.4205	5.64173	25.7932	11.734	32.419	0.6643
62.4205	5.64173	26.07	11.734	32.419	0.618106
62.4205	5.64173	26.1431	11.734	32.419	0.6059
62.4205	5.64173	26.42	11.734	32.419	0.623223
62.4205	5.64173	26.4911	11.7342	32.419	0.6278
62.4206	5.64173	26.76	11.735	32.419	0.639349
62.4206	5.64173	26.8331	11.7348	32.4188	0.6424
62.4206	5.64173	27.11	11.734	32.418	0.6424
62.4206	5.64173	27.1873	11.734	32.4182	0.6424
62.4206	5.64173	27.48	11.734	32.419	0.648174
62.4206	5.64173	27.84	11.735	32.416	0.655474
62.4206	5.64173	27.9111	11.7344	32.417	0.657
62.4206	5.64173	28.18	11.732	32.421	0.633903
62.4206	5.64173	28.2532	11.7316	32.421	0.6278
62.4206	5.64173	28.53	11.73	32.421	0.639349
62.4206	5.64173	28.6052	11.7302	32.421	0.6424
62.4206	5.64173	28.89	11.731	32.421	0.630851
62.4206	5.64173	28.9631	11.7304	32.421	0.6278
62.4206	5.64173	29.24	11.728	32.421	0.633574
62.4207	5.64173	29.3111	11.7267	32.4216	0.6351
62.4207	5.64173	29.58	11.722	32.424	0.623551
62.4207	5.64173	29.6511	11.7226	32.4244	0.6205
62.4207	5.64173	29.92	11.725	32.426	0.649372
62.4207	5.64173	29.989	11.7244	32.4254	0.657
62.4207	5.64173	30.25	11.722	32.423	0.633903
62.4207	5.64173	30.3231	11.7224	32.4234	0.6278
62.4207	5.64173	30.6	11.724	32.425	0.630687
62.4207	5.64173	30.95	11.724	32.424	0.634337
62.4207	5.64173	31.0252	11.7236	32.424	0.6351
62.4207	5.64173	31.31	11.722	32.424	0.6351
62.4207	5.64173	31.3811	11.7226	32.424	0.6351
62.4207	5.64173	31.65	11.725	32.424	0.612003
62.4207	5.64173	31.7211	11.725	32.4236	0.6059
62.4208	5.64173	31.99	11.725	32.422	0.623223
62.4208	5.64173	32.0632	11.725	32.4222	0.6278
[truncated: 11,440 more rows]

## Sheet: Runde_CTD_Hydrography
Station	Salinity	Temperature (°C)	Density	Depth (m)	Date	Time
1	32.47	11.771	24.673	1.17	6/19/2017	12:42:44
1	32.52	11.748	24.717	1.44	6/19/2017	12:42:46
1	32.51	11.741	24.71	1.25	6/19/2017	12:42:48
1	32.52	11.746	24.718	1.45	6/19/2017	12:42:52
1	32.53	11.739	24.725	1.18	6/19/2017	12:42:54
1	32.52	11.738	24.718	1.13	6/19/2017	12:42:56
1	32.51	11.746	24.709	1.32	6/19/2017	12:42:58
1	32.53	11.742	24.727	1.61	6/19/2017	12:43:00
1	32.51	11.739	24.71	1.22	6/19/2017	12:43:02
1	32.54	11.744	24.734	1.46	6/19/2017	12:43:04
1	32.6	11.743	24.783	2.14	6/19/2017	12:43:06
1	32.6	11.742	24.784	2.13	6/19/2017	12:43:08
1	32.61	11.742	24.794	2.74	6/19/2017	12:43:10
1	32.62	11.737	24.805	3.27	6/19/2017	12:43:12
1	32.61	11.733	24.799	3.38	6/19/2017	12:43:14
1	32.63	11.733	24.816	3.75	6/19/2017	12:43:16
1	32.66	11.727	24.844	4.64	6/19/2017	12:43:18
1	32.64	11.724	24.83	4.81	6/19/2017	12:43:20
1	32.62	11.726	24.814	4.81	6/19/2017	12:43:22
1	32.64	11.725	24.835	5.96	6/19/2017	12:43:24
1	32.65	11.726	24.844	6.21	6/19/2017	12:43:26
1	32.66	11.731	24.848	5.61	6/19/2017	12:43:28
1	32.66	11.73	24.851	6.31	6/19/2017	12:43:30
1	32.66	11.727	24.852	6.47	6/19/2017	12:43:32
1	32.63	11.729	24.825	5.72	6/19/2017	12:43:34
1	32.66	11.728	24.854	6.83	6/19/2017	12:43:36
1	32.66	11.722	24.861	8.18	6/19/2017	12:43:38
1	32.66	11.723	24.86	8	6/19/2017	12:43:40
1	32.66	11.721	24.866	9.32	6/19/2017	12:43:42
1	32.68	11.714	24.89	10.78	6/19/2017	12:43:44
1	32.67	11.717	24.878	10.12	6/19/2017	12:43:46
1	32.67	11.72	24.879	10.43	6/19/2017	12:43:48
1	32.68	11.718	24.89	10.95	6/19/2017	12:43:50
1	32.69	11.716	24.896	10.58	6/19/2017	12:43:52
1	32.68	11.716	24.887	10.19	6/19/2017	12:43:54
1	32.67	11.718	24.881	10.65	6/19/2017	12:43:56
1	32.68	11.716	24.89	10.97	6/19/2017	12:43:58
1	32.69	11.715	24.895	10.17	6/19/2017	12:44:00
1	32.66	11.717	24.873	10.52	6/19/2017	12:44:02
1	32.68	11.716	24.889	10.79	6/19/2017	12:44:04
1	32.67	11.714	24.882	10.77	6/19/2017	12:44:06
1	32.66	11.715	24.871	10.16	6/19/2017	12:44:08
1	32.66	11.716	24.874	10.74	6/19/2017	12:44:10
1	32.68	11.714	24.89	10.72	6/19/2017	12:44:12
1	32.67	11.714	24.88	10.32	6/19/2017	12:44:14
1	32.66	11.715	24.874	10.67	6/19/2017	12:44:16
1	32.67	11.714	24.882	10.7	6/19/2017	12:44:18
1	32.68	11.715	24.888	10.5	6/19/2017	12:44:20
1	32.66	11.715	24.873	10.53	6/19/2017	12:44:22
1	32.69	11.717	24.896	10.63	6/19/2017	12:44:24
1	32.68	11.717	24.889	10.67	6/19/2017	12:44:26
1	32.69	11.718	24.896	10.71	6/19/2017	12:44:28
1	32.68	11.714	24.888	10.4	6/19/2017	12:44:30
1	32.69	11.716	24.897	10.74	6/19/2017	12:44:32
1	32.68	11.715	24.89	10.85	6/19/2017	12:44:34
1	32.69	11.715	24.895	10.25	6/19/2017	12:44:36
1	32.67	11.716	24.881	10.74	6/19/2017	12:44:38
1	32.7	11.714	24.906	10.9	6/19/2017	12:44:40
1	32.68	11.716	24.886	10.1	6/19/2017	12:44:42
1	32.68	11.716	24.889	10.68	6/19/2017	12:44:44
1	32.7	11.714	24.906	10.84	6/19/2017	12:44:46
1	32.69	11.714	24.896	10.5	6/19/2017	12:44:48
1	32.67	11.714	24.88	10.32	6/19/2017	12:44:50
1	32.68	11.715	24.889	10.65	6/19/2017	12:44:52
1	32.69	11.715	24.895	10.26	6/19/2017	12:44:54
1	32.65	11.714	24.858	8.98	6/19/2017	12:44:56
1	32.67	11.716	24.875	9.23	6/19/2017	12:44:58
1	32.67	11.715	24.872	8.67	6/19/2017	12:45:00
1	32.65	11.721	24.852	7.93	6/19/2017	12:45:02
1	32.66	11.727	24.855	7.15	6/19/2017	12:45:04
1	32.66	11.729	24.855	7.11	6/19/2017	12:45:06
1	32.65	11.734	24.845	6.78	6/19/2017	12:45:08
1	32.67	11.729	24.855	5.33	6/19/2017	12:45:10
1	32.66	11.733	24.847	5.54	6/19/2017	12:45:12
1	32.66	11.732	24.845	4.98	6/19/2017	12:45:14
1	32.66	11.735	24.84	4.14	6/19/2017	12:45:16
1	32.67	11.736	24.847	3.81	6/19/2017	12:45:18
1	32.67	11.735	24.847	3.76	6/19/2017	12:45:20
1	32.67	11.736	24.841	2.53	6/19/2017	12:45:22
1	32.66	11.736	24.832	2.22	6/19/2017	12:45:24
1	32.67	11.738	24.838	2.02	6/19/2017	12:45:26
1	32.67	11.734	24.835	1.25	6/19/2017	12:45:28
1	32.68	11.732	24.844	1.3	6/19/2017	12:45:38
1	32.67	11.73	24.838	1.67	6/19/2017	12:45:40
1	32.68	11.729	24.848	2.21	6/19/2017	12:45:42
1	32.69	11.731	24.858	2.64	6/19/2017	12:45:44
1	32.69	11.73	24.861	3.32	6/19/2017	12:45:46
1	32.69	11.732	24.862	3.68	6/19/2017	12:45:48
1	32.71	11.735	24.879	4.09	6/19/2017	12:45:50
1	32.68	11.739	24.858	4.81	6/19/2017	12:45:52
1	32.69	11.74	24.866	4.82	6/19/2017	12:45:54
1	32.7	11.734	24.879	5.68	6/19/2017	12:45:56
1	32.7	11.732	24.881	6.02	6/19/2017	12:45:58
1	32.71	11.734	24.888	6.06	6/19/2017	12:46:00
1	32.7	11.738	24.885	7.2	6/19/2017	12:46:02
1	32.7	11.736	24.884	6.99	6/19/2017	12:46:04
1	32.7	11.739	24.887	7.69	6/19/2017	12:46:06
1	32.71	11.742	24.896	8.24	6/19/2017	12:46:08
1	32.7	11.744	24.89	8.71	6/19/2017	12:46:10
1	32.7	11.744	24.89	8.69	6/19/2017	12:46:12
1	32.7	11.745	24.893	9.33	6/19/2017	12:46:14
1	32.71	11.747	24.905	10.33	6/19/2017	12:46:16
1	32.69	11.745	24.888	9.94	6/19/2017	12:46:18
1	32.72	11.747	24.914	10.56	6/19/2017	12:46:20
1	32.72	11.749	24.918	11.59	6/19/2017	12:46:22
1	32.71	11.745	24.91	11.34	6/19/2017	12:46:24
1	32.69	11.747	24.897	12.04	6/19/2017	12:46:26
1	32.72	11.733	24.926	12.71	6/19/2017	12:46:28
1	32.69	11.742	24.901	12.6	6/19/2017	12:46:30
1	32.74	11.727	24.945	13.28	6/19/2017	12:46:32
1	32.72	11.71	24.937	14.29	6/19/2017	12:46:34
1	32.68	11.73	24.9	13.7	6/19/2017	12:46:36
1	32.73	11.713	24.946	14.59	6/19/2017	12:46:38
1	32.72	11.707	24.944	15.58	6/19/2017	12:46:40
1	32.72	11.707	24.941	14.97	6/19/2017	12:46:42
1	32.7	11.707	24.929	15.8	6/19/2017	12:46:44
1	32.71	11.703	24.943	16.93	6/19/2017	12:46:46
1	32.72	11.704	24.949	16.53	6/19/2017	12:46:48
1	32.73	11.705	24.958	16.85	6/19/2017	12:46:50
1	32.72	11.701	24.956	18.12	6/19/2017	12:46:52
1	32.71	11.7	24.95	18.37	6/19/2017	12:46:54
1	32.72	11.703	24.955	17.81	6/19/2017	12:46:56
1	32.74	11.698	24.977	19.19	6/19/2017	12:46:58
1	32.73	11.691	24.974	19.89	6/19/2017	12:47:00
1	32.72	11.692	24.963	19.15	6/19/2017	12:47:02
1	32.72	11.69	24.968	20.3	6/19/2017	12:47:04
1	32.74	11.691	24.988	21.22	6/19/2017	12:47:06
1	32.74	11.689	24.987	20.97	6/19/2017	12:47:08
1	32.73	11.69	24.98	21.23	6/19/2017	12:47:10
1	32.73	11.69	24.987	22.8	6/19/2017	12:47:12
1	32.73	11.691	24.985	22.43	6/19/2017	12:47:14
1	32.73	11.689	24.985	22.25	6/19/2017	12:47:16
1	32.75	11.683	25.009	23.99	6/19/2017	12:47:18
1	32.73	11.684	24.993	23.94	6/19/2017	12:47:20
1	32.73	11.681	24.993	23.7	6/19/2017	12:47:22
1	32.75	11.682	25.015	25.16	6/19/2017	12:47:24
1	32.74	11.68	25.008	25.19	6/19/2017	12:47:26
1	32.74	11.681	25.009	25.45	6/19/2017	12:47:28
1	32.75	11.681	25.02	26.2	6/19/2017	12:47:30
1	32.75	11.681	25.023	26.82	6/19/2017	12:47:32
1	32.75	11.681	25.021	26.51	6/19/2017	12:47:34
1	32.74	11.681	25.018	27.54	6/19/2017	12:47:36
1	32.75	11.68	25.029	28.27	6/19/2017	12:47:38
1	32.75	11.68	25.027	27.81	6/19/2017	12:47:40
1	32.77	11.681	25.046	28.69	6/19/2017	12:47:42
1	32.74	11.683	25.028	29.83	6/19/2017	12:47:44
1	32.74	11.682	25.027	29.57	6/19/2017	12:47:46
1	32.75	11.682	25.036	29.93	6/19/2017	12:47:48
1	32.76	11.681	25.049	31.07	6/19/2017	12:47:50
1	32.75	11.681	25.042	31.16	6/19/2017	12:47:52
1	32.74	11.682	25.034	31.19	6/19/2017	12:47:54
1	32.76	11.678	25.057	32.53	6/19/2017	12:47:56
1	32.76	11.675	25.057	32.56	6/19/2017	12:47:58
1	32.76	11.678	25.056	32.46	6/19/2017	12:48:00
1	32.76	11.675	25.063	33.76	6/19/2017	12:48:02
1	32.75	11.673	25.056	33.9	6/19/2017	12:48:04
1	32.75	11.674	25.056	33.95	6/19/2017	12:48:06
1	32.74	11.675	25.053	34.98	6/19/2017	12:48:08
1	32.75	11.673	25.063	35.41	6/19/2017	12:48:10
1	32.76	11.674	25.07	35.3	6/19/2017	12:48:12
1	32.78	11.674	25.089	36.16	6/19/2017	12:48:14
1	32.75	11.672	25.069	36.86	6/19/2017	12:48:16
1	32.75	11.674	25.069	36.82	6/19/2017	12:48:18
1	32.74	11.675	25.063	37.2	6/19/2017	12:48:20
1	32.75	11.669	25.077	38.42	6/19/2017	12:48:22
1	32.75	11.67	25.076	38.29	6/19/2017	12:48:24
1	32.75	11.671	25.077	38.54	6/19/2017	12:48:26
1	32.74	11.666	25.074	39.45	6/19/2017	12:48:28
1	32.73	11.658	25.07	39.93	6/19/2017	12:48:30
1	32.75	11.666	25.085	39.99	6/19/2017	12:48:32
1	32.76	11.66	25.097	40.77	6/19/2017	12:48:34
1	32.76	11.654	25.099	40.92	6/19/2017	12:48:36
1	32.76	11.654	25.101	41.5	6/19/2017	12:48:38
1	32.78	11.648	25.121	42.11	6/19/2017	12:48:40
1	32.79	11.649	25.129	42.21	6/19/2017	12:48:42
1	32.79	11.652	25.132	43.09	6/19/2017	12:48:44
1	32.82	11.653	25.156	43.28	6/19/2017	12:48:46
1	32.81	11.653	25.151	43.75	6/19/2017	12:48:48
1	32.84	11.652	25.175	43.98	6/19/2017	12:48:50
1	32.83	11.657	25.169	44.58	6/19/2017	12:48:52
1	32.84	11.657	25.181	45.44	6/19/2017	12:48:54
1	32.86	11.657	25.196	45.3	6/19/2017	12:48:56
1	32.85	11.656	25.19	45.81	6/19/2017	12:48:58
1	32.85	11.652	25.194	46.5	6/19/2017	12:49:00
1	32.86	11.654	25.203	46.75	6/19/2017	12:49:02
1	32.87	11.645	25.214	47.24	6/19/2017	12:49:04
1	32.88	11.646	25.223	47.59	6/19/2017	12:49:06
1	32.92	11.61	25.265	48.4	6/19/2017	12:49:08
1	32.91	11.626	25.254	48.41	6/19/2017	12:49:10
1	32.88	11.639	25.23	48.66	6/19/2017	12:49:12
1	32.97	11.556	25.318	49.41	6/19/2017	12:49:14
1	33.05	11.473	25.399	50.15	6/19/2017	12:49:16
1	32.99	11.521	25.343	50.1	6/19/2017	12:49:18
1	33	11.519	25.353	50.57	6/19/2017	12:49:20
1	33.06	11.448	25.415	51.11	6/19/2017	12:49:22
1	33.11	11.408	25.464	51.58	6/19/2017	12:49:24
1	33.2	11.29	25.557	52.02	6/19/2017	12:49:26
1	33.26	11.208	25.622	52.72	6/19/2017	12:49:28
1	33.22	11.202	25.591	52.59	6/19/2017	12:49:30
1	33.25	11.2	25.618	53.27	6/19/2017	12:49:32
1	33.29	11.125	25.667	54.24	6/19/2017	12:49:34
1	33.26	11.136	25.641	54.18	6/19/2017	12:49:36
1	33.27	11.147	25.651	54.94	6/19/2017	12:49:38
1	33.31	11.079	25.696	55.39	6/19/2017	12:49:40
1	33.29	11.084	25.681	55.74	6/19/2017	12:49:42
1	33.44	10.909	25.833	56.54	6/19/2017	12:49:44
1	33.41	10.834	25.824	56.72	6/19/2017	12:49:46
1	33.45	10.822	25.859	57.25	6/19/2017	12:49:48
1	33.76	10.394	26.178	57.71	6/19/2017	12:49:50
1	33.75	10.262	26.195	58.26	6/19/2017	12:49:52
1	33.8	10.143	26.257	58.64	6/19/2017	12:49:54
1	33.78	10.134	26.244	58.9	6/19/2017	12:49:56
1	33.81	10.118	26.273	59.64	6/19/2017	12:49:58
1	33.81	10.125	26.274	60.08	6/19/2017	12:50:00
1	33.77	10.122	26.244	60.25	6/19/2017	12:50:02
1	33.82	10.105	26.288	60.78	6/19/2017	12:50:04
1	33.8	10.069	26.281	61.16	6/19/2017	12:50:06
1	33.8	10.063	26.282	61.24	6/19/2017	12:50:08
1	33.78	10.087	26.263	61.37	6/19/2017	12:50:10
1	33.81	10.141	26.276	61.15	6/19/2017	12:50:12
1	33.76	10.112	26.242	61.21	6/19/2017	12:50:14
1	33.79	10.115	26.266	61.45	6/19/2017	12:50:16
1	33.84	10.057	26.319	62.24	6/19/2017	12:50:18
1	33.75	10.136	26.232	61.52	6/19/2017	12:50:20
1	33.78	10.129	26.256	61.53	6/19/2017	12:50:22
1	33.75	10.165	26.23	62.18	6/19/2017	12:50:24
1	33.79	10.152	26.262	61.79	6/19/2017	12:50:26
1	33.76	10.129	26.242	61.72	6/19/2017	12:50:28
1	33.8	10.126	26.274	61.9	6/19/2017	12:50:30
1	33.78	10.14	26.257	61.95	6/19/2017	12:50:32
1	33.8	10.064	26.282	61.37	6/19/2017	12:50:34
1	33.78	10.123	26.261	62.25	6/19/2017	12:50:36
1	33.8	10.096	26.279	61.75	6/19/2017	12:50:38
1	33.8	10.083	26.281	61.68	6/19/2017	12:50:40
1	33.78	10.09	26.266	62.1	6/19/2017	12:50:42
1	33.78	10.076	26.266	61.52	6/19/2017	12:50:44
1	33.79	10.08	26.274	61.88	6/19/2017	12:50:46
1	33.8	10.066	26.285	62.01	6/19/2017	12:50:48
1	33.8	10.062	26.284	61.74	6/19/2017	12:50:50
1	33.8	10.065	26.285	61.89	6/19/2017	12:50:52
1	33.81	10.062	26.291	61.51	6/19/2017	12:50:54
1	33.79	10.068	26.277	62.04	6/19/2017	12:50:56
1	33.82	10.059	26.301	61.92	6/19/2017	12:50:58
1	33.81	10.057	26.293	61.62	6/19/2017	12:51:00
1	33.81	10.057	26.294	61.89	6/19/2017	12:51:02
1	33.8	10.055	26.285	61.62	6/19/2017	12:51:04
1	33.8	10.053	26.287	61.87	6/19/2017	12:51:06
1	33.81	10.049	26.292	61.26	6/19/2017	12:51:08
1	33.8	10.053	26.281	60.66	6/19/2017	12:51:10
1	33.8	10.057	26.279	60.42	6/19/2017	12:51:12
1	33.78	10.082	26.256	59.66	6/19/2017	12:51:14
1	33.78	10.095	26.252	59.15	6/19/2017	12:51:16
1	33.78	10.112	26.247	58.71	6/19/2017	12:51:18
1	33.78	10.115	26.245	58.47	6/19/2017	12:51:20
1	33.75	10.162	26.21	57.74	6/19/2017	12:51:22
1	33.62	10.365	26.07	56.91	6/19/2017	12:51:24
1	33.55	10.611	25.972	56.76	6/19/2017	12:51:26
1	33.43	10.637	25.872	56.33	6/19/2017	12:51:28
1	33.41	10.844	25.816	55.37	6/19/2017	12:51:30
1	33.44	10.814	25.844	55.38	6/19/2017	12:51:32
1	33.32	10.94	25.726	54.73	6/19/2017	12:51:34
1	33.29	11.081	25.674	54.14	6/19/2017	12:51:36
1	33.28	11.11	25.659	53.49	6/19/2017	12:51:38
1	33.28	11.108	25.656	52.93	6/19/2017	12:51:40
1	33.28	11.104	25.657	52.82	6/19/2017	12:51:42
1	33.27	11.122	25.644	52.55	6/19/2017	12:51:44
1	33.19	11.257	25.552	51.21	6/19/2017	12:51:46
1	33.18	11.292	25.537	50.98	6/19/2017	12:51:48
1	33.24	11.217	25.596	50.73	6/19/2017	12:51:50
1	33.09	11.401	25.443	50.05	6/19/2017	12:51:52
1	33.11	11.399	25.458	49.98	6/19/2017	12:51:54
1	32.96	11.559	25.306	48.66	6/19/2017	12:51:56
1	32.97	11.534	25.318	48.46	6/19/2017	12:51:58
1	33.04	11.453	25.387	48.52	6/19/2017	12:52:00
1	32.92	11.62	25.257	47.12	6/19/2017	12:52:02
1	32.91	11.621	25.248	46.87	6/19/2017	12:52:04
1	32.97	11.55	25.308	46.98	6/19/2017	12:52:06
1	32.87	11.631	25.211	45.92	6/19/2017	12:52:08
1	32.86	11.652	25.194	44.73	6/19/2017	12:52:10
1	32.9	11.614	25.234	45.23	6/19/2017	12:52:12
1	32.89	11.612	25.225	44.73	6/19/2017	12:52:14
1	32.85	11.654	25.18	43.4	6/19/2017	12:52:16
1	32.86	11.652	25.188	43.4	6/19/2017	12:52:18
1	32.86	11.644	25.188	43.02	6/19/2017	12:52:20
1	32.81	11.647	25.143	41.8	6/19/2017	12:52:22
1	32.83	11.645	25.16	41.99	6/19/2017	12:52:24
1	32.87	11.647	25.188	41.44	6/19/2017	12:52:26
1	32.8	11.636	25.131	40.34	6/19/2017	12:52:28
1	32.81	11.638	25.139	40.48	6/19/2017	12:52:30
1	32.82	11.64	25.141	39.46	6/19/2017	12:52:32
1	32.78	11.641	25.109	39.26	6/19/2017	12:52:34
1	32.77	11.657	25.094	38.37	6/19/2017	12:52:36
1	32.77	11.656	25.094	38.11	6/19/2017	12:52:38
1	32.78	11.652	25.101	37.87	6/19/2017	12:52:40
1	32.74	11.664	25.061	36.43	6/19/2017	12:52:42
1	32.76	11.662	25.076	36.24	6/19/2017	12:52:44
1	32.79	11.656	25.1	36.12	6/19/2017	12:52:46
1	32.74	11.668	25.055	35.19	6/19/2017	12:52:48
1	32.76	11.67	25.067	34.61	6/19/2017	12:52:50
1	32.73	11.668	25.044	34.44	6/19/2017	12:52:52
1	32.77	11.671	25.071	33.67	6/19/2017	12:52:54
1	32.76	11.67	25.06	33.01	6/19/2017	12:52:56
1	32.74	11.67	25.045	33.17	6/19/2017	12:52:58
1	32.76	11.672	25.055	31.99	6/19/2017	12:53:00
1	32.75	11.674	25.044	31.22	6/19/2017	12:53:02
1	32.75	11.671	25.046	31.52	6/19/2017	12:53:04
1	32.75	11.678	25.039	30.45	6/19/2017	12:53:06
1	32.75	11.681	25.036	29.83	6/19/2017	12:53:08
1	32.74	11.679	25.027	29.53	6/19/2017	12:53:10
1	32.74	11.68	25.026	29.25	6/19/2017	12:53:12
1	32.73	11.681	25.013	28.25	6/19/2017	12:53:14
1	32.73	11.682	25.009	27.33	6/19/2017	12:53:16
1	32.75	11.68	25.028	27.93	6/19/2017	12:53:18
1	32.74	11.682	25.014	26.78	6/19/2017	12:53:20
1	32.73	11.682	25.003	25.87	6/19/2017	12:53:22
1	32.73	11.682	25.002	25.84	6/19/2017	12:53:24
1	32.75	11.682	25.014	25.02	6/19/2017	12:53:26
1	32.74	11.683	25.004	24.44	6/19/2017	12:53:28
1	32.75	11.683	25.011	24.26	6/19/2017	12:53:30
1	32.74	11.684	24.999	23.45	6/19/2017	12:53:32
1	32.74	11.684	24.997	22.9	6/19/2017	12:53:34
1	32.73	11.686	24.987	22.61	6/19/2017	12:53:36
1	32.73	11.688	24.981	21.44	6/19/2017	12:53:38
1	32.73	11.685	24.984	21.92	6/19/2017	12:53:40
1	32.74	11.687	24.986	20.78	6/19/2017	12:53:42
1	32.74	11.692	24.98	19.57	6/19/2017	12:53:44
1	32.74	11.687	24.984	20.22	6/19/2017	12:53:46
1	32.72	11.687	24.963	19.11	6/19/2017	12:53:48
1	32.74	11.687	24.975	18.26	6/19/2017	12:53:50
1	32.73	11.688	24.969	18.62	6/19/2017	12:53:52
1	32.72	11.69	24.954	17.25	6/19/2017	12:53:54
1	32.74	11.689	24.969	16.9	6/19/2017	12:53:56
1	32.73	11.689	24.96	16.69	6/19/2017	12:53:58
1	32.72	11.693	24.948	15.96	6/19/2017	12:54:00
1	32.73	11.695	24.952	15.23	6/19/2017	12:54:02
1	32.73	11.695	24.951	14.95	6/19/2017	12:54:04
1	32.74	11.694	24.957	14.43	6/19/2017	12:54:06
1	32.73	11.695	24.946	13.77	6/19/2017	12:54:08
1	32.72	11.697	24.935	13.16	6/19/2017	12:54:10
1	32.73	11.697	24.941	12.79	6/19/2017	12:54:12
1	32.73	11.698	24.937	12.02	6/19/2017	12:54:14
1	32.71	11.698	24.92	11.64	6/19/2017	12:54:16
1	32.71	11.698	24.919	11.33	6/19/2017	12:54:18
1	32.71	11.709	24.91	9.99	6/19/2017	12:54:20
1	32.71	11.706	24.912	10.11	6/19/2017	12:54:22
1	32.71	11.703	24.91	9.66	6/19/2017	12:54:24
1	32.71	11.708	24.904	8.57	6/19/2017	12:54:26
1	32.69	11.709	24.888	8.35	6/19/2017	12:54:28
1	32.72	11.704	24.911	8.14	6/19/2017	12:54:30
1	32.7	11.711	24.889	7.1	6/19/2017	12:54:32
1	32.7	11.712	24.886	6.43	6/19/2017	12:54:34
1	32.7	11.709	24.887	6.57	6/19/2017	12:54:36
1	32.7	11.711	24.882	5.46	6/19/2017	12:54:38
1	32.7	11.714	24.879	4.95	6/19/2017	12:54:40
1	32.69	11.713	24.87	4.65	6/19/2017	12:54:42
1	32.69	11.712	24.868	4.2	6/19/2017	12:54:44
1	32.69	11.723	24.861	3.12	6/19/2017	12:54:46
1	32.68	11.723	24.853	2.9	6/19/2017	12:54:48
1	32.69	11.716	24.861	2.8	6/19/2017	12:54:50
1	32.69	11.725	24.854	1.56	6/19/2017	12:54:52
1	32.69	11.726	24.852	1.1	6/19/2017	12:54:54
1	32.69	11.723	24.853	1.28	6/19/2017	12:54:56
1	32.7	11.723	24.86	1.11	6/19/2017	12:55:02
1	32.7	11.725	24.859	1.05	6/19/2017	12:55:06
1	32.68	11.729	24.845	1.35	6/19/2017	12:55:08
1	32.69	11.728	24.853	1.38	6/19/2017	12:55:10
1	32.71	11.724	24.869	1.48	6/19/2017	12:55:14
1	32.68	11.725	24.845	1.38	6/19/2017	12:55:16
1	32.7	11.723	24.861	1.31	6/19/2017	12:55:20
1	32.7	11.721	24.862	1.39	6/19/2017	12:55:22
1	32.69	11.724	24.852	1.15	6/19/2017	12:55:26
1	32.7	11.723	24.861	1.41	6/19/2017	12:55:28
1	32.7	11.723	24.86	1.09	6/19/2017	12:55:30
1	32.68	11.723	24.844	1	6/19/2017	12:55:32
1	32.68	11.723	24.846	1.45	6/19/2017	12:55:34
1	32.71	11.723	24.868	1.16	6/19/2017	12:55:36
1	32.7	11.722	24.862	1.5	6/19/2017	12:55:40
1	32.7	11.725	24.86	1.14	6/19/2017	12:55:42
1	32.7	11.727	24.859	1.1	6/19/2017	12:55:44
1	32.7	11.725	24.86	1.24	6/19/2017	12:55:46
1	32.69	11.724	24.853	1.23	6/19/2017	12:55:48
1	32.67	11.724	24.837	1.16	6/19/2017	12:55:50
1	32.71	11.723	24.869	1.35	6/19/2017	12:55:52
1	32.67	11.724	24.836	1.03	6/19/2017	12:55:54
1	32.69	11.723	24.853	1.36	6/19/2017	12:55:56
1	32.68	11.724	24.844	1.14	6/19/2017	12:55:58
1	32.71	11.726	24.867	1.03	6/19/2017	12:56:00
1	32.67	11.726	24.837	1.33	6/19/2017	12:56:02
1	32.71	11.724	24.868	1.27	6/19/2017	12:56:04
1	32.69	11.726	24.853	1.36	6/19/2017	12:56:08
1	32.68	11.726	24.845	1.32	6/19/2017	12:56:10
1	32.67	11.727	24.837	1.23	6/19/2017	12:56:14
1	32.68	11.728	24.845	1.39	6/19/2017	12:56:16
1	32.69	11.73	24.851	1.07	6/19/2017	12:56:18
1	32.69	11.729	24.851	1.17	6/19/2017	12:56:20
1	32.69	11.73	24.852	1.43	6/19/2017	12:56:22
1	32.68	11.73	24.843	1.11	6/19/2017	12:56:24
1	32.68	11.731	24.844	1.26	6/19/2017	12:56:26
1	32.69	11.732	24.851	1.28	6/19/2017	12:56:28
1	32.69	11.733	24.851	1.23	6/19/2017	12:56:30
1	32.7	11.73	24.859	1.26	6/19/2017	12:56:32
1	32.68	11.731	24.843	1.09	6/19/2017	12:56:34
1	32.69	11.732	24.852	1.45	6/19/2017	12:56:36
1	32.68	11.734	24.843	1.12	6/19/2017	12:56:38
1	32.69	11.734	24.85	1.07	6/19/2017	12:56:40
1	32.69	11.732	24.852	1.45	6/19/2017	12:56:42
1	32.69	11.732	24.851	1.16	6/19/2017	12:56:44
1	32.68	11.731	24.845	1.44	6/19/2017	12:56:48
1	32.69	11.73	24.852	1.28	6/19/2017	12:56:50
1	32.69	11.731	24.852	1.42	6/19/2017	12:56:54
1	32.68	11.732	24.844	1.27	6/19/2017	12:56:56
1	32.7	11.73	24.859	1.1	6/19/2017	12:56:58
1	32.68	11.732	24.844	1.26	6/19/2017	12:57:00
1	32.69	11.732	24.851	1.21	6/19/2017	12:57:02
1	32.7	11.733	24.858	1.13	6/19/2017	12:57:04
1	32.7	11.735	24.859	1.26	6/19/2017	12:57:06
1	32.7	11.733	24.858	1.15	6/19/2017	12:57:08
1	32.69	11.735	24.85	1.18	6/19/2017	12:57:10
1	32.68	11.735	24.843	1.24	6/19/2017	12:57:12
1	32.69	11.734	24.851	1.23	6/19/2017	12:57:14
1	32.68	11.735	24.843	1.19	6/19/2017	12:57:16
1	32.69	11.735	24.85	1.15	6/19/2017	12:57:18
1	32.69	11.733	24.852	1.44	6/19/2017	12:57:20
1	32.7	11.736	24.862	2.03	6/19/2017	12:57:22
1	32.68	11.733	24.847	2.14	6/19/2017	12:57:24
1	32.69	11.742	24.857	2.92	6/19/2017	12:57:26
1	32.71	11.746	24.874	3.49	6/19/2017	12:57:28
1	32.71	11.746	24.876	3.89	6/19/2017	12:57:30
1	32.71	11.745	24.877	4.12	6/19/2017	12:57:32
1	32.69	11.743	24.866	4.93	6/19/2017	12:57:34
1	32.69	11.744	24.869	5.66	6/19/2017	12:57:36
1	32.69	11.743	24.868	5.46	6/19/2017	12:57:38
1	32.7	11.741	24.881	6.39	6/19/2017	12:57:40
1	32.7	11.74	24.884	7.11	6/19/2017	12:57:42
1	32.7	11.741	24.883	7.03	6/19/2017	12:57:44
1	32.71	11.742	24.894	7.71	6/19/2017	12:57:46
1	32.71	11.742	24.898	8.51	6/19/2017	12:57:48
1	32.72	11.742	24.906	8.71	6/19/2017	12:57:50
1	32.7	11.742	24.891	8.8	6/19/2017	12:57:52
1	32.74	11.715	24.933	10.01	6/19/2017	12:57:54
1	32.7	11.708	24.904	10.24	6/19/2017	12:57:56
1	32.72	11.71	24.918	9.99	6/19/2017	12:57:58
1	32.73	11.705	24.932	11.19	6/19/2017	12:58:00
1	32.71	11.698	24.922	12.06	6/19/2017	12:58:02
1	32.73	11.701	24.934	11.5	6/19/2017	12:58:04
1	32.72	11.7	24.929	12.01	6/19/2017	12:58:06
1	32.72	11.695	24.936	13.45	6/19/2017	12:58:08
1	32.72	11.695	24.935	13.12	6/19/2017	12:58:10
1	32.73	11.695	24.946	13.81	6/19/2017	12:58:12
1	32.73	11.694	24.948	14.28	6/19/2017	12:58:14
1	32.72	11.691	24.944	14.88	6/19/2017	12:58:16
1	32.74	11.689	24.96	15.05	6/19/2017	12:58:18
1	32.75	11.689	24.971	15.65	6/19/2017	12:58:20
1	32.74	11.689	24.965	16.13	6/19/2017	12:58:22
1	32.74	11.689	24.966	16.3	6/19/2017	12:58:24
1	32.73	11.689	24.96	16.82	6/19/2017	12:58:26
1	32.73	11.689	24.963	17.32	6/19/2017	12:58:28
1	32.74	11.689	24.971	17.52	6/19/2017	12:58:30
1	32.73	11.689	24.965	17.73	6/19/2017	12:58:32
1	32.75	11.689	24.985	18.9	6/19/2017	12:58:34
1	32.74	11.688	24.977	18.83	6/19/2017	12:58:36
1	32.75	11.688	24.984	18.46	6/19/2017	12:58:38
1	32.75	11.687	24.989	19.65	6/19/2017	12:58:40
1	32.76	11.685	25.002	20.71	6/19/2017	12:58:42
1	32.76	11.685	24.998	19.9	6/19/2017	12:58:44
1	32.74	11.686	24.985	20.41	6/19/2017	12:58:46
1	32.75	11.685	24.999	21.79	6/19/2017	12:58:48
1	32.75	11.684	24.999	21.7	6/19/2017	12:58:50
1	32.75	11.685	24.999	21.74	6/19/2017	12:58:52
1	32.74	11.683	24.998	23.17	6/19/2017	12:58:54
1	32.75	11.683	25.005	23.1	6/19/2017	12:58:56
1	32.76	11.684	25.014	23.33	6/19/2017	12:58:58
1	32.76	11.681	25.02	24.52	6/19/2017	12:59:00
1	32.75	11.682	25.012	24.5	6/19/2017	12:59:02
1	32.74	11.683	25.006	24.86	6/19/2017	12:59:04
1	32.76	11.68	25.026	25.82	6/19/2017	12:59:06
1	32.75	11.678	25.021	26.36	6/19/2017	12:59:08
1	32.75	11.683	25.018	25.88	6/19/2017	12:59:10
1	32.75	11.678	25.024	27.01	6/19/2017	12:59:12
1	32.75	11.676	25.029	28.1	6/19/2017	12:59:14
1	32.75	11.676	25.026	27.37	6/19/2017	12:59:16
1	32.76	11.676	25.038	28.39	6/19/2017	12:59:18
1	32.75	11.676	25.034	29.25	6/19/2017	12:59:20
1	32.77	11.675	25.049	29.02	6/19/2017	12:59:22
1	32.76	11.676	25.044	29.74	6/19/2017	12:59:24
1	32.75	11.675	25.042	30.85	6/19/2017	12:59:26
1	32.77	11.676	25.054	30.24	6/19/2017	12:59:28
1	32.74	11.676	25.033	30.64	6/19/2017	12:59:30
1	32.75	11.673	25.048	32.08	6/19/2017	12:59:32
1	32.75	11.673	25.046	31.61	6/19/2017	12:59:34
1	32.77	11.674	25.062	31.77	6/19/2017	12:59:36
1	32.75	11.674	25.05	32.68	6/19/2017	12:59:38
1	32.76	11.673	25.058	32.64	6/19/2017	12:59:40
1	32.76	11.673	25.061	33.36	6/19/2017	12:59:42
1	32.77	11.672	25.071	33.74	6/19/2017	12:59:44
1	32.76	11.671	25.065	34.06	6/19/2017	12:59:46
1	32.77	11.668	25.075	34.57	6/19/2017	12:59:48
1	32.77	11.663	25.081	35.62	6/19/2017	12:59:50
1	32.77	11.664	25.08	35.38	6/19/2017	12:59:52
1	32.76	11.663	25.074	35.9	6/19/2017	12:59:54
1	32.78	11.66	25.095	36.93	6/19/2017	12:59:56
1	32.77	11.66	25.089	37.19	6/19/2017	12:59:58
1	32.75	11.653	25.077	37.72	6/19/2017	13:00:00
1	32.76	11.653	25.086	37.94	6/19/2017	13:00:02
1	32.77	11.654	25.097	38.73	6/19/2017	13:00:04
1	32.77	11.652	25.098	38.99	6/19/2017	13:00:06
1	32.77	11.646	25.102	39.67	6/19/2017	13:00:08
1	32.8	11.643	25.129	40.39	6/19/2017	13:00:10
1	32.78	11.642	25.114	40.43	6/19/2017	13:00:12
1	32.8	11.643	25.132	40.96	6/19/2017	13:00:14
1	32.81	11.644	25.142	41.54	6/19/2017	13:00:16
1	32.8	11.645	25.138	42.26	6/19/2017	13:00:18
1	32.83	11.645	25.163	42.71	6/19/2017	13:00:20
1	32.82	11.645	25.154	42.48	6/19/2017	13:00:22
1	32.83	11.648	25.167	43.72	6/19/2017	13:00:24
1	32.86	11.654	25.191	44.07	6/19/2017	13:00:26
1	32.87	11.648	25.2	44.1	6/19/2017	13:00:28
1	32.85	11.654	25.187	44.93	6/19/2017	13:00:30
1	32.85	11.655	25.188	45.23	6/19/2017	13:00:32
1	32.87	11.655	25.207	45.98	6/19/2017	13:00:34
1	32.88	11.655	25.215	46.03	6/19/2017	13:00:36
1	32.88	11.652	25.219	46.91	6/19/2017	13:00:38
1	32.89	11.652	25.227	46.86	6/19/2017	13:00:40
1	32.87	11.651	25.213	47.17	6/19/2017	13:00:42
1	32.91	11.627	25.255	48.75	6/19/2017	13:00:44
1	32.9	11.628	25.245	48.23	6/19/2017	13:00:46
1	32.92	11.631	25.261	48.43	6/19/2017	13:00:48
1	32.92	11.626	25.266	49.26	6/19/2017	13:00:50
1	32.97	11.575	25.317	50.03	6/19/2017	13:00:52
1	33.01	11.53	25.358	50.31	6/19/2017	13:00:54
1	32.94	11.603	25.289	50.11	6/19/2017	13:00:56
1	32.98	11.548	25.334	50.95	6/19/2017	13:00:58
1	33.12	11.398	25.473	51.45	6/19/2017	13:01:00
1	33.16	11.356	25.515	52.24	6/19/2017	13:01:02
1	33.13	11.396	25.485	52.25	6/19/2017	13:01:04
1	33.11	11.416	25.465	52.21	6/19/2017	13:01:06
1	33.18	11.312	25.544	53.36	6/19/2017	13:01:08
1	33.23	11.201	25.606	54.07	6/19/2017	13:01:10
1	33.2	11.276	25.567	53.69	6/19/2017	13:01:12
1	33.27	11.185	25.643	54.66	6/19/2017	13:01:14
1	33.24	11.139	25.629	54.96	6/19/2017	13:01:16
1	33.24	11.175	25.624	55.39	6/19/2017	13:01:18
1	33.45	10.892	25.841	56.06	6/19/2017	13:01:20
1	33.38	10.949	25.777	56.16	6/19/2017	13:01:22
1	33.43	10.911	25.825	56.63	6/19/2017	13:01:24
1	33.49	10.768	25.899	57.01	6/19/2017	13:01:26
1	33.67	10.559	26.08	57.84	6/19/2017	13:01:28
1	33.83	10.249	26.26	58.15	6/19/2017	13:01:30
1	33.69	10.291	26.143	58.05	6/19/2017	13:01:32
1	33.78	10.234	26.227	58.95	6/19/2017	13:01:34
1	33.8	10.134	26.262	59.55	6/19/2017	13:01:36
1	33.77	10.189	26.23	59.71	6/19/2017	13:01:38
1	33.76	10.211	26.22	60.05	6/19/2017	13:01:40
1	33.82	10.117	26.286	60.66	6/19/2017	13:01:42
1	33.78	10.137	26.253	60.97	6/19/2017	13:01:44
1	33.83	10.071	26.306	61.63	6/19/2017	13:01:46
1	33.84	10.054	26.318	61.85	6/19/2017	13:01:48
1	33.8	10.13	26.272	61.55	6/19/2017	13:01:50
1	33.84	10.058	26.318	62.06	6/19/2017	13:01:52
1	33.8	10.078	26.282	61.72	6/19/2017	13:01:54
1	33.81	10.078	26.292	62.19	6/19/2017	13:01:56
1	33.82	10.071	26.3	62.07	6/19/2017	13:01:58
1	33.82	10.076	26.298	61.85	6/19/2017	13:02:00
1	33.82	10.083	26.297	61.92	6/19/2017	13:02:02
1	33.83	10.073	26.307	61.9	6/19/2017	13:02:04
1	33.83	10.064	26.308	61.82	6/19/2017	13:02:06
1	33.78	10.09	26.261	61.01	6/19/2017	13:02:08
1	33.8	10.067	26.278	60.55	6/19/2017	13:02:10
1	33.81	10.059	26.284	59.87	6/19/2017	13:02:12
1	33.79	10.1	26.259	59.19	6/19/2017	13:02:14
1	33.8	10.094	26.268	59.29	6/19/2017	13:02:16
1	33.79	10.11	26.253	58.38	6/19/2017	13:02:18
1	33.79	10.119	26.249	57.78	6/19/2017	13:02:20
1	33.77	10.134	26.229	57.37	6/19/2017	13:02:22
1	33.54	10.435	25.995	56.84	6/19/2017	13:02:24
1	33.5	10.684	25.918	56.27	6/19/2017	13:02:26
1	33.47	10.751	25.881	55.81	6/19/2017	13:02:28
1	33.39	10.84	25.801	55.43	6/19/2017	13:02:30
1	33.34	10.988	25.732	54.58	6/19/2017	13:02:32
1	33.32	11.026	25.707	54.05	6/19/2017	13:02:34
1	33.34	11.007	25.725	53.87	6/19/2017	13:02:36
1	33.24	11.12	25.625	53.31	6/19/2017	13:02:38
1	33.21	11.241	25.576	52.58	6/19/2017	13:02:40
1	33.2	11.273	25.56	51.99	6/19/2017	13:02:42
1	33.17	11.302	25.53	51.67	6/19/2017	13:02:44
1	33.13	11.363	25.485	51.02	6/19/2017	13:02:46
1	33.12	11.37	25.474	50.69	6/19/2017	13:02:48
1	33.06	11.456	25.409	49.95	6/19/2017	13:02:50
1	33.07	11.455	25.416	49.72	6/19/2017	13:02:52
1	32.95	11.593	25.293	48.8	6/19/2017	13:02:54
1	32.9	11.629	25.246	48.39	6/19/2017	13:02:56
1	32.92	11.615	25.262	48.06	6/19/2017	13:02:58
1	32.89	11.637	25.232	47.37	6/19/2017	13:03:00
1	32.87	11.643	25.213	46.84	6/19/2017	13:03:02
1	32.89	11.639	25.228	46.66	6/19/2017	13:03:04
1	32.86	11.653	25.196	45.24	6/19/2017	13:03:06
1	32.86	11.65	25.196	45.19	6/19/2017	13:03:08
1	32.87	11.644	25.205	45.14	6/19/2017	13:03:10
1	32.87	11.656	25.198	43.96	6/19/2017	13:03:12
1	32.86	11.654	25.188	43.42	6/19/2017	13:03:14
1	32.87	11.653	25.195	43.34	6/19/2017	13:03:16
1	32.86	11.648	25.183	42.23	6/19/2017	13:03:18
1	32.84	11.646	25.167	41.85	6/19/2017	13:03:20
1	32.85	11.649	25.175	42.03	6/19/2017	13:03:22
1	32.84	11.644	25.162	40.71	6/19/2017	13:03:24
1	32.8	11.643	25.128	40.08	6/19/2017	13:03:26
1	32.8	11.645	25.127	39.92	6/19/2017	13:03:28
1	32.81	11.646	25.132	39.37	6/19/2017	13:03:30
1	32.78	11.65	25.106	38.91	6/19/2017	13:03:32
1	32.78	11.653	25.102	38.24	6/19/2017	13:03:34
1	32.77	11.656	25.092	37.67	6/19/2017	13:03:36
1	32.77	11.661	25.087	36.96	6/19/2017	13:03:38
1	32.75	11.657	25.071	36.7	6/19/2017	13:03:40
1	32.77	11.657	25.087	36.63	6/19/2017	13:03:42
1	32.76	11.663	25.07	34.99	6/19/2017	13:03:44
1	32.75	11.66	25.063	34.97	6/19/2017	13:03:46
1	32.76	11.662	25.067	34.3	6/19/2017	13:03:48
1	32.74	11.662	25.051	33.99	6/19/2017	13:03:50
1	32.76	11.665	25.063	33.41	6/19/2017	13:03:52
1	32.77	11.669	25.065	32.28	6/19/2017	13:03:54
1	32.77	11.667	25.065	32.21	6/19/2017	13:03:56
1	32.76	11.665	25.057	32.12	6/19/2017	13:03:58
1	32.73	11.675	25.025	30.67	6/19/2017	13:04:00
1	32.75	11.674	25.04	30.45	6/19/2017	13:04:02
1	32.75	11.675	25.038	29.99	6/19/2017	13:04:04
1	32.75	11.677	25.036	29.61	6/19/2017	13:04:06
1	32.75	11.678	25.032	28.88	6/19/2017	13:04:08
1	32.76	11.677	25.038	28.42	6/19/2017	13:04:10
1	32.75	11.677	25.028	27.91	6/19/2017	13:04:12
1	32.75	11.678	25.023	26.76	6/19/2017	13:04:14
1	32.74	11.677	25.017	27.16	6/19/2017	13:04:16
1	32.75	11.679	25.021	26.33	6/19/2017	13:04:18
1	32.76	11.678	25.023	25.19	6/19/2017	13:04:20
1	32.76	11.679	25.023	25.03	6/19/2017	13:04:22
1	32.76	11.679	25.021	24.64	6/19/2017	13:04:24
1	32.76	11.679	25.018	24.09	6/19/2017	13:04:26
1	32.75	11.679	25.006	23.09	6/19/2017	13:04:28
1	32.74	11.678	24.999	23.28	6/19/2017	13:04:30
1	32.74	11.68	24.993	22	6/19/2017	13:04:32
1	32.75	11.68	24.999	21.56	6/19/2017	13:04:34
1	32.76	11.679	25.008	21.7	6/19/2017	13:04:36
1	32.75	11.682	24.993	20.36	6/19/2017	13:04:38
1	32.74	11.682	24.983	19.86	6/19/2017	13:04:40
1	32.76	11.68	24.998	19.71	6/19/2017	13:04:42
1	32.74	11.681	24.98	19.09	6/19/2017	13:04:44
1	32.75	11.681	24.984	18.25	6/19/2017	13:04:46
1	32.75	11.68	24.984	18.15	6/19/2017	13:04:48
1	32.74	11.68	24.972	17.25	6/19/2017	13:04:50
1	32.75	11.68	24.976	16.4	6/19/2017	13:04:52
1	32.75	11.68	24.977	16.64	6/19/2017	13:04:54
1	32.74	11.68	24.966	15.87	6/19/2017	13:04:56
1	32.75	11.68	24.968	14.77	6/19/2017	13:04:58
1	32.75	11.68	24.968	14.74	6/19/2017	13:05:00
1	32.74	11.683	24.957	14.12	6/19/2017	13:05:02
1	32.74	11.689	24.952	13.19	6/19/2017	13:05:04
1	32.74	11.689	24.951	13.1	6/19/2017	13:05:06
1	32.75	11.689	24.956	12.44	6/19/2017	13:05:08
1	32.72	11.691	24.929	11.61	6/19/2017	13:05:10
1	32.73	11.7	24.932	10.98	6/19/2017	13:05:12
1	32.72	11.692	24.926	11.04	6/19/2017	13:05:14
1	32.71	11.705	24.91	9.82	6/19/2017	13:05:16
1	32.72	11.705	24.917	9.51	6/19/2017	13:05:18
1	32.71	11.7	24.908	9.1	6/19/2017	13:05:20
1	32.7	11.703	24.897	8.48	6/19/2017	13:05:22
1	32.71	11.71	24.9	7.61	6/19/2017	13:05:24
1	32.71	11.707	24.899	7.31	6/19/2017	13:05:26
1	32.71	11.709	24.897	7.06	6/19/2017	13:05:28
1	32.7	11.712	24.884	6.05	6/19/2017	13:05:30
1	32.7	11.71	24.882	5.55	6/19/2017	13:05:32
1	32.71	11.709	24.889	5.21	6/19/2017	13:05:34
1	32.7	11.716	24.877	4.58	6/19/2017	13:05:36
1	32.71	11.719	24.882	4.02	6/19/2017	13:05:38
1	32.7	11.716	24.872	3.5	6/19/2017	13:05:40
1	32.7	11.718	24.869	2.82	6/19/2017	13:05:42
1	32.69	11.72	24.859	2.44	6/19/2017	13:05:44
1	32.7	11.719	24.864	1.88	6/19/2017	13:05:46
1	32.7	11.716	24.861	1.12	6/19/2017	13:05:48
1	32.7	11.713	24.862	1.07	6/19/2017	13:06:00
1	32.7	11.717	24.861	1.18	6/19/2017	13:06:06
1	32.7	11.715	24.862	1.14	6/19/2017	13:06:12
1	32.69	11.718	24.853	1	6/19/2017	13:06:20
1	32.7	11.717	24.862	1.23	6/19/2017	13:06:26
1	32.69	11.718	24.853	1.11	6/19/2017	13:06:32
1	32.69	11.719	24.853	1.01	6/19/2017	13:06:38
1	32.71	11.718	24.869	1.24	6/19/2017	13:06:44
1	32.69	11.718	24.853	1.12	6/19/2017	13:06:50
1	32.69	11.718	24.853	1.1	6/19/2017	13:06:56
1	32.7	11.719	24.861	1.06	6/19/2017	13:07:16
1	32.69	11.724	24.852	1.01	6/19/2017	13:08:08
1	32.69	11.725	24.851	1	6/19/2017	13:08:16
1	32.7	11.734	24.858	1.02	6/19/2017	13:08:32
1	32.69	11.734	24.85	1.02	6/19/2017	13:08:38
1	32.69	11.732	24.85	1.06	6/19/2017	13:09:02
1	32.71	11.733	24.866	1.13	6/19/2017	13:09:08
1	32.69	11.733	24.85	1.1	6/19/2017	13:09:32
1	32.69	11.73	24.851	1.17	6/19/2017	13:09:38
1	32.68	11.73	24.843	1.1	6/19/2017	13:09:44
1	32.7	11.731	24.858	1.03	6/19/2017	13:09:50
1	32.68	11.73	24.844	1.21	6/19/2017	13:09:56
1	32.68	11.73	24.843	1.11	6/19/2017	13:10:04
1	32.72	11.728	24.876	1.3	6/19/2017	13:10:10
1	32.7	11.727	24.859	1.12	6/19/2017	13:10:16
1	32.7	11.728	24.859	1.02	6/19/2017	13:10:22
1	32.71	11.724	24.868	1.12	6/19/2017	13:10:54
1	32.71	11.721	24.868	1.03	6/19/2017	13:11:00
1	32.7	11.722	24.86	1.12	6/19/2017	13:11:06
1	32.7	11.724	24.859	1.01	6/19/2017	13:11:14
1	32.72	11.727	24.875	1.06	6/19/2017	13:11:20
1	32.7	11.728	24.859	1.12	6/19/2017	13:11:26
1	32.69	11.738	24.849	1.01	6/19/2017	13:11:48
1	32.71	11.741	24.864	1.1	6/19/2017	13:12:14
1	32.71	11.744	24.864	1.07	6/19/2017	13:12:38
1	32.69	11.744	24.848	1.04	6/19/2017	13:12:46
1	32.69	11.745	24.848	1	6/19/2017	13:12:54
1	32.69	11.742	24.849	1.17	6/19/2017	13:13:12
1	32.69	11.734	24.85	1.1	6/19/2017	13:13:18
1	32.69	11.738	24.849	1.02	6/19/2017	13:13:40
1	32.71	11.739	24.864	1.01	6/19/2017	13:13:42
1	32.69	11.74	24.849	1.13	6/19/2017	13:13:48
1	32.69	11.74	24.85	1.3	6/19/2017	13:13:54
1	32.69	11.74	24.849	1.13	6/19/2017	13:14:00
1	32.7	11.74	24.857	1.03	6/19/2017	13:14:20
1	32.71	11.74	24.865	1.08	6/19/2017	13:14:34
1	32.7	11.741	24.856	1	6/19/2017	13:14:48
1	32.71	11.74	24.866	1.5	6/19/2017	13:14:50
1	32.69	11.737	24.856	2.45	6/19/2017	13:14:52
1	32.69	11.735	24.859	3.13	6/19/2017	13:14:54
1	32.69	11.732	24.863	3.89	6/19/2017	13:14:56
1	32.72	11.731	24.888	4.2	6/19/2017	13:14:58
1	32.69	11.73	24.867	4.55	6/19/2017	13:15:00
1	32.73	11.727	24.899	4.74	6/19/2017	13:15:02
1	32.72	11.734	24.888	4.41	6/19/2017	13:15:04
1	32.71	11.731	24.884	5.02	6/19/2017	13:15:06
1	32.71	11.723	24.889	5.77	6/19/2017	13:15:08
1	32.7	11.724	24.881	5.9	6/19/2017	13:15:10
1	32.71	11.724	24.892	6.48	6/19/2017	13:15:12
1	32.71	11.715	24.898	7.52	6/19/2017	13:15:14
1	32.7	11.721	24.89	7.61	6/19/2017	13:15:16
1	32.72	11.723	24.907	8.12	6/19/2017	13:15:18
1	32.72	11.711	24.914	9.03	6/19/2017	13:15:20
1	32.72	11.711	24.915	9.43	6/19/2017	13:15:22
1	32.73	11.706	24.926	9.82	6/19/2017	13:15:24
1	32.74	11.703	24.937	10.45	6/19/2017	13:15:26
1	32.73	11.699	24.934	11.29	6/19/2017	13:15:28
1	32.72	11.699	24.927	11.51	6/19/2017	13:15:30
1	32.74	11.699	24.945	12.16	6/19/2017	13:15:32
1	32.74	11.698	24.95	13.04	6/19/2017	13:15:34
1	32.75	11.697	24.958	13.1	6/19/2017	13:15:36
1	32.73	11.697	24.946	14.04	6/19/2017	13:15:38
1	32.73	11.696	24.949	14.62	6/19/2017	13:15:40
1	32.72	11.693	24.944	15.07	6/19/2017	13:15:42
1	32.72	11.693	24.946	15.42	6/19/2017	13:15:44
1	32.72	11.691	24.95	16.27	6/19/2017	13:15:46
1	32.74	11.692	24.968	17	6/19/2017	13:15:48
1	32.74	11.692	24.968	16.82	6/19/2017	13:15:50
1	32.73	11.691	24.965	17.95	6/19/2017	13:15:52
1	32.76	11.689	24.992	18.6	6/19/2017	13:15:54
1	32.76	11.691	24.992	18.68	6/19/2017	13:15:56
1	32.74	11.691	24.98	19.43	6/19/2017	13:15:58
1	32.74	11.688	24.983	20.14	6/19/2017	13:16:00
1	32.75	11.687	24.994	20.68	6/19/2017	13:16:02
1	32.75	11.686	24.995	20.9	6/19/2017	13:16:04
1	32.74	11.687	24.99	21.56	6/19/2017	13:16:06
1	32.76	11.68	25.011	22.45	6/19/2017	13:16:08
1	32.75	11.68	25.003	22.52	6/19/2017	13:16:10
1	32.76	11.68	25.015	23.33	6/19/2017	13:16:12
1	32.75	11.676	25.011	24.14	6/19/2017	13:16:14
1	32.77	11.677	25.026	24.09	6/19/2017	13:16:16
1	32.75	11.678	25.014	24.83	6/19/2017	13:16:18
1	32.76	11.675	25.026	25.71	6/19/2017	13:16:20
1	32.76	11.674	25.027	25.89	6/19/2017	13:16:22
1	32.76	11.672	25.031	26.72	6/19/2017	13:16:24
1	32.76	11.673	25.033	26.99	6/19/2017	13:16:26
1	32.77	11.673	25.041	27.14	6/19/2017	13:16:28
1	32.76	11.673	25.039	28.37	6/19/2017	13:16:30
1	32.76	11.674	25.04	28.72	6/19/2017	13:16:32
1	32.76	11.674	25.041	28.89	6/19/2017	13:16:34
1	32.76	11.675	25.043	29.46	6/19/2017	13:16:36
1	32.77	11.671	25.054	29.95	6/19/2017	13:16:38
1	32.77	11.669	25.057	30.49	6/19/2017	13:16:40
1	32.76	11.669	25.052	31.23	6/19/2017	13:16:42
1	32.77	11.669	25.061	31.53	6/19/2017	13:16:44
1	32.74	11.67	25.039	31.73	6/19/2017	13:16:46
1	32.76	11.669	25.056	32.04	6/19/2017	13:16:48
1	32.77	11.668	25.069	33.09	6/19/2017	13:16:50
1	32.77	11.668	25.071	33.54	6/19/2017	13:16:52
1	32.76	11.669	25.061	33.25	6/19/2017	13:16:54
1	32.76	11.668	25.067	34.39	6/19/2017	13:16:56
1	32.76	11.668	25.067	34.51	6/19/2017	13:16:58
1	32.76	11.668	25.069	34.83	6/19/2017	13:17:00
1	32.77	11.668	25.08	35.61	6/19/2017	13:17:02
1	32.76	11.666	25.076	36.34	6/19/2017	13:17:04
1	32.76	11.666	25.074	35.95	6/19/2017	13:17:06
1	32.74	11.665	25.063	36.86	6/19/2017	13:17:08
1	32.77	11.664	25.089	37.36	6/19/2017	13:17:10
1	32.76	11.665	25.081	37.49	6/19/2017	13:17:12
1	32.76	11.663	25.086	38.36	6/19/2017	13:17:14
1	32.76	11.661	25.087	38.66	6/19/2017	13:17:16
1	32.77	11.661	25.097	39.04	6/19/2017	13:17:18
1	32.78	11.656	25.107	39.32	6/19/2017	13:17:20
1	32.77	11.656	25.101	39.72	6/19/2017	13:17:22
1	32.78	11.647	25.115	40.9	6/19/2017	13:17:24
1	32.78	11.651	25.112	40.31	6/19/2017	13:17:26
1	32.77	11.649	25.109	41.26	6/19/2017	13:17:28
1	32.82	11.648	25.15	41.75	6/19/2017	13:17:30
1	32.79	11.646	25.128	41.82	6/19/2017	13:17:32
1	32.81	11.65	25.147	42.77	6/19/2017	13:17:34
1	32.85	11.651	25.179	43.1	6/19/2017	13:17:36
1	32.82	11.65	25.157	43.27	6/19/2017	13:17:38
1	32.83	11.652	25.166	43.63	6/19/2017	13:17:40
1	32.85	11.65	25.186	44.6	6/19/2017	13:17:42
1	32.87	11.647	25.203	44.79	6/19/2017	13:17:44
1	32.87	11.646	25.203	44.84	6/19/2017	13:17:46
1	32.86	11.648	25.199	45.64	6/19/2017	13:17:48
1	32.87	11.647	25.21	46.38	6/19/2017	13:17:50
1	32.89	11.648	25.225	46.33	6/19/2017	13:17:52
1	32.88	11.647	25.22	46.78	6/19/2017	13:17:54
1	32.89	11.644	25.231	47.44	6/19/2017	13:17:56
1	32.92	11.633	25.258	47.91	6/19/2017	13:17:58
1	32.91	11.644	25.248	47.88	6/19/2017	13:18:00
1	32.92	11.619	25.266	49.03	6/19/2017	13:18:02
1	32.94	11.611	25.284	49.18	6/19/2017	13:18:04
1	32.92	11.623	25.266	49.27	6/19/2017	13:18:06
1	32.94	11.613	25.287	49.9	6/19/2017	13:18:08
1	33.03	11.494	25.38	50.35	6/19/2017	13:18:10
1	33.08	11.429	25.434	51.05	6/19/2017	13:18:12
1	33.11	11.407	25.461	50.99	6/19/2017	13:18:14
1	33.07	11.435	25.428	51.68	6/19/2017	13:18:16
1	33.12	11.382	25.478	51.92	6/19/2017	13:18:18
1	33.12	11.399	25.476	52.31	6/19/2017	13:18:20
1	33.23	11.275	25.589	53.24	6/19/2017	13:18:22
1	33.25	11.183	25.622	53.45	6/19/2017	13:18:24
1	33.23	11.22	25.6	53.46	6/19/2017	13:18:26
1	33.24	11.218	25.611	54.07	6/19/2017	13:18:28
1	33.33	11.077	25.709	54.83	6/19/2017	13:18:30
1	33.34	11.006	25.731	55.05	6/19/2017	13:18:32
1	33.31	11.051	25.701	55.29	6/19/2017	13:18:34
1	33.37	10.981	25.764	56.17	6/19/2017	13:18:36
1	33.44	10.861	25.841	56.47	6/19/2017	13:18:38
1	33.36	10.952	25.762	56.25	6/19/2017	13:18:40
1	33.46	10.826	25.867	57.38	6/19/2017	13:18:42
1	33.67	10.499	26.09	57.89	6/19/2017	13:18:44
1	33.51	10.701	25.93	57.89	6/19/2017	13:18:46
1	33.51	10.687	25.936	58.53	6/19/2017	13:18:48
1	33.54	10.675	25.962	58.66	6/19/2017	13:18:50
1	33.78	10.199	26.236	59.64	6/19/2017	13:18:52
1	33.79	10.122	26.258	59.83	6/19/2017	13:18:54
1	33.78	10.155	26.246	60.15	6/19/2017	13:18:56
1	33.79	10.145	26.258	60.69	6/19/2017	13:18:58
1	33.84	10.089	26.309	61.27	6/19/2017	13:19:00
1	33.82	10.082	26.295	61.36	6/19/2017	13:19:02
1	33.85	10.056	26.326	62.07	6/19/2017	13:19:04
1	33.84	10.034	26.325	62.74	6/19/2017	13:19:06
1	33.82	10.042	26.307	62.47	6/19/2017	13:19:08
1	33.82	10.043	26.308	62.77	6/19/2017	13:19:10
1	33.83	10.062	26.312	62.56	6/19/2017	13:19:12
1	33.8	10.116	26.279	62.61	6/19/2017	13:19:14
1	33.76	10.152	26.243	62.76	6/19/2017	13:19:16
1	33.78	10.17	26.255	62.71	6/19/2017	13:19:18
1	33.73	10.197	26.21	62.47	6/19/2017	13:19:20
1	33.76	10.187	26.235	62.4	6/19/2017	13:19:22
1	33.78	10.158	26.255	62.3	6/19/2017	13:19:24
1	33.81	10.124	26.286	62.75	6/19/2017	13:19:26
1	33.79	10.101	26.275	62.81	6/19/2017	13:19:28
1	33.81	10.099	26.288	62.29	6/19/2017	13:19:30
1	33.79	10.122	26.269	62.28	6/19/2017	13:19:32
1	33.79	10.109	26.274	62.93	6/19/2017	13:19:34
1	33.81	10.086	26.289	61.89	6/19/2017	13:19:36
1	33.83	10.038	26.311	61.59	6/19/2017	13:19:38
1	33.82	10.052	26.299	61.19	6/19/2017	13:19:40
1	33.8	10.081	26.274	60.22	6/19/2017	13:19:42
1	33.8	10.085	26.273	60.15	6/19/2017	13:19:44
1	33.79	10.091	26.262	59.58	6/19/2017	13:19:46
1	33.81	10.096	26.272	58.48	6/19/2017	13:19:48
1	33.8	10.098	26.263	58.43	6/19/2017	13:19:50
1	33.81	10.095	26.271	58.23	6/19/2017	13:19:52
1	33.45	10.566	25.903	57	6/19/2017	13:19:54
1	33.52	10.672	25.938	56.67	6/19/2017	13:19:56
1	33.72	10.399	26.141	56.53	6/19/2017	13:19:58
1	33.31	10.791	25.749	55.83	6/19/2017	13:20:00
1	33.36	10.947	25.757	55.06	6/19/2017	13:20:02
1	33.35	10.973	25.743	54.69	6/19/2017	13:20:04
1	33.33	10.982	25.724	54.39	6/19/2017	13:20:06
1	33.27	11.087	25.656	53.65	6/19/2017	13:20:08
1	33.26	11.145	25.635	53.07	6/19/2017	13:20:10
1	33.23	11.176	25.605	52.82	6/19/2017	13:20:12
1	33.17	11.328	25.525	51.66	6/19/2017	13:20:14
1	33.16	11.339	25.515	51.61	6/19/2017	13:20:16
1	33.21	11.241	25.572	51.61	6/19/2017	13:20:18
1	33.12	11.389	25.47	50.43	6/19/2017	13:20:20
1	33.03	11.495	25.375	49.26	6/19/2017	13:20:22
1	33.13	11.392	25.474	49.72	6/19/2017	13:20:24
1	33.11	11.411	25.455	49.66	6/19/2017	13:20:26
1	32.94	11.589	25.282	47.95	6/19/2017	13:20:28
1	32.93	11.613	25.268	47.6	6/19/2017	13:20:30
1	33.02	11.505	25.359	47.68	6/19/2017	13:20:32
1	32.92	11.635	25.252	46.53	6/19/2017	13:20:34
1	32.94	11.616	25.27	46.29	6/19/2017	13:20:36
1	32.91	11.635	25.241	45.78	6/19/2017	13:20:38
1	32.89	11.646	25.221	45.31	6/19/2017	13:20:40
1	32.88	11.645	25.21	44.47	6/19/2017	13:20:42
1	32.88	11.643	25.208	44.07	6/19/2017	13:20:44
1	32.88	11.646	25.205	43.53	6/19/2017	13:20:46
1	32.87	11.655	25.192	42.66	6/19/2017	13:20:48
1	32.85	11.65	25.178	42.88	6/19/2017	13:20:50
1	32.84	11.656	25.165	41.95	6/19/2017	13:20:52
1	32.82	11.649	25.147	41.06	6/19/2017	13:20:54
1	32.79	11.648	25.122	40.57	6/19/2017	13:20:56
1	32.79	11.65	25.122	40.74	6/19/2017	13:20:58
1	32.79	11.653	25.117	39.68	6/19/2017	13:21:00
1	32.76	11.655	25.089	38.73	6/19/2017	13:21:02
1	32.77	11.654	25.098	39.03	6/19/2017	13:21:04
1	32.77	11.66	25.092	38.03	6/19/2017	13:21:06
1	32.77	11.663	25.088	37.17	6/19/2017	13:21:08
1	32.77	11.656	25.09	37.42	6/19/2017	13:21:10
1	32.77	11.661	25.084	36.17	6/19/2017	13:21:12
1	32.76	11.661	25.074	35.72	6/19/2017	13:21:14
1	32.77	11.66	25.081	35.52	6/19/2017	13:21:16
1	32.77	11.662	25.077	34.7	6/19/2017	13:21:18
1	32.77	11.664	25.074	34.11	6/19/2017	13:21:20
1	32.76	11.662	25.066	33.91	6/19/2017	13:21:22
1	32.77	11.668	25.068	33.04	6/19/2017	13:21:24
1	32.77	11.668	25.066	32.46	6/19/2017	13:21:26
1	32.75	11.668	25.049	32.1	6/19/2017	13:21:28
1	32.76	11.668	25.055	31.84	6/19/2017	13:21:30
1	32.77	11.669	25.057	30.55	6/19/2017	13:21:32
1	32.75	11.668	25.043	30.74	6/19/2017	13:21:34
1	32.76	11.669	25.046	29.86	6/19/2017	13:21:36
1	32.76	11.671	25.042	28.99	6/19/2017	13:21:38
1	32.75	11.669	25.035	29.08	6/19/2017	13:21:40
1	32.76	11.672	25.038	28.07	6/19/2017	13:21:42
1	32.76	11.672	25.036	27.64	6/19/2017	13:21:44
1	32.73	11.671	25.011	27.25	6/19/2017	13:21:46
1	32.76	11.671	25.031	26.6	6/19/2017	13:21:48
1	32.76	11.672	25.027	25.62	6/19/2017	13:21:50
1	32.76	11.672	25.025	25.39	6/19/2017	13:21:52
1	32.75	11.672	25.018	25.44	6/19/2017	13:21:54
1	32.74	11.672	25.004	24.09	6/19/2017	13:21:56
1	32.76	11.672	25.016	23.18	6/19/2017	13:21:58
1	32.76	11.672	25.019	24.02	6/19/2017	13:22:00
1	32.75	11.674	25.004	22.33	6/19/2017	13:22:02
1	32.76	11.674	25.007	21.46	6/19/2017	13:22:04
1	32.76	11.673	25.011	22.19	6/19/2017	13:22:06
1	32.75	11.673	24.997	20.77	6/19/2017	13:22:08
1	32.75	11.679	24.991	19.65	6/19/2017	13:22:10
1	32.75	11.674	24.994	20.18	6/19/2017	13:22:12
1	32.75	11.674	24.991	19.46	6/19/2017	13:22:14
1	32.75	11.68	24.984	18.27	6/19/2017	13:22:16
1	32.75	11.68	24.983	17.97	6/19/2017	13:22:18
1	32.75	11.675	24.985	18.15	6/19/2017	13:22:20
1	32.74	11.692	24.966	16.48	6/19/2017	13:22:22
1	32.73	11.688	24.958	16.25	6/19/2017	13:22:24
1	32.74	11.686	24.967	16.42	6/19/2017	13:22:26
1	32.72	11.694	24.943	14.85	6/19/2017	13:22:28
1	32.72	11.693	24.942	14.6	6/19/2017	13:22:30
1	32.73	11.691	24.948	14.22	6/19/2017	13:22:32
1	32.74	11.693	24.952	13.42	6/19/2017	13:22:34
1	32.72	11.696	24.934	13	6/19/2017	13:22:36
1	32.73	11.701	24.938	12.43	6/19/2017	13:22:38
1	32.72	11.703	24.928	11.81	6/19/2017	13:22:40
1	32.72	11.704	24.925	11.33	6/19/2017	13:22:42
1	32.73	11.703	24.93	10.66	6/19/2017	13:22:44
1	32.72	11.708	24.919	10.23	6/19/2017	13:22:46
1	32.72	11.714	24.915	9.53	6/19/2017	13:22:48
1	32.72	11.722	24.912	9.12	6/19/2017	13:22:50
1	32.72	11.723	24.909	8.61	6/19/2017	13:22:52
1	32.7	11.721	24.89	7.71	6/19/2017	13:22:54
1	32.71	11.721	24.897	7.46	6/19/2017	13:22:56
1	32.72	11.721	24.903	7.01	6/19/2017	13:22:58
1	32.69	11.726	24.873	5.9	6/19/2017	13:23:00
1	32.72	11.725	24.897	5.84	6/19/2017	13:23:02
1	32.69	11.724	24.87	5.15	6/19/2017	13:23:04
1	32.69	11.735	24.865	4.43	6/19/2017	13:23:06
1	32.71	11.732	24.879	3.99	6/19/2017	13:23:08
1	32.71	11.736	24.877	3.59	6/19/2017	13:23:10
1	32.71	11.733	24.874	2.96	6/19/2017	13:23:12
1	32.69	11.729	24.856	2.18	6/19/2017	13:23:14
1	32.7	11.73	24.863	2.11	6/19/2017	13:23:16
1	32.71	11.734	24.867	1.28	6/19/2017	13:23:18
1	32.67	11.735	24.835	1.11	6/19/2017	13:23:22
1	32.7	11.734	24.858	1.13	6/19/2017	13:23:24
1	32.69	11.734	24.85	1.1	6/19/2017	13:23:28
1	32.7	11.735	24.857	1.01	6/19/2017	13:23:32
1	32.7	11.735	24.857	1.02	6/19/2017	13:23:36
1	32.7	11.737	24.857	1.04	6/19/2017	13:23:52
1	32.69	11.735	24.85	1.06	6/19/2017	13:23:58
2	32.6	11.766	24.775	1.13	6/19/2017	14:01:14
2	32.66	11.77	24.82	1	6/19/2017	14:01:40
2	32.68	11.761	24.837	1.04	6/19/2017	14:02:14
2	32.69	11.759	24.847	1.3	6/19/2017	14:02:50
2	32.68	11.759	24.839	1.41	6/19/2017	14:02:52
2	32.68	11.75	24.844	1.99	6/19/2017	14:02:56
2	32.71	11.741	24.874	3.24	6/19/2017	14:02:58
2	32.7	11.741	24.869	3.76	6/19/2017	14:03:00
2	32.71	11.747	24.877	4.05	6/19/2017	14:03:02
2	32.69	11.74	24.864	4.5	6/19/2017	14:03:04
2	32.7	11.741	24.873	4.69	6/19/2017	14:03:06
2	32.7	11.74	24.876	5.35	6/19/2017	14:03:08
2	32.72	11.728	24.902	7.06	6/19/2017	14:03:10
2	32.73	11.725	24.91	7.2	6/19/2017	14:03:12
2	32.72	11.722	24.908	8.26	6/19/2017	14:03:14
2	32.72	11.723	24.911	8.91	6/19/2017	14:03:16
2	32.72	11.724	24.91	8.69	6/19/2017	14:03:18
2	32.72	11.728	24.911	9.06	6/19/2017	14:03:20
2	32.74	11.714	24.933	10.09	6/19/2017	14:03:22
2	32.73	11.704	24.931	10.8	6/19/2017	14:03:24
2	32.73	11.709	24.931	11.14	6/19/2017	14:03:26
2	32.73	11.702	24.936	11.87	6/19/2017	14:03:28
2	32.73	11.701	24.939	12.66	6/19/2017	14:03:30
2	32.73	11.699	24.942	13.16	6/19/2017	14:03:32
2	32.73	11.697	24.945	13.77	6/19/2017	14:03:34
2	32.73	11.695	24.951	14.94	6/19/2017	14:03:36
2	32.73	11.695	24.95	14.79	6/19/2017	14:03:38
2	32.73	11.696	24.955	15.95	6/19/2017	14:03:40
2	32.74	11.696	24.966	16.61	6/19/2017	14:03:42
2	32.73	11.695	24.959	16.85	6/19/2017	14:03:44
2	32.74	11.696	24.972	17.94	6/19/2017	14:03:46
2	32.74	11.697	24.973	18.2	6/19/2017	14:03:48
2	32.75	11.696	24.984	18.93	6/19/2017	14:03:50
2	32.75	11.696	24.986	19.3	6/19/2017	14:03:52
2	32.74	11.695	24.981	19.8	6/19/2017	14:03:54
2	32.76	11.694	25.001	20.94	6/19/2017	14:03:56
2	32.74	11.695	24.984	20.67	6/19/2017	14:03:58
2	32.74	11.696	24.987	21.21	6/19/2017	14:04:00
2	32.74	11.696	24.992	22.32	6/19/2017	14:04:02
2	32.74	11.696	24.993	22.68	6/19/2017	14:04:04
2	32.74	11.696	24.993	22.5	6/19/2017	14:04:06
2	32.74	11.696	24.998	23.61	6/19/2017	14:04:08
2	32.74	11.696	25	24.18	6/19/2017	14:04:10
2	32.74	11.696	25.001	24.3	6/19/2017	14:04:12
2	32.74	11.696	25.004	24.97	6/19/2017	14:04:14
2	32.75	11.695	25.014	25.5	6/19/2017	14:04:16
2	32.75	11.694	25.015	25.76	6/19/2017	14:04:18
2	32.75	11.695	25.019	26.63	6/19/2017	14:04:20
2	32.75	11.695	25.021	27.15	6/19/2017	14:04:22
2	32.74	11.695	25.013	27.06	6/19/2017	14:04:24
2	32.76	11.692	25.034	28.16	6/19/2017	14:04:26
2	32.75	11.689	25.031	29.02	6/19/2017	14:04:28
2	32.75	11.688	25.03	28.75	6/19/2017	14:04:30
2	32.76	11.69	25.041	29.59	6/19/2017	14:04:32
2	32.74	11.69	25.031	30.79	6/19/2017	14:04:34
2	32.75	11.688	25.038	30.57	6/19/2017	14:04:36
2	32.74	11.688	25.034	31.33	6/19/2017	14:04:38
2	32.75	11.685	25.045	32.01	6/19/2017	14:04:40
2	32.75	11.685	25.047	32.52	6/19/2017	14:04:42
2	32.76	11.686	25.057	33.03	6/19/2017	14:04:44
2	32.76	11.685	25.06	33.63	6/19/2017	14:04:46
2	32.76	11.681	25.063	34.03	6/19/2017	14:04:48
2	32.75	11.684	25.057	34.66	6/19/2017	14:04:50
2	32.75	11.683	25.061	35.38	6/19/2017	14:04:52
2	32.74	11.682	25.054	35.66	6/19/2017	14:04:54
2	32.75	11.682	25.064	36.02	6/19/2017	14:04:56
2	32.76	11.676	25.078	37.12	6/19/2017	14:04:58
2	32.75	11.671	25.072	37.48	6/19/2017	14:05:00
2	32.75	11.675	25.073	37.75	6/19/2017	14:05:02
2	32.75	11.67	25.076	38.22	6/19/2017	14:05:04
2	32.76	11.667	25.089	39.38	6/19/2017	14:05:06
2	32.76	11.666	25.09	39.47	6/19/2017	14:05:08
2	32.76	11.667	25.092	39.91	6/19/2017	14:05:10
2	32.76	11.667	25.096	40.82	6/19/2017	14:05:12
2	32.77	11.667	25.104	40.92	6/19/2017	14:05:14
2	32.77	11.668	25.108	41.78	6/19/2017	14:05:16
2	32.76	11.67	25.102	42.21	6/19/2017	14:05:18
2	32.77	11.671	25.111	42.56	6/19/2017	14:05:20
2	32.75	11.67	25.099	43.45	6/19/2017	14:05:22
2	32.8	11.669	25.139	43.67	6/19/2017	14:05:24
2	32.8	11.669	25.142	44.27	6/19/2017	14:05:26
2	32.82	11.667	25.16	44.77	6/19/2017	14:05:28
2	32.8	11.663	25.148	45.27	6/19/2017	14:05:30
2	32.83	11.662	25.174	45.79	6/19/2017	14:05:32
2	32.82	11.661	25.169	46.52	6/19/2017	14:05:34
2	32.84	11.659	25.187	47	6/19/2017	14:05:36
2	32.83	11.66	25.179	46.89	6/19/2017	14:05:38
2	32.84	11.659	25.193	48.15	6/19/2017	14:05:40
2	32.84	11.657	25.195	48.58	6/19/2017	14:05:42
2	32.84	11.658	25.195	48.58	6/19/2017	14:05:44
2	32.88	11.632	25.236	49.75	6/19/2017	14:05:46
2	32.92	11.615	25.27	49.84	6/19/2017	14:05:48
2	32.86	11.632	25.222	50.18	6/19/2017	14:05:50
2	33	11.52	25.356	51.11	6/19/2017	14:05:52
2	33.04	11.458	25.4	51.54	6/19/2017	14:05:54
2	33.05	11.463	25.407	51.55	6/19/2017	14:05:56
2	33.16	11.352	25.517	52.5	6/19/2017	14:05:58
2	33.17	11.308	25.535	52.98	6/19/2017	14:06:00
2	33.11	11.378	25.477	53.26	6/19/2017	14:06:02
2	33.25	11.186	25.622	53.69	6/19/2017	14:06:04
2	33.37	10.98	25.756	54.41	6/19/2017	14:06:06
2	33.43	10.865	25.826	54.94	6/19/2017	14:06:08
2	33.44	10.827	25.842	55.4	6/19/2017	14:06:10
2	33.38	10.864	25.789	55.43	6/19/2017	14:06:12
2	33.55	10.72	25.951	56.37	6/19/2017	14:06:14
2	33.52	10.639	25.945	57.05	6/19/2017	14:06:16
2	33.5	10.652	25.927	56.95	6/19/2017	14:06:18
2	33.51	10.661	25.937	57.82	6/19/2017	14:06:20
2	33.6	10.544	26.031	58.47	6/19/2017	14:06:22
2	33.52	10.613	25.955	58.31	6/19/2017	14:06:24
2	33.54	10.62	25.973	59.01	6/19/2017	14:06:26
2	33.68	10.368	26.131	60.2	6/19/2017	14:06:28
2	33.64	10.358	26.101	59.95	6/19/2017	14:06:30
2	33.64	10.388	26.097	60.26	6/19/2017	14:06:32
2	33.64	10.378	26.1	60.64	6/19/2017	14:06:34
2	33.59	10.488	26.04	60.07	6/19/2017	14:06:36
2	33.64	10.448	26.089	60.78	6/19/2017	14:06:38
2	33.58	10.448	26.041	60.42	6/19/2017	14:06:40
2	33.57	10.502	26.022	60.22	6/19/2017	14:06:42
2	33.67	10.386	26.123	60.7	6/19/2017	14:06:44
2	33.66	10.377	26.116	60.52	6/19/2017	14:06:46
2	33.54	10.456	26.006	59.92	6/19/2017	14:06:48
2	33.62	10.37	26.085	60.45	6/19/2017	14:06:50
2	33.68	10.331	26.138	60.26	6/19/2017	14:06:52
2	33.67	10.359	26.12	59.05	6/19/2017	14:06:54
2	33.64	10.387	26.089	58.52	6/19/2017	14:06:56
2	33.64	10.363	26.094	58.56	6/19/2017	14:06:58
2	33.63	10.376	26.081	58.02	6/19/2017	14:07:00
2	33.54	10.527	25.981	57.19	6/19/2017	14:07:02
2	33.53	10.583	25.961	56.63	6/19/2017	14:07:04
2	33.56	10.557	25.988	56.55	6/19/2017	14:07:06
2	33.51	10.621	25.935	55.86	6/19/2017	14:07:08
2	33.49	10.656	25.91	55.13	6/19/2017	14:07:10
2	33.52	10.656	25.933	54.95	6/19/2017	14:07:12
2	33.44	10.714	25.858	54.56	6/19/2017	14:07:14
2	33.43	10.787	25.833	53.5	6/19/2017	14:07:16
2	33.4	10.857	25.795	53.06	6/19/2017	14:07:18
2	33.49	10.737	25.888	53.34	6/19/2017	14:07:20
2	33.22	11.051	25.617	52.26	6/19/2017	14:07:22
2	33.13	11.355	25.488	51.36	6/19/2017	14:07:24
2	33.3	11.145	25.658	51.23	6/19/2017	14:07:26
2	33.28	11.161	25.637	50.79	6/19/2017	14:07:28
2	33.09	11.42	25.44	50.23	6/19/2017	14:07:30
2	33.04	11.481	25.388	49.85	6/19/2017	14:07:32
2	32.98	11.55	25.326	49.23	6/19/2017	14:07:34
2	32.86	11.641	25.213	48.47	6/19/2017	14:07:36
2	32.85	11.655	25.201	48.06	6/19/2017	14:07:38
2	32.85	11.647	25.202	48.08	6/19/2017	14:07:40
2	32.85	11.656	25.197	47.25	6/19/2017	14:07:42
2	32.84	11.659	25.185	46.47	6/19/2017	14:07:44
2	32.85	11.659	25.191	46.11	6/19/2017	14:07:46
2	32.84	11.659	25.181	45.51	6/19/2017	14:07:48
2	32.82	11.659	25.164	45.36	6/19/2017	14:07:50
2	32.81	11.66	25.153	44.51	6/19/2017	14:07:52
2	32.82	11.663	25.157	43.82	6/19/2017	14:07:54
2	32.83	11.662	25.164	43.74	6/19/2017	14:07:56
2	32.81	11.667	25.144	42.8	6/19/2017	14:07:58
2	32.79	11.667	25.126	42.33	6/19/2017	14:08:00
2	32.8	11.667	25.133	42.11	6/19/2017	14:08:02
2	32.78	11.67	25.113	41.29	6/19/2017	14:08:04
2	32.77	11.67	25.104	40.99	6/19/2017	14:08:06
2	32.77	11.668	25.102	40.38	6/19/2017	14:08:08
2	32.76	11.666	25.091	39.61	6/19/2017	14:08:10
2	32.76	11.666	25.089	39.32	6/19/2017	14:08:12
2	32.77	11.666	25.095	38.78	6/19/2017	14:08:14
2	32.77	11.667	25.093	38.42	6/19/2017	14:08:16
2	32.76	11.666	25.082	37.7	6/19/2017	14:08:18
2	32.76	11.674	25.077	36.9	6/19/2017	14:08:20
2	32.76	11.673	25.076	36.72	6/19/2017	14:08:22
2	32.76	11.674	25.075	36.41	6/19/2017	14:08:24
2	32.77	11.674	25.078	35.5	6/19/2017	14:08:26
2	32.77	11.675	25.075	34.84	6/19/2017	14:08:28
2	32.75	11.676	25.059	34.81	6/19/2017	14:08:30
2	32.76	11.675	25.063	33.9	6/19/2017	14:08:32
2	32.77	11.682	25.066	33.07	6/19/2017	14:08:34
2	32.75	11.677	25.052	33.21	6/19/2017	14:08:36
2	32.76	11.682	25.057	32.76	6/19/2017	14:08:38
2	32.75	11.699	25.04	31.46	6/19/2017	14:08:40
2	32.75	11.699	25.038	31.08	6/19/2017	14:08:42
2	32.76	11.693	25.048	31.14	6/19/2017	14:08:44
2	32.76	11.692	25.045	30.55	6/19/2017	14:08:46
2	32.76	11.692	25.04	29.51	6/19/2017	14:08:48
2	32.76	11.691	25.039	29.07	6/19/2017	14:08:50
2	32.75	11.694	25.029	28.83	6/19/2017	14:08:52
2	32.73	11.697	25.011	28.33	6/19/2017	14:08:54
2	32.76	11.695	25.03	27.42	6/19/2017	14:08:56
2	32.75	11.696	25.021	27.14	6/19/2017	14:08:58
2	32.75	11.698	25.019	26.67	6/19/2017	14:09:00
2	32.75	11.698	25.015	25.85	6/19/2017	14:09:02
2	32.75	11.698	25.013	25.42	6/19/2017	14:09:04
2	32.73	11.697	24.996	25.1	6/19/2017	14:09:06
2	32.75	11.698	25.008	24.35	6/19/2017	14:09:08
2	32.73	11.698	24.991	23.87	6/19/2017	14:09:10
2	32.73	11.698	24.989	23.53	6/19/2017	14:09:12
2	32.75	11.698	25.001	22.76	6/19/2017	14:09:14
2	32.73	11.703	24.981	21.91	6/19/2017	14:09:16
2	32.75	11.699	24.998	22.15	6/19/2017	14:09:18
2	32.75	11.701	24.994	21.35	6/19/2017	14:09:20
2	32.74	11.702	24.981	20.24	6/19/2017	14:09:22
2	32.74	11.702	24.981	20.1	6/19/2017	14:09:24
2	32.73	11.702	24.972	19.93	6/19/2017	14:09:26
2	32.74	11.703	24.976	19.19	6/19/2017	14:09:28
2	32.74	11.703	24.971	18.08	6/19/2017	14:09:30
2	32.73	11.704	24.964	18.13	6/19/2017	14:09:32
2	32.75	11.703	24.979	17.98	6/19/2017	14:09:34
2	32.73	11.702	24.955	16.25	6/19/2017	14:09:36
2	32.73	11.703	24.957	16.65	6/19/2017	14:09:38
2	32.73	11.704	24.954	16.08	6/19/2017	14:09:40
2	32.73	11.704	24.948	14.73	6/19/2017	14:09:42
2	32.74	11.706	24.957	15.05	6/19/2017	14:09:44
2	32.73	11.707	24.946	14.34	6/19/2017	14:09:46
2	32.73	11.704	24.941	13.05	6/19/2017	14:09:48
2	32.73	11.704	24.942	13.31	6/19/2017	14:09:50
2	32.74	11.706	24.948	13	6/19/2017	14:09:52
2	32.72	11.708	24.924	11.33	6/19/2017	14:09:54
2	32.74	11.708	24.94	11.27	6/19/2017	14:09:56
2	32.73	11.704	24.935	11.68	6/19/2017	14:09:58
2	32.73	11.704	24.93	10.77	6/19/2017	14:10:00
2	32.73	11.705	24.929	10.53	6/19/2017	14:10:02
2	32.71	11.705	24.919	11.68	6/19/2017	14:10:04
2	32.72	11.709	24.921	10.7	6/19/2017	14:10:06
2	32.71	11.712	24.911	10.24	6/19/2017	14:10:08
2	32.74	11.707	24.936	10.36	6/19/2017	14:10:10
2	32.73	11.707	24.923	9.29	6/19/2017	14:10:12
2	32.72	11.71	24.912	8.61	6/19/2017	14:10:14
2	32.71	11.708	24.904	8.53	6/19/2017	14:10:16
2	32.72	11.704	24.91	7.95	6/19/2017	14:10:18
2	32.71	11.723	24.894	6.95	6/19/2017	14:10:20
2	32.71	11.723	24.892	6.57	6/19/2017	14:10:22
2	32.72	11.719	24.901	6.49	6/19/2017	14:10:24
2	32.72	11.723	24.895	5.44	6/19/2017	14:10:26
2	32.7	11.728	24.876	4.85	6/19/2017	14:10:28
2	32.7	11.724	24.876	4.77	6/19/2017	14:10:30
2	32.7	11.73	24.871	3.93	6/19/2017	14:10:32
2	32.7	11.731	24.869	3.35	6/19/2017	14:10:34
2	32.69	11.731	24.86	3.13	6/19/2017	14:10:36
2	32.7	11.73	24.864	2.34	6/19/2017	14:10:38
2	32.69	11.746	24.851	1.71	6/19/2017	14:10:40
2	32.69	11.748	24.849	1.44	6/19/2017	14:10:42
2	32.72	11.735	24.876	1.75	6/19/2017	14:10:44
2	32.7	11.74	24.858	1.36	6/19/2017	14:10:48
2	32.7	11.743	24.857	1.18	6/19/2017	14:10:56
2	32.68	11.748	24.839	1.01	6/19/2017	14:11:02
2	32.69	11.742	24.849	1.22	6/19/2017	14:11:08
2	32.69	11.742	24.849	1.06	6/19/2017	14:11:16
2	32.69	11.74	24.849	1	6/19/2017	14:11:18
2	32.71	11.739	24.865	1.05	6/19/2017	14:11:24
2	32.69	11.742	24.849	1.1	6/19/2017	14:11:30
2	32.7	11.741	24.856	1.04	6/19/2017	14:11:34
2	32.69	11.74	24.855	2.36	6/19/2017	14:11:36
2	32.7	11.733	24.866	2.83	6/19/2017	14:11:38
2	32.69	11.737	24.858	2.85	6/19/2017	14:11:40
2	32.71	11.737	24.875	3.34	6/19/2017	14:11:42
2	32.72	11.734	24.886	3.79	6/19/2017	14:11:44
2	32.71	11.732	24.879	3.89	6/19/2017	14:11:46
2	32.7	11.729	24.874	4.44	6/19/2017	14:11:48
2	32.72	11.727	24.893	5.03	6/19/2017	14:11:50
2	32.71	11.729	24.885	5.22	6/19/2017	14:11:52
2	32.73	11.73	24.903	5.76	6/19/2017	14:11:54
2	32.71	11.729	24.889	6.09	6/19/2017	14:11:56
2	32.73	11.726	24.908	6.67	6/19/2017	14:11:58
2	32.74	11.725	24.917	6.84	6/19/2017	14:12:00
2	32.73	11.722	24.911	7.29	6/19/2017	14:12:02
2	32.73	11.72	24.915	8.01	6/19/2017	14:12:04
2	32.72	11.717	24.908	8.06	6/19/2017	14:12:06
2	32.71	11.721	24.901	8.31	6/19/2017	14:12:08
2	32.74	11.71	24.93	9.2	6/19/2017	14:12:10
2	32.73	11.705	24.925	9.51	6/19/2017	14:12:12
2	32.72	11.713	24.914	9.25	6/19/2017	14:12:14
2	32.73	11.707	24.928	10.28	6/19/2017	14:12:16
2	32.74	11.705	24.937	10.59	6/19/2017	14:12:18
2	32.73	11.706	24.93	10.85	6/19/2017	14:12:20
2	32.74	11.708	24.938	10.91	6/19/2017	14:12:22
2	32.72	11.707	24.927	11.79	6/19/2017	14:12:24
2	32.74	11.707	24.943	12.05	6/19/2017	14:12:26
2	32.74	11.708	24.944	12.15	6/19/2017	14:12:28
2	32.74	11.705	24.948	12.91	6/19/2017	14:12:30
2	32.72	11.706	24.931	12.62	6/19/2017	14:12:32
2	32.73	11.704	24.942	13.27	6/19/2017	14:12:34
2	32.73	11.7	24.946	13.96	6/19/2017	14:12:36
2	32.72	11.701	24.937	13.83	6/19/2017	14:12:38
2	32.75	11.701	24.964	14.56	6/19/2017	14:12:40
2	32.74	11.701	24.957	14.92	6/19/2017	14:12:42
2	32.74	11.701	24.957	14.91	6/19/2017	14:12:44
2	32.74	11.7	24.961	15.78	6/19/2017	14:12:46
2	32.75	11.698	24.972	16.28	6/19/2017	14:12:48
2	32.74	11.698	24.966	16.65	6/19/2017	14:12:50
2	32.74	11.7	24.966	16.74	6/19/2017	14:12:52
2	32.75	11.698	24.977	17.48	6/19/2017	14:12:54
2	32.75	11.698	24.98	18.02	6/19/2017	14:12:56
2	32.74	11.698	24.973	18.24	6/19/2017	14:12:58
2	32.75	11.698	24.982	18.61	6/19/2017	14:13:00
2	32.74	11.698	24.978	19.31	6/19/2017	14:13:02
2	32.74	11.698	24.979	19.59	6/19/2017	14:13:04
2	32.74	11.699	24.981	19.97	6/19/2017	14:13:06
2	32.76	11.698	24.999	20.5	6/19/2017	14:13:08
2	32.74	11.699	24.986	21.13	6/19/2017	14:13:10
2	32.75	11.699	24.993	20.95	6/19/2017	14:13:12
2	32.75	11.699	24.997	21.82	6/19/2017	14:13:14
2	32.74	11.697	24.992	22.34	6/19/2017	14:13:16
2	32.75	11.699	24.999	22.45	6/19/2017	14:13:18
2	32.75	11.697	25.002	22.9	6/19/2017	14:13:20
2	32.75	11.695	25.004	23.39	6/19/2017	14:13:22
2	32.76	11.696	25.015	23.98	6/19/2017	14:13:24
2	32.75	11.697	25.007	24.06	6/19/2017	14:13:26
2	32.75	11.696	25.01	24.62	6/19/2017	14:13:28
2	32.75	11.697	25.011	24.92	6/19/2017	14:13:30
2	32.74	11.697	25.006	25.48	6/19/2017	14:13:32
2	32.75	11.696	25.014	25.61	6/19/2017	14:13:34
2	32.74	11.696	25.009	26.19	6/19/2017	14:13:36
2	32.74	11.697	25.011	26.65	6/19/2017	14:13:38
2	32.74	11.698	25.012	26.85	6/19/2017	14:13:40
2	32.77	11.698	25.037	27.23	6/19/2017	14:13:42
2	32.76	11.698	25.032	27.92	6/19/2017	14:13:44
2	32.75	11.698	25.024	27.92	6/19/2017	14:13:46
2	32.74	11.697	25.019	28.34	6/19/2017	14:13:48
2	32.76	11.687	25.04	29.19	6/19/2017	14:13:50
2	32.76	11.686	25.039	28.94	6/19/2017	14:13:52
2	32.76	11.684	25.042	29.45	6/19/2017	14:13:54
2	32.76	11.681	25.047	30.49	6/19/2017	14:13:56
2	32.75	11.684	25.036	29.97	6/19/2017	14:13:58
2	32.76	11.682	25.046	30.46	6/19/2017	14:14:00
2	32.76	11.682	25.052	31.64	6/19/2017	14:14:02
2	32.76	11.682	25.05	31.27	6/19/2017	14:14:04
2	32.75	11.682	25.043	31.33	6/19/2017	14:14:06
2	32.75	11.681	25.047	32.32	6/19/2017	14:14:08
2	32.76	11.682	25.054	32.12	6/19/2017	14:14:10
2	32.76	11.682	25.055	32.4	6/19/2017	14:14:12
2	32.76	11.683	25.059	33.25	6/19/2017	14:14:14
2	32.77	11.683	25.067	33.42	6/19/2017	14:14:16
2	32.75	11.683	25.052	33.36	6/19/2017	14:14:18
2	32.75	11.686	25.055	34.24	6/19/2017	14:14:20
2	32.76	11.685	25.064	34.48	6/19/2017	14:14:22
2	32.76	11.685	25.066	34.81	6/19/2017	14:14:24
2	32.76	11.683	25.069	35.6	6/19/2017	14:14:26
2	32.76	11.683	25.069	35.54	6/19/2017	14:14:28
2	32.75	11.684	25.063	35.9	6/19/2017	14:14:30
2	32.76	11.682	25.074	36.49	6/19/2017	14:14:32
2	32.76	11.674	25.079	37.43	6/19/2017	14:14:34
2	32.76	11.676	25.077	37.02	6/19/2017	14:14:36
2	32.76	11.676	25.081	37.9	6/19/2017	14:14:38
2	32.76	11.671	25.084	38.43	6/19/2017	14:14:40
2	32.76	11.673	25.084	38.47	6/19/2017	14:14:42
2	32.77	11.67	25.097	39.54	6/19/2017	14:14:44
2	32.77	11.668	25.1	40.11	6/19/2017	14:14:46
2	32.76	11.667	25.095	40.53	6/19/2017	14:14:48
2	32.76	11.667	25.095	40.68	6/19/2017	14:14:50
2	32.76	11.667	25.099	41.52	6/19/2017	14:14:52
2	32.77	11.667	25.111	42.54	6/19/2017	14:14:54
2	32.77	11.668	25.112	42.69	6/19/2017	14:14:56
2	32.76	11.669	25.105	42.85	6/19/2017	14:14:58
2	32.77	11.67	25.116	43.75	6/19/2017	14:15:00
2	32.81	11.665	25.153	44.78	6/19/2017	14:15:02
2	32.81	11.666	25.152	44.6	6/19/2017	14:15:04
2	32.81	11.666	25.154	45.11	6/19/2017	14:15:06
2	32.84	11.661	25.185	46.56	6/19/2017	14:15:08
2	32.85	11.661	25.193	46.64	6/19/2017	14:15:10
2	32.85	11.661	25.193	46.63	6/19/2017	14:15:12
2	32.84	11.659	25.192	47.94	6/19/2017	14:15:14
2	32.86	11.654	25.211	48.5	6/19/2017	14:15:16
2	32.86	11.65	25.21	48.31	6/19/2017	14:15:18
2	32.91	11.593	25.265	49.5	6/19/2017	14:15:20
2	33	11.522	25.351	50.25	6/19/2017	14:15:22
2	32.96	11.553	25.313	49.92	6/19/2017	14:15:24
2	33	11.519	25.355	50.96	6/19/2017	14:15:26
2	33.12	11.414	25.472	51.83	6/19/2017	14:15:28
2	33.05	11.475	25.406	51.73	6/19/2017	14:15:30
2	33.24	11.259	25.597	52.71	6/19/2017	14:15:32
2	33.34	11.065	25.713	53.45	6/19/2017	14:15:34
2	33.27	11.127	25.648	53.51	6/19/2017	14:15:36
2	33.25	11.187	25.624	54.08	6/19/2017	14:15:38
2	33.44	10.898	25.828	55.05	6/19/2017	14:15:40
2	33.46	10.834	25.857	55.4	6/19/2017	14:15:42
2	33.42	10.858	25.822	55.62	6/19/2017	14:15:44
2	33.52	10.747	25.924	56.52	6/19/2017	14:15:46
2	33.54	10.634	25.963	57.38	6/19/2017	14:15:48
2	33.51	10.639	25.938	57.23	6/19/2017	14:15:50
2	33.51	10.654	25.938	57.76	6/19/2017	14:15:52
2	33.57	10.565	26.006	59	6/19/2017	14:15:54
2	33.55	10.549	25.993	58.98	6/19/2017	14:15:56
2	33.6	10.508	26.044	60.03	6/19/2017	14:15:58
2	33.53	10.517	25.988	60.16	6/19/2017	14:16:00
2	33.53	10.597	25.973	59.77	6/19/2017	14:16:02
2	33.62	10.491	26.066	60.75	6/19/2017	14:16:04
2	33.55	10.538	26.001	60.25	6/19/2017	14:16:06
2	33.56	10.561	26.004	60.26	6/19/2017	14:16:08
2	33.61	10.498	26.055	60.44	6/19/2017	14:16:10
2	33.57	10.514	26.02	60.26	6/19/2017	14:16:12
2	33.64	10.442	26.083	59.31	6/19/2017	14:16:14
2	33.57	10.483	26.023	59.55	6/19/2017	14:16:16
2	33.6	10.465	26.046	58.84	6/19/2017	14:16:18
2	33.57	10.503	26.012	58.04	6/19/2017	14:16:20
2	33.58	10.507	26.018	57.81	6/19/2017	14:16:22
2	33.57	10.524	26.006	57.35	6/19/2017	14:16:24
2	33.54	10.571	25.971	56.67	6/19/2017	14:16:26
2	33.55	10.595	25.972	56.12	6/19/2017	14:16:28
2	33.53	10.605	25.953	55.8	6/19/2017	14:16:30
2	33.52	10.62	25.942	55.52	6/19/2017	14:16:32
2	33.45	10.761	25.858	54.54	6/19/2017	14:16:34
2	33.47	10.782	25.868	54.18	6/19/2017	14:16:36
2	33.49	10.751	25.888	53.9	6/19/2017	14:16:38
2	33.45	10.795	25.847	53.37	6/19/2017	14:16:40
2	33.38	10.921	25.765	52.44	6/19/2017	14:16:42
2	33.38	10.932	25.763	52.23	6/19/2017	14:16:44
2	33.41	10.882	25.794	52.03	6/19/2017	14:16:46
2	33.09	11.398	25.448	51.09	6/19/2017	14:16:48
2	33.06	11.456	25.412	50.64	6/19/2017	14:16:50
2	33.28	11.216	25.626	50.6	6/19/2017	14:16:52
2	33.04	11.472	25.389	49.66	6/19/2017	14:16:54
2	32.94	11.575	25.29	49.17	6/19/2017	14:16:56
2	32.95	11.568	25.298	48.82	6/19/2017	14:16:58
2	32.87	11.644	25.219	48.25	6/19/2017	14:17:00
2	32.87	11.654	25.216	47.92	6/19/2017	14:17:02
2	32.86	11.658	25.205	47.38	6/19/2017	14:17:04
2	32.85	11.66	25.192	46.44	6/19/2017	14:17:06
2	32.85	11.658	25.193	46.52	6/19/2017	14:17:08
2	32.84	11.66	25.181	45.63	6/19/2017	14:17:10
2	32.84	11.661	25.179	45.29	6/19/2017	14:17:12
2	32.84	11.662	25.177	44.79	6/19/2017	14:17:14
2	32.81	11.666	25.149	43.93	6/19/2017	14:17:16
2	32.8	11.664	25.142	43.92	6/19/2017	14:17:18
2	32.8	11.669	25.137	43.1	6/19/2017	14:17:20
2	32.79	11.67	25.127	42.72	6/19/2017	14:17:22
2	32.77	11.669	25.109	42.09	6/19/2017	14:17:24
2	32.78	11.669	25.116	41.88	6/19/2017	14:17:26
2	32.76	11.666	25.097	40.95	6/19/2017	14:17:28
2	32.76	11.666	25.094	40.33	6/19/2017	14:17:30
2	32.76	11.666	25.095	40.53	6/19/2017	14:17:32
2	32.75	11.682	25.08	39.55	6/19/2017	14:17:34
2	32.76	11.688	25.084	38.98	6/19/2017	14:17:36
2	32.77	11.687	25.09	38.5	6/19/2017	14:17:38
2	32.76	11.689	25.08	38.1	6/19/2017	14:17:40
2	32.76	11.689	25.078	37.82	6/19/2017	14:17:42
2	32.76	11.689	25.073	36.6	6/19/2017	14:17:44
2	32.75	11.687	25.064	36.32	6/19/2017	14:17:46
2	32.76	11.689	25.072	36.49	6/19/2017	14:17:48
2	32.75	11.688	25.059	35.2	6/19/2017	14:17:50
2	32.76	11.685	25.063	34.35	6/19/2017	14:17:52
2	32.74	11.689	25.05	35.03	6/19/2017	14:17:54
2	32.75	11.687	25.053	33.76	6/19/2017	14:17:56
2	32.76	11.687	25.057	32.89	6/19/2017	14:17:58
2	32.74	11.687	25.041	32.92	6/19/2017	14:18:00
2	32.76	11.687	25.055	32.55	6/19/2017	14:18:02
2	32.75	11.688	25.042	31.43	6/19/2017	14:18:04
2	32.74	11.687	25.034	31.36	6/19/2017	14:18:06
2	32.74	11.687	25.031	30.76	6/19/2017	14:18:08
2	32.75	11.691	25.035	30.01	6/19/2017	14:18:10
2	32.76	11.689	25.042	29.76	6/19/2017	14:18:12
2	32.74	11.693	25.023	29.12	6/19/2017	14:18:14
2	32.77	11.693	25.044	28.63	6/19/2017	14:18:16
2	32.76	11.693	25.034	28.07	6/19/2017	14:18:18
2	32.76	11.69	25.032	27.57	6/19/2017	14:18:20
2	32.74	11.69	25.014	26.95	6/19/2017	14:18:22
2	32.75	11.691	25.02	26.62	6/19/2017	14:18:24
2	32.77	11.691	25.031	25.74	6/19/2017	14:18:26
2	32.75	11.697	25.013	25.35	6/19/2017	14:18:28
2	32.75	11.699	25.012	25.18	6/19/2017	14:18:30
2	32.72	11.706	24.984	24.4	6/19/2017	14:18:32
2	32.76	11.695	25.011	23.22	6/19/2017	14:18:34
2	32.74	11.701	24.996	23.53	6/19/2017	14:18:36
2	32.75	11.701	25.002	23.17	6/19/2017	14:18:38
2	32.72	11.712	24.972	21.99	6/19/2017	14:18:40
2	32.76	11.713	25	21.47	6/19/2017	14:18:42
2	32.75	11.708	24.994	21.54	6/19/2017	14:18:44
2	32.74	11.711	24.983	20.94	6/19/2017	14:18:46
2	32.75	11.713	24.985	19.77	6/19/2017	14:18:48
2	32.76	11.712	24.992	19.65	6/19/2017	14:18:50
2	32.76	11.711	24.992	19.59	6/19/2017	14:18:52
2	32.75	11.712	24.978	18.29	6/19/2017	14:18:54
2	32.74	11.712	24.969	17.96	6/19/2017	14:18:56
2	32.74	11.711	24.97	18.01	6/19/2017	14:18:58
2	32.73	11.71	24.956	16.6	6/19/2017	14:19:00
2	32.73	11.712	24.955	16.56	6/19/2017	14:19:02
2	32.73	11.712	24.953	16.2	6/19/2017	14:19:04
2	32.72	11.711	24.941	15.23	6/19/2017	14:19:06
2	32.74	11.711	24.956	15.02	6/19/2017	14:19:08
2	32.73	11.716	24.944	14.22	6/19/2017	14:19:10
2	32.76	11.714	24.966	13.92	6/19/2017	14:19:12
2	32.74	11.714	24.948	13.39	6/19/2017	14:19:14
2	32.72	11.715	24.929	12.68	6/19/2017	14:19:16
2	32.75	11.717	24.95	12.25	6/19/2017	14:19:18
2	32.71	11.719	24.917	11.89	6/19/2017	14:19:20
2	32.74	11.721	24.936	11	6/19/2017	14:19:22
2	32.71	11.722	24.911	10.63	6/19/2017	14:19:24
2	32.73	11.721	24.925	10.26	6/19/2017	14:19:26
2	32.72	11.72	24.914	9.6	6/19/2017	14:19:28
2	32.71	11.72	24.904	9.03	6/19/2017	14:19:30
2	32.73	11.72	24.917	8.5	6/19/2017	14:19:32
2	32.74	11.722	24.922	7.91	6/19/2017	14:19:34
2	32.72	11.724	24.904	7.36	6/19/2017	14:19:36
2	32.7	11.727	24.886	7.07	6/19/2017	14:19:38
2	32.71	11.736	24.889	6.32	6/19/2017	14:19:40
2	32.71	11.743	24.885	5.72	6/19/2017	14:19:42
2	32.72	11.743	24.89	5.21	6/19/2017	14:19:44
2	32.71	11.742	24.882	4.97	6/19/2017	14:19:46
2	32.72	11.739	24.887	4.19	6/19/2017	14:19:48
2	32.72	11.74	24.884	3.75	6/19/2017	14:19:50
2	32.71	11.741	24.874	3.3	6/19/2017	14:19:52
2	32.71	11.74	24.873	2.9	6/19/2017	14:19:54
2	32.71	11.739	24.869	1.94	6/19/2017	14:19:56
2	32.71	11.74	24.867	1.65	6/19/2017	14:19:58
2	32.7	11.741	24.858	1.48	6/19/2017	14:20:00
2	32.71	11.738	24.865	1.13	6/19/2017	14:20:06
2	32.72	11.739	24.873	1.21	6/19/2017	14:20:12
2	32.69	11.74	24.85	1.26	6/19/2017	14:20:18
2	32.69	11.738	24.85	1.11	6/19/2017	14:20:24
2	32.7	11.738	24.857	1.1	6/19/2017	14:20:26
2	32.69	11.738	24.85	1.3	6/19/2017	14:20:30
2	32.7	11.737	24.859	1.38	6/19/2017	14:20:32
2	32.7	11.735	24.86	1.64	6/19/2017	14:20:38
2	32.7	11.735	24.86	1.51	6/19/2017	14:20:40
2	32.7	11.734	24.863	2.23	6/19/2017	14:20:42
2	32.7	11.732	24.869	3.48	6/19/2017	14:20:44
2	32.7	11.731	24.869	3.5	6/19/2017	14:20:46
2	32.72	11.729	24.889	4.31	6/19/2017	14:20:48
2	32.7	11.728	24.877	5.14	6/19/2017	14:20:50
2	32.71	11.727	24.887	5.54	6/19/2017	14:20:52
2	32.72	11.727	24.897	5.92	6/19/2017	14:20:54
2	32.72	11.725	24.9	6.69	6/19/2017	14:20:56
2	32.71	11.725	24.896	7.37	6/19/2017	14:20:58
2	32.72	11.723	24.905	7.54	6/19/2017	14:21:00
2	32.72	11.725	24.908	8.34	6/19/2017	14:21:02
2	32.72	11.723	24.911	9	6/19/2017	14:21:04
2	32.72	11.719	24.914	9.42	6/19/2017	14:21:06
2	32.75	11.717	24.939	9.83	6/19/2017	14:21:08
2	32.72	11.715	24.921	10.75	6/19/2017	14:21:10
2	32.72	11.716	24.922	11.04	6/19/2017	14:21:12
2	32.74	11.717	24.939	11.51	6/19/2017	14:21:14
2	32.72	11.721	24.926	12.3	6/19/2017	14:21:16
2	32.73	11.72	24.935	12.46	6/19/2017	14:21:18
2	32.74	11.722	24.945	12.99	6/19/2017	14:21:20
2	32.73	11.721	24.943	14.22	6/19/2017	14:21:22
2	32.72	11.722	24.933	13.9	6/19/2017	14:21:24
2	32.74	11.722	24.95	14.21	6/19/2017	14:21:26
2	32.74	11.719	24.958	15.88	6/19/2017	14:21:28
2	32.74	11.72	24.957	15.52	6/19/2017	14:21:30
2	32.74	11.718	24.958	15.67	6/19/2017	14:21:32
2	32.73	11.718	24.957	17.14	6/19/2017	14:21:34
2	32.75	11.717	24.974	17.5	6/19/2017	14:21:36
2	32.76	11.717	24.98	17.03	6/19/2017	14:21:38
2	32.73	11.716	24.962	18.24	6/19/2017	14:21:40
2	32.75	11.717	24.98	18.8	6/19/2017	14:21:42
2	32.75	11.717	24.98	18.81	6/19/2017	14:21:44
2	32.73	11.716	24.968	19.65	6/19/2017	14:21:46
2	32.75	11.716	24.985	19.95	6/19/2017	14:21:48
2	32.74	11.717	24.978	20.22	6/19/2017	14:21:50
2	32.74	11.716	24.982	20.94	6/19/2017	14:21:52
2	32.74	11.715	24.985	21.6	6/19/2017	14:21:54
2	32.75	11.716	24.992	21.54	6/19/2017	14:21:56
2	32.75	11.716	24.994	21.97	6/19/2017	14:21:58
2	32.75	11.714	24.999	23.01	6/19/2017	14:22:00
2	32.75	11.713	24.999	23.01	6/19/2017	14:22:02
2	32.75	11.714	25.001	23.49	6/19/2017	14:22:04
2	32.73	11.714	24.989	24.1	6/19/2017	14:22:06
2	32.75	11.713	25.006	24.51	6/19/2017	14:22:08
2	32.75	11.713	25.007	24.74	6/19/2017	14:22:10
2	32.75	11.706	25.012	25.47	6/19/2017	14:22:12
2	32.76	11.71	25.021	25.96	6/19/2017	14:22:14
2	32.75	11.71	25.014	26.09	6/19/2017	14:22:16
2	32.75	11.708	25.018	26.85	6/19/2017	14:22:18
2	32.75	11.706	25.021	27.5	6/19/2017	14:22:20
2	32.75	11.705	25.021	27.51	6/19/2017	14:22:22
2	32.75	11.706	25.022	27.68	6/19/2017	14:22:24
2	32.76	11.702	25.036	29	6/19/2017	14:22:26
2	32.76	11.701	25.036	28.9	6/19/2017	14:22:28
2	32.76	11.7	25.036	28.92	6/19/2017	14:22:30
2	32.75	11.7	25.033	29.99	6/19/2017	14:22:32
2	32.73	11.7	25.018	30.14	6/19/2017	14:22:34
2	32.76	11.7	25.042	30.19	6/19/2017	14:22:36
2	32.76	11.699	25.045	30.9	6/19/2017	14:22:38
2	32.76	11.7	25.047	31.36	6/19/2017	14:22:40
2	32.75	11.701	25.038	31.07	6/19/2017	14:22:42
2	32.76	11.699	25.05	32.03	6/19/2017	14:22:44
2	32.75	11.697	25.044	32.3	6/19/2017	14:22:46
2	32.76	11.697	25.051	32.18	6/19/2017	14:22:48
2	32.76	11.697	25.056	33.21	6/19/2017	14:22:50
2	32.76	11.697	25.056	33.19	6/19/2017	14:22:52
2	32.76	11.697	25.057	33.5	6/19/2017	14:22:54
2	32.77	11.697	25.068	34.18	6/19/2017	14:22:56
2	32.75	11.696	25.055	34.59	6/19/2017	14:22:58
2	32.76	11.697	25.062	34.46	6/19/2017	14:23:00
2	32.77	11.695	25.075	35.55	6/19/2017	14:23:02
2	32.77	11.694	25.075	35.65	6/19/2017	14:23:04
2	32.76	11.693	25.067	35.52	6/19/2017	14:23:06
2	32.77	11.694	25.08	36.65	6/19/2017	14:23:08
2	32.75	11.693	25.066	37	6/19/2017	14:23:10
2	32.78	11.692	25.088	36.63	6/19/2017	14:23:12
2	32.77	11.691	25.085	37.73	6/19/2017	14:23:14
2	32.77	11.688	25.088	38.19	6/19/2017	14:23:16
2	32.77	11.688	25.088	38.21	6/19/2017	14:23:18
2	32.77	11.687	25.088	38.25	6/19/2017	14:23:20
2	32.77	11.673	25.096	39.33	6/19/2017	14:23:22
2	32.76	11.668	25.09	39.59	6/19/2017	14:23:24
2	32.78	11.668	25.105	39.39	6/19/2017	14:23:26
2	32.77	11.668	25.101	40.26	6/19/2017	14:23:28
2	32.77	11.669	25.102	40.47	6/19/2017	14:23:30
2	32.76	11.668	25.095	40.55	6/19/2017	14:23:32
2	32.75	11.669	25.09	41.25	6/19/2017	14:23:34
2	32.78	11.67	25.115	41.79	6/19/2017	14:23:36
2	32.79	11.668	25.123	41.59	6/19/2017	14:23:38
2	32.81	11.668	25.139	41.89	6/19/2017	14:23:40
2	32.79	11.666	25.129	42.89	6/19/2017	14:23:42
2	32.81	11.665	25.142	42.28	6/19/2017	14:23:44
2	32.81	11.664	25.145	42.89	6/19/2017	14:23:46
2	32.82	11.662	25.157	43.82	6/19/2017	14:23:48
2	32.82	11.661	25.155	43.39	6/19/2017	14:23:50
2	32.82	11.661	25.156	43.6	6/19/2017	14:23:52
2	32.82	11.662	25.161	44.68	6/19/2017	14:23:54
2	32.82	11.661	25.16	44.55	6/19/2017	14:23:56
2	32.84	11.661	25.176	44.59	6/19/2017	14:23:58
2	32.82	11.66	25.164	45.21	6/19/2017	14:24:00
2	32.84	11.659	25.182	45.78	6/19/2017	14:24:02
2	32.86	11.659	25.199	46.16	6/19/2017	14:24:04
2	32.85	11.659	25.192	46.38	6/19/2017	14:24:06
2	32.87	11.659	25.209	46.69	6/19/2017	14:24:08
2	32.85	11.647	25.199	47.36	6/19/2017	14:24:10
2	32.87	11.627	25.22	47.85	6/19/2017	14:24:12
2	32.96	11.561	25.305	48.49	6/19/2017	14:24:14
2	32.95	11.58	25.293	48.24	6/19/2017	14:24:16
2	32.95	11.569	25.297	48.7	6/19/2017	14:24:18
2	33.04	11.5	25.384	49.73	6/19/2017	14:24:20
2	33.04	11.496	25.385	49.83	6/19/2017	14:24:22
2	33.03	11.509	25.377	50.22	6/19/2017	14:24:24
2	33.04	11.478	25.392	50.64	6/19/2017	14:24:26
2	33.02	11.514	25.371	50.73	6/19/2017	14:24:28
2	33.05	11.473	25.405	51.51	6/19/2017	14:24:30
2	33.12	11.405	25.474	52.1	6/19/2017	14:24:32
2	33.1	11.435	25.453	51.96	6/19/2017	14:24:34
2	33.08	11.457	25.435	52.4	6/19/2017	14:24:36
2	33.18	11.322	25.541	53.08	6/19/2017	14:24:38
2	33.14	11.354	25.505	53.28	6/19/2017	14:24:40
2	33.32	11.157	25.682	53.77	6/19/2017	14:24:42
2	33.24	11.216	25.61	53.9	6/19/2017	14:24:44
2	33.37	11.044	25.746	54.64	6/19/2017	14:24:46
2	33.35	10.994	25.74	54.87	6/19/2017	14:24:48
2	33.34	11.044	25.724	55.07	6/19/2017	14:24:50
2	33.44	10.857	25.839	55.89	6/19/2017	14:24:52
2	33.47	10.792	25.875	56.03	6/19/2017	14:24:54
2	33.46	10.818	25.864	56.41	6/19/2017	14:24:56
2	33.52	10.739	25.926	56.78	6/19/2017	14:24:58
2	33.53	10.705	25.943	57.32	6/19/2017	14:25:00
2	33.56	10.649	25.977	57.63	6/19/2017	14:25:02
2	33.53	10.624	25.961	58.25	6/19/2017	14:25:04
2	33.58	10.594	26.006	58.52	6/19/2017	14:25:06
2	33.53	10.618	25.963	58.56	6/19/2017	14:25:08
2	33.58	10.571	26.014	59.34	6/19/2017	14:25:10
2	33.64	10.46	26.084	60.05	6/19/2017	14:25:12
2	33.56	10.504	26.012	59.81	6/19/2017	14:25:14
2	33.61	10.493	26.056	60.42	6/19/2017	14:25:16
2	33.75	10.28	26.206	61.28	6/19/2017	14:25:18
2	33.58	10.448	26.043	61.01	6/19/2017	14:25:20
2	33.69	10.364	26.147	61.72	6/19/2017	14:25:22
2	33.82	10.108	26.295	62.37	6/19/2017	14:25:24
2	33.63	10.294	26.114	62.23	6/19/2017	14:25:26
2	33.63	10.378	26.099	61.94	6/19/2017	14:25:28
2	33.66	10.367	26.127	62.58	6/19/2017	14:25:30
2	33.61	10.369	26.087	62.43	6/19/2017	14:25:32
2	33.79	10.137	26.264	61.78	6/19/2017	14:25:34
2	33.7	10.234	26.179	62.25	6/19/2017	14:25:36
2	33.76	10.222	26.23	62.72	6/19/2017	14:25:38
2	33.73	10.21	26.206	61.98	6/19/2017	14:25:40
2	33.73	10.168	26.214	62.18	6/19/2017	14:25:42
2	33.78	10.165	26.254	62.28	6/19/2017	14:25:44
2	33.79	10.123	26.267	61.97	6/19/2017	14:25:46
2	33.79	10.07	26.274	61.48	6/19/2017	14:25:48
2	33.8	10.055	26.281	60.73	6/19/2017	14:25:50
2	33.75	10.093	26.235	60.62	6/19/2017	14:25:52
2	33.64	10.304	26.109	59.66	6/19/2017	14:25:54
2	33.63	10.369	26.088	59.29	6/19/2017	14:25:56
2	33.62	10.404	26.074	59.14	6/19/2017	14:25:58
2	33.52	10.552	25.965	58.14	6/19/2017	14:26:00
2	33.53	10.579	25.967	57.75	6/19/2017	14:26:02
2	33.57	10.562	26	57.55	6/19/2017	14:26:04
2	33.51	10.62	25.94	56.85	6/19/2017	14:26:06
2	33.48	10.701	25.898	55.92	6/19/2017	14:26:08
2	33.53	10.639	25.949	56.17	6/19/2017	14:26:10
2	33.43	10.709	25.855	55.4	6/19/2017	14:26:12
2	33.42	10.841	25.819	54.36	6/19/2017	14:26:14
2	33.48	10.797	25.874	54.38	6/19/2017	14:26:16
2	33.54	10.707	25.936	54.14	6/19/2017	14:26:18
2	33.22	11.122	25.607	52.85	6/19/2017	14:26:20
2	33.3	11.125	25.668	52.69	6/19/2017	14:26:22
2	33.46	10.841	25.842	52.41	6/19/2017	14:26:24
2	33.27	11.16	25.634	51.73	6/19/2017	14:26:26
2	33.13	11.342	25.49	51.18	6/19/2017	14:26:28
2	33.1	11.414	25.451	50.62	6/19/2017	14:26:30
2	33.09	11.429	25.439	50.3	6/19/2017	14:26:32
2	33.06	11.471	25.404	49.47	6/19/2017	14:26:34
2	33.08	11.431	25.428	49.67	6/19/2017	14:26:36
2	33.04	11.483	25.383	48.71	6/19/2017	14:26:38
2	32.94	11.594	25.279	47.45	6/19/2017	14:26:40
2	33.04	11.479	25.381	48.08	6/19/2017	14:26:42
2	32.96	11.556	25.301	47.24	6/19/2017	14:26:44
2	32.87	11.632	25.213	46.5	6/19/2017	14:26:46
2	32.94	11.594	25.273	46.05	6/19/2017	14:26:48
2	32.86	11.653	25.197	45.38	6/19/2017	14:26:50
2	32.85	11.656	25.187	45.13	6/19/2017	14:26:52
2	32.86	11.657	25.193	44.81	6/19/2017	14:26:54
2	32.84	11.659	25.174	43.94	6/19/2017	14:26:56
2	32.83	11.659	25.163	43.35	6/19/2017	14:26:58
2	32.84	11.658	25.169	42.96	6/19/2017	14:27:00
2	32.82	11.661	25.151	42.5	6/19/2017	14:27:02
2	32.82	11.663	25.148	41.92	6/19/2017	14:27:04
2	32.81	11.663	25.139	41.53	6/19/2017	14:27:06
2	32.81	11.666	25.135	40.79	6/19/2017	14:27:08
2	32.81	11.665	25.132	40.09	6/19/2017	14:27:10
2	32.8	11.665	25.124	40.11	6/19/2017	14:27:12
2	32.81	11.665	25.129	39.36	6/19/2017	14:27:14
2	32.8	11.67	25.116	38.56	6/19/2017	14:27:16
2	32.8	11.668	25.116	38.44	6/19/2017	14:27:18
2	32.77	11.672	25.087	37.43	6/19/2017	14:27:20
2	32.75	11.693	25.067	37.16	6/19/2017	14:27:22
2	32.75	11.689	25.066	36.88	6/19/2017	14:27:24
2	32.77	11.693	25.078	36.17	6/19/2017	14:27:26
2	32.76	11.7	25.064	35.13	6/19/2017	14:27:28
2	32.76	11.698	25.064	35.08	6/19/2017	14:27:30
2	32.76	11.699	25.063	34.73	6/19/2017	14:27:32
2	32.75	11.694	25.052	33.86	6/19/2017	14:27:34
2	32.76	11.686	25.058	33.26	6/19/2017	14:27:36
2	32.75	11.683	25.051	33.13	6/19/2017	14:27:38
2	32.76	11.685	25.054	32.23	6/19/2017	14:27:40
2	32.75	11.692	25.042	31.7	6/19/2017	14:27:42
2	32.74	11.69	25.036	31.84	6/19/2017	14:27:44
2	32.74	11.694	25.029	30.6	6/19/2017	14:27:46
2	32.77	11.698	25.048	29.66	6/19/2017	14:27:48
2	32.74	11.692	25.029	30.37	6/19/2017	14:27:50
2	32.76	11.693	25.039	29.25	6/19/2017	14:27:52
2	32.74	11.692	25.019	28.19	6/19/2017	14:27:54
2	32.76	11.692	25.034	28.13	6/19/2017	14:27:56
2	32.76	11.692	25.033	27.81	6/19/2017	14:27:58
2	32.75	11.693	25.02	26.69	6/19/2017	14:28:00
2	32.76	11.693	25.026	26.31	6/19/2017	14:28:02
2	32.76	11.692	25.026	26.24	6/19/2017	14:28:04
2	32.75	11.694	25.014	25.51	6/19/2017	14:28:06
2	32.74	11.694	25.001	24.26	6/19/2017	14:28:08
2	32.74	11.695	25.002	24.5	6/19/2017	14:28:10
2	32.73	11.694	24.992	24.1	6/19/2017	14:28:12
2	32.75	11.698	25.001	22.75	6/19/2017	14:28:14
2	32.74	11.698	24.993	22.75	6/19/2017	14:28:16
2	32.76	11.696	25.008	22.42	6/19/2017	14:28:18
2	32.75	11.7	24.994	21.25	6/19/2017	14:28:20
2	32.77	11.699	25.009	21.11	6/19/2017	14:28:22
2	32.74	11.7	24.984	20.68	6/19/2017	14:28:24
2	32.75	11.7	24.988	19.85	6/19/2017	14:28:26
2	32.74	11.701	24.979	19.65	6/19/2017	14:28:28
2	32.75	11.702	24.983	18.88	6/19/2017	14:28:30
2	32.74	11.709	24.971	18.26	6/19/2017	14:28:32
2	32.74	11.708	24.97	17.93	6/19/2017	14:28:34
2	32.75	11.707	24.976	17.61	6/19/2017	14:28:36
2	32.74	11.711	24.964	16.83	6/19/2017	14:28:38
2	32.75	11.71	24.968	15.94	6/19/2017	14:28:40
2	32.73	11.71	24.952	15.9	6/19/2017	14:28:42
2	32.73	11.709	24.95	15.38	6/19/2017	14:28:44
2	32.73	11.711	24.945	14.35	6/19/2017	14:28:46
2	32.73	11.711	24.945	14.29	6/19/2017	14:28:48
2	32.73	11.712	24.94	13.31	6/19/2017	14:28:50
2	32.71	11.712	24.924	13.19	6/19/2017	14:28:52
2	32.72	11.711	24.928	12.22	6/19/2017	14:28:54
2	32.73	11.715	24.933	11.83	6/19/2017	14:28:56
2	32.75	11.712	24.948	11.62	6/19/2017	14:28:58
2	32.72	11.715	24.92	10.57	6/19/2017	14:29:00
2	32.72	11.714	24.919	10.38	6/19/2017	14:29:02
2	32.74	11.715	24.931	9.67	6/19/2017	14:29:04
2	32.73	11.716	24.921	9.08	6/19/2017	14:29:06
2	32.74	11.718	24.927	8.84	6/19/2017	14:29:08
2	32.71	11.718	24.9	8.07	6/19/2017	14:29:10
2	32.73	11.72	24.912	7.36	6/19/2017	14:29:12
2	32.72	11.719	24.904	7.3	6/19/2017	14:29:14
2	32.74	11.72	24.915	6.34	6/19/2017	14:29:16
2	32.71	11.721	24.89	5.87	6/19/2017	14:29:18
2	32.72	11.72	24.896	5.42	6/19/2017	14:29:20
2	32.73	11.721	24.901	4.98	6/19/2017	14:29:22
2	32.71	11.722	24.882	4.19	6/19/2017	14:29:24
2	32.71	11.722	24.88	3.79	6/19/2017	14:29:26
2	32.72	11.721	24.887	3.52	6/19/2017	14:29:28
2	32.7	11.728	24.865	2.47	6/19/2017	14:29:30
2	32.71	11.726	24.873	2.33	6/19/2017	14:29:32
2	32.68	11.728	24.847	1.83	6/19/2017	14:29:34
2	32.71	11.74	24.864	1.04	6/19/2017	14:29:36
2	32.71	11.731	24.867	1.21	6/19/2017	14:29:40
2	32.7	11.73	24.859	1.09	6/19/2017	14:29:46
2	32.69	11.727	24.851	1.05	6/19/2017	14:29:48
2	32.71	11.728	24.867	1.07	6/19/2017	14:29:52
2	32.7	11.73	24.858	1.03	6/19/2017	14:29:54
2	32.7	11.732	24.858	1	6/19/2017	14:30:04
2	32.7	11.731	24.858	1.08	6/19/2017	14:30:10
2	32.7	11.733	24.858	1	6/19/2017	14:30:14
2	32.71	11.731	24.867	1.22	6/19/2017	14:30:22
2	32.7	11.73	24.862	1.73	6/19/2017	14:30:28
2	32.71	11.731	24.87	1.95	6/19/2017	14:30:30
2	32.71	11.731	24.87	1.84	6/19/2017	14:30:32
2	32.71	11.731	24.873	2.56	6/19/2017	14:30:34
2	32.72	11.731	24.883	3.13	6/19/2017	14:30:36
2	32.72	11.732	24.883	3.02	6/19/2017	14:30:38
2	32.7	11.731	24.87	3.75	6/19/2017	14:30:40
2	32.73	11.727	24.897	4.39	6/19/2017	14:30:42
2	32.7	11.729	24.873	4.25	6/19/2017	14:30:44
2	32.72	11.727	24.893	5.08	6/19/2017	14:30:46
2	32.7	11.727	24.879	5.53	6/19/2017	14:30:48
2	32.71	11.726	24.889	5.83	6/19/2017	14:30:50
2	32.7	11.727	24.882	6.2	6/19/2017	14:30:52
2	32.72	11.726	24.901	6.87	6/19/2017	14:30:54
2	32.73	11.725	24.911	7.24	6/19/2017	14:30:56
2	32.73	11.725	24.912	7.61	6/19/2017	14:30:58
2	32.72	11.723	24.908	8.23	6/19/2017	14:31:00
2	32.74	11.722	24.924	8.36	6/19/2017	14:31:02
2	32.73	11.723	24.919	8.92	6/19/2017	14:31:04
2	32.74	11.722	24.93	9.66	6/19/2017	14:31:06
2	32.73	11.721	24.922	9.68	6/19/2017	14:31:08
2	32.72	11.723	24.916	9.98	6/19/2017	14:31:10
2	32.72	11.721	24.919	10.75	6/19/2017	14:31:12
2	32.73	11.72	24.929	11.1	6/19/2017	14:31:14
2	32.74	11.721	24.936	11.08	6/19/2017	14:31:16
2	32.73	11.72	24.932	11.86	6/19/2017	14:31:18
2	32.75	11.718	24.951	12.45	6/19/2017	14:31:20
2	32.74	11.72	24.942	12.28	6/19/2017	14:31:22
2	32.75	11.719	24.953	12.98	6/19/2017	14:31:24
2	32.73	11.719	24.941	13.64	6/19/2017	14:31:26
2	32.75	11.719	24.956	13.52	6/19/2017	14:31:28
2	32.74	11.719	24.951	14.21	6/19/2017	14:31:30
2	32.75	11.719	24.962	14.97	6/19/2017	14:31:32
2	32.76	11.719	24.969	14.82	6/19/2017	14:31:34
2	32.76	11.719	24.972	15.34	6/19/2017	14:31:36
2	32.73	11.718	24.951	15.94	6/19/2017	14:31:38
2	32.74	11.718	24.959	16.07	6/19/2017	14:31:40
2	32.73	11.718	24.956	17.02	6/19/2017	14:31:42
2	32.75	11.718	24.971	16.86	6/19/2017	14:31:44
2	32.75	11.718	24.973	17.36	6/19/2017	14:31:46
2	32.76	11.717	24.984	17.96	6/19/2017	14:31:48
2	32.76	11.713	24.987	18.43	6/19/2017	14:31:50
2	32.76	11.713	24.987	18.58	6/19/2017	14:31:52
2	32.75	11.714	24.981	18.88	6/19/2017	14:31:54
2	32.76	11.712	24.992	19.62	6/19/2017	14:31:56
2	32.74	11.713	24.978	19.88	6/19/2017	14:31:58
2	32.75	11.713	24.987	20.17	6/19/2017	14:32:00
2	32.74	11.713	24.98	20.51	6/19/2017	14:32:02
2	32.75	11.71	24.992	21.28	6/19/2017	14:32:04
2	32.75	11.708	24.993	21.32	6/19/2017	14:32:06
2	32.74	11.712	24.986	21.63	6/19/2017	14:32:08
2	32.74	11.706	24.99	22.33	6/19/2017	14:32:10
2	32.74	11.705	24.992	22.69	6/19/2017	14:32:12
2	32.76	11.706	25.008	22.96	6/19/2017	14:32:14
2	32.75	11.707	25.001	23.13	6/19/2017	14:32:16
2	32.75	11.705	25.007	24.3	6/19/2017	14:32:18
2	32.74	11.704	24.998	24.06	6/19/2017	14:32:20
2	32.77	11.704	25.023	24.34	6/19/2017	14:32:22
2	32.76	11.703	25.019	25.2	6/19/2017	14:32:24
2	32.76	11.702	25.02	25.51	6/19/2017	14:32:26
2	32.76	11.703	25.021	25.7	6/19/2017	14:32:28
2	32.76	11.704	25.024	26.26	6/19/2017	14:32:30
2	32.76	11.702	25.027	26.87	6/19/2017	14:32:32
2	32.75	11.699	25.019	26.86	6/19/2017	14:32:34
2	32.75	11.695	25.022	27.25	6/19/2017	14:32:36
2	32.75	11.691	25.028	28.44	6/19/2017	14:32:38
2	32.76	11.69	25.035	28.22	6/19/2017	14:32:40
2	32.75	11.689	25.028	28.3	6/19/2017	14:32:42
2	32.77	11.691	25.05	29.9	6/19/2017	14:32:44
2	32.77	11.692	25.047	29.31	6/19/2017	14:32:46
2	32.76	11.691	25.042	29.89	6/19/2017	14:32:48
2	32.75	11.691	25.038	30.77	6/19/2017	14:32:50
2	32.76	11.691	25.047	30.95	6/19/2017	14:32:52
2	32.76	11.692	25.049	31.32	6/19/2017	14:32:54
2	32.77	11.693	25.057	31.56	6/19/2017	14:32:56
2	32.75	11.697	25.045	32.51	6/19/2017	14:32:58
2	32.77	11.696	25.06	32.32	6/19/2017	14:33:00
2	32.76	11.697	25.056	33.18	6/19/2017	14:33:02
2	32.77	11.695	25.066	33.5	6/19/2017	14:33:04
2	32.75	11.696	25.05	33.6	6/19/2017	14:33:06
2	32.76	11.679	25.064	34.3	6/19/2017	14:33:08
2	32.77	11.678	25.075	34.91	6/19/2017	14:33:10
2	32.77	11.675	25.076	35.03	6/19/2017	14:33:12
2	32.76	11.675	25.07	35.31	6/19/2017	14:33:14
2	32.76	11.676	25.073	36.07	6/19/2017	14:33:16
2	32.76	11.674	25.074	36.34	6/19/2017	14:33:18
2	32.78	11.669	25.093	36.85	6/19/2017	14:33:20
2	32.76	11.668	25.078	36.79	6/19/2017	14:33:22
2	32.76	11.667	25.081	37.54	6/19/2017	14:33:24
2	32.77	11.669	25.092	38.31	6/19/2017	14:33:26
2	32.76	11.667	25.081	37.59	6/19/2017	14:33:28
2	32.77	11.669	25.093	38.49	6/19/2017	14:33:30
2	32.77	11.67	25.096	39.31	6/19/2017	14:33:32
2	32.77	11.67	25.097	39.39	6/19/2017	14:33:34
2	32.78	11.672	25.104	39.29	6/19/2017	14:33:36
2	32.79	11.671	25.114	39.82	6/19/2017	14:33:38
2	32.77	11.669	25.103	40.83	6/19/2017	14:33:40
2	32.79	11.669	25.118	40.56	6/19/2017	14:33:42
2	32.81	11.667	25.135	40.83	6/19/2017	14:33:44
2	32.81	11.664	25.138	41.48	6/19/2017	14:33:46
2	32.82	11.664	25.148	41.95	6/19/2017	14:33:48
2	32.82	11.663	25.148	41.84	6/19/2017	14:33:50
2	32.81	11.662	25.143	42.53	6/19/2017	14:33:52
2	32.84	11.661	25.168	42.69	6/19/2017	14:33:54
2	32.83	11.661	25.162	43.21	6/19/2017	14:33:56
2	32.82	11.66	25.157	43.79	6/19/2017	14:33:58
2	32.84	11.659	25.171	43.45	6/19/2017	14:34:00
2	32.84	11.659	25.175	44.25	6/19/2017	14:34:02
2	32.85	11.659	25.187	45.26	6/19/2017	14:34:04
2	32.84	11.659	25.177	44.68	6/19/2017	14:34:06
2	32.84	11.659	25.181	45.55	6/19/2017	14:34:08
2	32.84	11.659	25.184	46.36	6/19/2017	14:34:10
2	32.85	11.659	25.192	46.23	6/19/2017	14:34:12
2	32.86	11.659	25.201	46.69	6/19/2017	14:34:14
2	32.87	11.647	25.215	47.41	6/19/2017	14:34:16
2	32.87	11.645	25.216	47.63	6/19/2017	14:34:18
2	32.89	11.623	25.238	48.16	6/19/2017	14:34:20
2	32.93	11.594	25.276	48.43	6/19/2017	14:34:22
2	32.97	11.542	25.318	48.92	6/19/2017	14:34:24
2	33.01	11.518	25.355	49.19	6/19/2017	14:34:26
2	33.03	11.501	25.377	49.92	6/19/2017	14:34:28
2	33.03	11.492	25.38	50.15	6/19/2017	14:34:30
2	33.03	11.497	25.379	50.1	6/19/2017	14:34:32
2	33.03	11.495	25.383	51.03	6/19/2017	14:34:34
2	33.05	11.473	25.405	51.49	6/19/2017	14:34:36
2	33.04	11.482	25.396	51.52	6/19/2017	14:34:38
2	33.04	11.481	25.398	52	6/19/2017	14:34:40
2	33.11	11.432	25.463	52.38	6/19/2017	14:34:42
2	33.13	11.399	25.487	52.92	6/19/2017	14:34:44
2	33.17	11.356	25.527	53.16	6/19/2017	14:34:46
2	33.14	11.399	25.496	53.24	6/19/2017	14:34:48
2	33.2	11.302	25.564	54.08	6/19/2017	14:34:50
2	33.25	11.181	25.627	54.43	6/19/2017	14:34:52
2	33.2	11.302	25.566	54.57	6/19/2017	14:34:54
2	33.35	11.132	25.716	55.1	6/19/2017	14:34:56
2	33.45	10.901	25.837	55.36	6/19/2017	14:34:58
2	33.51	10.82	25.901	56.14	6/19/2017	14:35:00
2	33.49	10.78	25.895	56.57	6/19/2017	14:35:02
2	33.48	10.797	25.885	56.77	6/19/2017	14:35:04
2	33.52	10.733	25.93	57.36	6/19/2017	14:35:06
2	33.46	10.798	25.871	57.27	6/19/2017	14:35:08
2	33.54	10.656	25.964	58.45	6/19/2017	14:35:10
2	33.51	10.625	25.946	58.45	6/19/2017	14:35:12
2	33.53	10.629	25.962	58.66	6/19/2017	14:35:14
2	33.61	10.533	26.046	59.72	6/19/2017	14:35:16
2	33.62	10.407	26.077	59.96	6/19/2017	14:35:18
2	33.55	10.553	25.996	59.74	6/19/2017	14:35:20
2	33.62	10.496	26.063	60.39	6/19/2017	14:35:22
2	33.75	10.272	26.208	61.33	6/19/2017	14:35:24
2	33.89	10.077	26.352	61.79	6/19/2017	14:35:26
2	33.71	10.205	26.188	61.41	6/19/2017	14:35:28
2	33.78	10.164	26.253	62.16	6/19/2017	14:35:30
2	33.79	10.086	26.278	62.89	6/19/2017	14:35:32
2	33.75	10.121	26.241	62.88	6/19/2017	14:35:34
2	33.78	10.13	26.264	63.13	6/19/2017	14:35:36
2	33.82	10.068	26.307	63.56	6/19/2017	14:35:38
2	33.7	10.263	26.178	62.95	6/19/2017	14:35:40
2	33.72	10.256	26.196	63.29	6/19/2017	14:35:42
2	33.78	10.152	26.26	63.24	6/19/2017	14:35:44
2	33.82	10.045	26.308	62.78	6/19/2017	14:35:46
2	33.77	10.098	26.263	63.5	6/19/2017	14:35:48
2	33.84	10.036	26.327	63.18	6/19/2017	14:35:50
2	33.75	10.063	26.248	62.23	6/19/2017	14:35:52
2	33.83	9.986	26.322	61.94	6/19/2017	14:35:54
2	33.82	9.997	26.31	61.5	6/19/2017	14:35:56
2	33.8	10.039	26.284	60.79	6/19/2017	14:35:58
2	33.78	10.088	26.258	60.4	6/19/2017	14:36:00
2	33.73	10.134	26.21	60.15	6/19/2017	14:36:02
2	33.67	10.317	26.127	59.12	6/19/2017	14:36:04
2	33.6	10.422	26.053	58.71	6/19/2017	14:36:06
2	33.59	10.479	26.034	58.35	6/19/2017	14:36:08
2	33.56	10.526	26	57.99	6/19/2017	14:36:10
2	33.48	10.626	25.917	57.27	6/19/2017	14:36:12
2	33.49	10.697	25.909	56.58	6/19/2017	14:36:14
2	33.5	10.707	25.915	56.38	6/19/2017	14:36:16
2	33.46	10.758	25.871	55.67	6/19/2017	14:36:18
2	33.46	10.832	25.855	54.89	6/19/2017	14:36:20
2	33.46	10.82	25.857	55.03	6/19/2017	14:36:22
2	33.42	10.832	25.822	54.48	6/19/2017	14:36:24
2	33.2	11.184	25.582	53.29	6/19/2017	14:36:26
2	33.22	11.258	25.583	52.97	6/19/2017	14:36:28
2	33.41	10.982	25.781	53.17	6/19/2017	14:36:30
2	33.13	11.37	25.488	51.9	6/19/2017	14:36:32
2	33.19	11.315	25.543	51.62	6/19/2017	14:36:34
2	33.14	11.329	25.5	51.23	6/19/2017	14:36:36
2	33.11	11.442	25.454	50.69	6/19/2017	14:36:38
2	33.05	11.474	25.398	49.9	6/19/2017	14:36:40
2	33.04	11.469	25.391	49.91	6/19/2017	14:36:42
2	33.04	11.488	25.384	49.13	6/19/2017	14:36:44
2	33.02	11.499	25.363	48.44	6/19/2017	14:36:46
2	33.04	11.49	25.38	48.32	6/19/2017	14:36:48
2	32.97	11.555	25.308	47.16	6/19/2017	14:36:50
2	32.97	11.529	25.314	47.29	6/19/2017	14:36:52
2	32.96	11.57	25.296	46.73	6/19/2017	14:36:54
2	32.88	11.646	25.217	46.06	6/19/2017	14:36:56
2	32.87	11.658	25.203	45.17	6/19/2017	14:36:58
2	32.85	11.656	25.186	44.91	6/19/2017	14:37:00
2	32.87	11.654	25.201	44.75	6/19/2017	14:37:02
2	32.87	11.658	25.198	44.12	6/19/2017	14:37:04
2	32.85	11.66	25.177	43.12	6/19/2017	14:37:06
2	32.84	11.657	25.169	42.76	6/19/2017	14:37:08
2	32.85	11.657	25.176	42.66	6/19/2017	14:37:10
2	32.84	11.66	25.163	41.59	6/19/2017	14:37:12
2	32.83	11.66	25.154	41.46	6/19/2017	14:37:14
2	32.82	11.665	25.143	40.86	6/19/2017	14:37:16
2	32.81	11.669	25.131	40.12	6/19/2017	14:37:18
2	32.79	11.67	25.113	39.66	6/19/2017	14:37:20
2	32.8	11.669	25.12	39.29	6/19/2017	14:37:22
2	32.78	11.668	25.102	38.69	6/19/2017	14:37:24
2	32.76	11.668	25.083	38.05	6/19/2017	14:37:26
2	32.77	11.668	25.089	37.63	6/19/2017	14:37:28
2	32.76	11.667	25.079	37.17	6/19/2017	14:37:30
2	32.76	11.664	25.076	36.32	6/19/2017	14:37:32
2	32.76	11.664	25.076	36.25	6/19/2017	14:37:34
2	32.76	11.667	25.07	35.17	6/19/2017	14:37:36
2	32.76	11.67	25.068	34.67	6/19/2017	14:37:38
2	32.76	11.667	25.069	34.81	6/19/2017	14:37:40
2	32.75	11.675	25.055	33.72	6/19/2017	14:37:42
2	32.76	11.677	25.058	32.87	6/19/2017	14:37:44
2	32.75	11.677	25.05	32.74	6/19/2017	14:37:46
2	32.75	11.678	25.047	32.24	6/19/2017	14:37:48
2	32.75	11.679	25.045	31.72	6/19/2017	14:37:50
2	32.75	11.678	25.044	31.36	6/19/2017	14:37:52
2	32.76	11.678	25.047	30.36	6/19/2017	14:37:54
2	32.76	11.677	25.044	29.65	6/19/2017	14:37:56
[truncated: 3,852 more rows]

## Sheet: FRRf
depth	Station	PAR	Fv/Fm(Fq'/Fm')	RSigma(')	Sigma(')	JPII	Chl2
1	1	261.167	0.425333	0.039425	4.285	674.55	0.65065
3	1	168.6	0.3852	0.03672	3.99	403.54	0.79528
4	2	153	0.462	0.0466	5.06333	455.167	0.716167
5	1	126.5	0.4175	0.0412	4.475	339.1	0.7695
5	2	142.667	0.394	0.0472	5.13	442.933	0.750267
6	1	103	0.409	0.0420667	4.57333	283.8	0.8091
6	2	148	0.415	0.04135	4.495	396.6	0.75875
8	1	83.5	0.4275	0.0447	4.855	243.45	0.73745
8	2	101	0.392	0.043125	4.6875	282.625	0.82745
9	1	72.4	0.4288	0.04154	4.516	196.9	0.79098
9	2	99.6667	0.418667	0.0452	4.91667	289.433	0.817667
10	1	59.6667	0.409833	0.0443333	4.82167	173.533	0.792317
10	2	70	0.458	0.042525	4.62	195.025	0.753025
11	1	55	0.4315	0.0447	4.865	160.7	0.75155
11	2	93	0.4565	0.04895	5.315	297.4	0.7317
12	1	50	0.461	0.0493667	5.36667	161.533	0.744233
12	2	38.5	0.441	0.04215	4.585	107.355	0.77535
13	2	40.6667	0.438	0.0491	5.33333	131.2	0.763267
14	1	36	0.442	0.048675	5.2925	114.125	0.766725
14	2	53	0.460333	0.0509	5.53333	176.9	0.7246
16	2	39.3333	0.447667	0.0460333	5	118.713	0.770967
17	1	28	0.47	0.04165	4.53	76.39	0.7305
17	2	23.5	0.4485	0.0438	4.76	66.65	0.7627
18	2	27.6667	0.463667	0.0482333	5.24333	88.79	0.727133
19	1	20.5	0.421	0.04515	4.91	60.71	0.79035
19	2	27	0.436	0.04885	5.31	84.68	0.79365
20	1	17.5	0.5275	0.04815	5.235	54.875	0.6824
20	2	32.5	0.4505	0.0471	5.125	100.22	0.75915
21	1	17	0.4515	0.04605	5.005	50.835	0.7287
21	2	15	0.444333	0.044	4.78333	42.68	0.775333
22	2	20	0.427	0.0410667	4.46333	54.57	0.818733
23	1	14	0.4615	0.04625	5.03	42.195	0.7666
24	2	13.6667	0.441333	0.0423667	4.60667	38.0667	0.7923
25	1	11	0.46225	0.04575	4.9775	32.68	0.73645
25	2	13	0.455333	0.0478333	5.20667	40.5933	0.748333
26	2	12.5	0.44	0.04545	4.94	37.575	0.79125
27	1	9	0.434667	0.0452667	4.92333	26.6967	0.7551
27	2	10.6667	0.445333	0.0470667	5.11667	33.4333	0.773633
29	1	7	0.505	0.0488	5.305	22.355	0.68095
29	2	7.66667	0.449333	0.0464667	5.05	23.2267	0.770633
30	1	6.5	0.445	0.04125	4.485	17.535	0.7692
30	2	8	0.4795	0.0495	5.38	25.3	0.7308
31	1	6	0.464	0.0473	5.14	18.3633	0.704667
31	2	8.66667	0.459	0.0463333	5.03667	26.7867	0.752567
32	1	6	0.4185	0.0364	3.955	14.29	0.8072
32	2	6.66667	0.478333	0.0501667	5.45333	22.31	0.724733
33	1	5	0.477	0.05165	5.615	17.07	0.6899
33	2	6	0.47675	0.0482	5.24	18.795	0.7242
34	1	4.5	0.466	0.0445	4.835	13.265	0.7181
35	2	5.66667	0.423333	0.0447667	4.86667	16.75	0.7938
36	1	3.5	0.459167	0.0444167	4.82667	10.1	0.718167
36	2	2.66667	0.469	0.0478667	5.2	8.32333	0.723133
37	2	4.66667	0.446	0.045	4.89	13.3167	0.7891
38	1	3	0.48	0.04515	4.91	8.87	0.6821
38	2	3.5	0.445	0.04225	4.59	9.865	0.74355
39	2	2	0.463	0.0472667	5.14	6.19	0.721067
40	2	3	0.4795	0.0488	5.3	9.795	0.69245
42	1	2	0.4615	0.0468	5.09	6.13	0.69195
42	2	2.2	0.4542	0.04576	4.976	6.482	0.75212
43	1	2	0.487333	0.0503333	5.47	6.59	0.678067
43	2	1.66667	0.458	0.0475	5.16	5.31	0.710667
44	1	2	0.4545	0.04285	4.655	5.605	0.729
44	2	2	0.446	0.0474	5.15	5.785	0.7269
45	2	1.75	0.46525	0.046825	5.0875	5.3025	0.70405
46	1	1	0.435	0.0484	5.26	3.17	0.7389
46	2	1	0.462	0.0455	4.945	2.975	0.64505
47	1	1	0.449	0.05155	5.61	3.375	0.7278
47	2	1	0.5515	0.0514	5.59	3.365	0.52955
48	1	1	0.447	0.0541	5.88	3.545	0.68655
49	1	1	0.4545	0.0491	5.335	3.21	0.67375
50	2	1	0.473	0.0492	5.345	3.22	0.5356
51	1	1	0.469	0.0558	6.065	3.65	0.6522
52	2	0.333333	0.452	0.0420667	4.57	NaN	0.448867
53	2	0.5	0.379	0.047	5.105	NaN	0.46365
57	2	0.5	0.3935	0.0474	5.155	NaN	0.39665
59	2	0.5	0.373	0.0389	4.23	NaN	0.39545
60	2	1	0.356	0.05595	6.085	3.665	0.39605
1	3	111	0.45725	0.0548	5.9525	397.25
1	4	302.25	0.3965	0.034775	3.7825	668.325	0.6857
1	5	366	0.353167	0.0413333	4.49333	975.917	0.769667
2	3	107.5	0.4385	0.05325	5.7875	373.625
2	4	266	0.3745	0.0431	4.685	750.65	0.76335
2	5	197.667	0.429	0.0458667	4.98667	590.733	0.945533
3	3	101	0.458143	0.0492857	5.35286	324.886
4	3	65	0.458	0.05125	5.575	220.1
4	4	147.333	0.448333	0.0364	3.95667	356.3	0.867033
4	5	173.25	0.4215	0.045375	4.9325	489.75	0.96905
5	5	151.5	0.433	0.0448	4.87	445.05	1.02852
6	3	62	0.4528	0.05378	5.84	217.16
6	5	121	0.474	0.0489	5.31	387.1	1.00395
7	3	45.5	0.4695	0.051975	5.65	155.067
7	4	124.75	0.41725	0.04205	4.5675	347.85	0.960875
7	5	109.5	0.4565	0.0513	5.58	371.45	0.98805
8	3	43.5	0.469	0.053075	5.765	150.925
8	4	88.3333	0.450667	0.0462333	5.02333	264.167	0.9125
8	5	98.2	0.4536	0.04794	5.208	309.76	1.02968
9	5	69.5	0.491	0.0471	5.12	219.2	0.9697
10	3	28.6667	0.455333	0.0510667	5.55	93.67
10	4	76.1667	0.457	0.0441833	4.805	217.333	0.93975
10	5	73.3333	0.447667	0.0459667	4.99667	221.333	1.05393
11	3	27.5	0.45475	0.052325	5.6875	93.145
11	5	72	0.476667	0.0474	5.14667	223.2	1.00883
12	3	30.5	0.4915	0.05585	6.065	111.5
12	4	50.6667	0.451333	0.0431	4.68333	143.12	0.957833
12	5	45.5	0.492	0.050925	5.5325	149.477	0.966225
13	3	21.5	0.48225	0.0521	5.66	73.66
13	5	46.6667	0.468333	0.0495	5.38	152.067	0.993133
14	3	20	0.467667	0.0544	5.91	71.2367
14	4	50.5	0.485	0.0455	4.95	151	0.8966
15	3	14	0.4535	0.05355	5.82	48.81
15	4	47.5	0.47475	0.04845	5.2675	148.15	0.908675
15	5	30.25	0.492	0.050925	5.535	100.043	0.95225
16	3	17.5	0.4685	0.05395	5.865	62.0275
16	4	33	0.50575	0.05205	5.66	111.698	0.8378
16	5	33.1667	0.495333	0.0522667	5.68333	113.587	0.9339
17	3	14	0.476	0.0552	6	50.455
17	4	37	0.4855	0.05135	5.585	124.79	0.87825
17	5	33.5	0.509	0.0505	5.485	110.65	0.9216
18	3	12.1667	0.4705	0.0545167	5.92667	43.59
18	4	29.25	0.49325	0.050625	5.5	96.6175	0.888225
18	5	20.8	0.5054	0.05232	5.688	70.962	0.904
19	4	25.5	0.444	0.0446	4.85	72.98	0.9442
19	5	25	0.494333	0.0501333	5.45	82.1067	0.905267
20	3	10	0.48	0.05375	5.84	35.2
20	4	25.5	0.4885	0.04785	5.205	79.72	0.87975
20	5	22	0.497	0.0529	5.75	76.185	0.90585
21	3	9	0.472333	0.0553	6.01	32.4
21	4	19.6	0.5024	0.04794	5.21	61.38	0.8641
21	5	15.2	0.476	0.05166	5.616	51.808	0.95344
22	3	7.75	0.486	0.0545	5.9225	27.6775
22	5	18.5	0.4825	0.05145	5.595	62.355	0.9492
23	4	16.6	0.4792	0.04928	5.354	52.678	0.86004
23	5	12.8571	0.495	0.0536	5.82571	45.33	0.878
24	3	6.83333	0.482667	0.0558167	6.06833	24.9183
24	4	12.5	0.495	0.04575	4.975	37.515	0.85605
25	3	5.5	0.477	0.0569	6.18	20.41
25	4	16	0.4645	0.04615	5.015	48.655	0.88475
25	5	11	0.49	0.0519333	5.64667	37.52	0.903967
26	3	4.33333	0.486	0.0540333	5.87333	15.2867
26	4	11.75	0.48125	0.049825	5.415	38.1875	0.835975
26	5	9	0.4716	0.05508	5.986	32.628	0.8532
27	3	6	0.467	0.0559	6.08	21.955
27	4	10	0.4935	0.04555	4.945	29.795	0.8314
27	5	9.66667	0.492667	0.0537	5.84	33.9067	0.847033
28	3	4.4	0.4606	0.05706	6.202	16.488
28	4	10.6667	0.495	0.0518	5.63333	36.3733	0.765367
29	3	3.66667	0.48	0.0549	5.97	13.2133
29	4	6.5	0.513	0.04955	5.385	21.645	0.7457
29	5	6.71429	0.462857	0.0564	6.13286	24.86	0.750357
30	3	3.5	0.477	0.05535	6.015	12.695
30	4	6.5	0.5	0.05805	6.31	24.05	0.75595
31	3	2.5	0.454	0.056425	6.1325	9.235
31	5	5.25	0.4655	0.055	5.98	18.9125	0.676625
32	3	3	0.457333	0.0543667	5.91	10.6733
32	4	6.25	0.481	0.05015	5.45	20.345	0.672625
32	5	5.33333	0.467	0.0542333	5.89667	18.8367	0.668167
33	3	2.66667	0.462333	0.0568667	6.18	9.88333
33	4	5	0.4625	0.053	5.765	17.46	0.72215
33	5	4	0.403667	0.0526	5.71667	13.7433	0.680733
34	3	2	0.453333	0.0566	6.15333	7.41333
34	5	4	0.43	0.0539	5.86	13.77	0.6155
35	3	2	0.4435	0.05725	6.225	7.36
35	5	4	0.454	0.056025	6.09	14.675	0.61695
36	3	2	0.45075	0.056875	6.18	7.4425
36	4	3.5	0.4545	0.06165	6.7	13.98	0.56585
37	3	1.5	0.419	0.05655	6.145	5.565
37	5	2.83333	0.4275	0.0539	5.86167	9.99333	0.515533
38	3	1.8	0.4194	0.05612	6.102	6.614
38	4	3.25	0.406	0.046125	5.0125	9.855	0.546875
39	5	3	0.39825	0.04995	5.4275	9.805	0.4869
40	3	1.2	0.4206	0.05172	5.622	4.144
40	4	3.25	0.4345	0.056025	6.0925	11.8575	0.398525
40	5	2	0.4445	0.05785	6.29	7.575	0.4284
41	3	1	0.355	0.049225	5.35	3.2225
42	5	1.66667	0.408667	0.0505333	5.48667	5.71667	0.360467
43	3	0.666667	0.370333	0.0524667	5.7	NaN
43	5	1.5	0.33925	0.0523	5.685	5.2725	0.305425
44	3	1	0.32825	0.040425	4.3975	2.65
44	5	1.66667	0.372	0.0597	6.49	6.69667	0.286967
45	3	1	0.351	0.0475	5.165	3.105
46	5	1	0.3615	0.0455	4.945	2.98	0.22425
48	5	1	0.3365	0.03685	4	2.41	0.20645
52	5	1	0.268	0.03345	3.635	2.185	0.18565
53	3	0	0.227	0.0543	5.9	NaN
59	3	0	0.266	0.0454	4.94	NaN
61	3	0	0.278	0.0617333	6.71	NaN
62	5	0	0.2395	0.03745	4.075	NaN	0.1661
63	3	0	0.2456	0.0374	4.066	NaN
64	3	0	0.2705	0.01495		NaN
64	5	0	0.328	0.0485333	5.27333	NaN	0.160467
70	5	0	0.3305	0.03345	3.635	NaN	0.15405
71	5	0	0.274	0.0354	3.85	NaN	0.1692
82	3	0	0.244222	0.0295667	3.21444	NaN

## Sheet: zoo_counts
		Real counts of subsample								Real counts per entire sample								Ind/m3
	Station	1	2	3	4	5			Station	1	2	3	4	5			Stations	1	2	Mean	SD	3	5	Mean	SD
	Calanus spp	202	343	323	343	409			Calanus spp	2020	3430	12920	13720	16360			Calanus spp	101	171.5	136.25	49.851	646	818	732	121.622
	Copepods	29	110	109	72	59			Copepods	290	1100	4360	2880	2360			Copepods	14.5	55	34.75	28.6378	218	118	168	70.7107
	Cladocera	10	71	65	36	44			Cladocera	100	710	2600	1440	1760			Cladocera	5	35.5	20.25	21.5668	130	88	109	29.6985
	Euphausiidae	5	5	42	6	2			Euphausiidae	50	50	1680	240	80			Euphausiidae	2.5	2.5	2.5	0	84	4	44	56.5685
	Amphipoda	6	1	4		3			Amphipoda	6	1	4		3			Amphipoda	0.3	0.05	0.175	0.176777	0.2	0.15	0.175	0.0353553
	Chaetognatha	4	3	1	4	6			Chaetognatha	4	3	1	4	6			Chaetognatha	0.2	0.15	0.175	0.0353553	0.05	0.3	0.175	0.176777
	Gastropoda veliger	10			41	36			Gastropoda veliger	100	0	0	1640	1440			Gastropoda veliger	5	0	2.5	3.53553	0	72	36	50.9117
	Hydrozoa		33		15	14			Hydrozoa	0	330	0	600	560			Hydrozoa	0	16.5	8.25	11.6673	0	28	14	19.799
	Ctenophora								Ctenophora	0	0	0	0	0			Ctenophora	0	0	0	0	0	0	0	0
	Cnidaria								Cnidaria	0	0	0	0	0			Cnidaria	0	0	0	0	0	0	0	0
	Oikopleura		2						Oikopleura	0	20	0	0	0			Oikopleura	0	1	0.5	0.707107	0	0	0	0
									Sampling depth	20	20	20	40	20			Sampling depth	20	20			20	20
		10	10	40	40	40

## Sheet: phytoplankton counts
Counts (cell.L-1)		Station_depth
	1_1m	2_10m	1_20m	1_40m	1_60m	2_1m	2_20m	2_40m	2_60m	3_1m	3_10m	3_20m	3_40m	3_60m	4_1m	4_20m	5_1m
Ciliates	2385.2	1703.8	1023.8	1869.5	510	2111.4	2315.2	1779.5	910	2171.4	1197.6	1865.2	791.9	391.9	5175.6	775.7	2906.6
Proboscia	580	230	560	330	170	380	330	360	80	280	70	160	190	80	180	120	150
Tripos	540	730	600	700	70	540	450	720	50	410	200	390	70	170	460	330	420
Other flagellates	43561.3	13433	34350.1	25542.7	12291.6	27249.8	84052.2	43945.1	24947	32431.1	14594.4	47399.3	10170.7	6342.7	22452.3	23411.8	22068.5
